# Supplementary material for: A Lewis acid-promoted Pinner reaction
Source: PubMed Central journal article supplement (PMC3740506; doi:10.3762/bjoc.9.179), 2013-08-02

**Supporting Information**  
**for**  
**A Lewis acid-promoted Pinner reaction**

Dominik Pfaff, Gregor Nemecek and Joachim Podlech\*

Address: Institut für Organische Chemie, Karlsruher Institut für Technologie (KIT), Fritz-Haber-Weg 6, 76131 Karlsruhe, Germany

Email: Joachim Podlech - joachim.podlech@kit.edu

\* Corresponding author

**Experimental section and NMR spectra of all synthesized compounds.**

Content:

A. Experimental Section

B.  $^1\text{H}$  and  $^{13}\text{C}$  NMR spectra of:

1. (9*H*-Fluoren-9-yl)methyl acetate (**2**)
2. (9*H*-Fluoren-9-yl)methyl phenylacetate (**3**)
3. (9*H*-Fluoren-9-yl)methyl benzoate (**4**)
4. (9*H*-Fluoren-9-yl)methyl acrylate (**5**)
5. 1-Decyl acetate (**7**)
6. 1-Decyl phenylacetate (**8**)
7. 1-Decyl benzoate (**9**)
8. 1-Decyl acrylate (**10**)
9. 6-Chlorohexyl acetate (**12**)
10. 6-Chlorohexyl phenylacetate (**13**)
11. 6-Chlorohexyl benzoate (**14**)
12. 6-Chlorohexyl acrylate (**15**)
13. 2-(2-Ethoxyethoxy)ethyl acetate (**17**)
14. 2-(2-Ethoxyethoxy)ethyl phenylacetate (**18**)
15. 2-(2-Ethoxyethoxy)ethyl benzoate (**19**)
16. 2-(2-Ethoxyethoxy)ethyl acrylate (**20**)
17. 4-Nitrobenzyl acetate (**22**)
18. 4-Nitrobenzyl phenylacetate (**23**)
19. 4-Nitrobenzyl benzoate (**24**)
20. 4-Nitrobenzyl acrylate (**25**)
21. 4-(Acetoxymethyl)benzoic acid (**27**)
22. 4-[(Phenylacetoxymethyl)]benzoic acid (**28**)
23. 4-(Benzoyloxymethyl)benzoic acid (**29**)
24. 4-(Acryloyloxymethyl)benzoic acid (**30**)
25. Hexane-1,6-diyl diacetate (**32**)
26. 6-Hydroxyhexyl acetate (**33**)
27. Hexane-1,6-diyl bis(phenylacetate) (**34**)
28. 6-Hydroxyhexyl phenylacetate (**35**)
29. Ethyl 6-acetoxyhexanoate (**37**)
30. Ethyl 6-(phenylacetoxymethyl)hexanoate (**38**)
31. 6-Ethoxy-6-oxohexyl benzoate (**39**)
32. Ethyl 6-(acryloyloxymethyl)hexanoate (**40**)
33. 4-(Benzyloxycarbonylamino)butyl acetate (**42**)
34. 4-(Benzyloxycarbonylamino)butyl phenylacetate (**43**)
35. 4-(Benzyloxycarbonylamino)butyl acrylate (**44**)
36. Cyclohexyl acetate (**46**)
37. Cyclohexyl phenylacetate (**47**)
38. 2-(4-Hydroxyphenyl)ethyl acetate (**54**)
39. 2-(4-Hydroxyphenyl)ethyl phenylacetate, pmonaspilosin (**55**)
40. Benzyl acetate (**57**)
41. *N*-Benzylacetamide (**58**)
42. Benzyl phenylacetate (**59**)
43. *N*-Benzyl-phenylacetamide (**60**)
44. *N*-Benzylbenzamide (**61**)
45. Benzyl acrylate (**62**)
46. *N*-Benzylacrylamide (**63**)
47. 4-Fluorobenzyl acetate (**65**)
48. *N*-4-(Fluorobenzyl)acetamide (**66**)
49. *N*-(4-Fluorobenzyl)phenylacetamide (**67**)
50. *N*-(4-Fluorobenzyl)benzamide (**68**)
51. *N*-(4-Fluorobenzyl)acrylamide (**69**)

## A. Experimental Section

**General.** Flash column chromatography was carried out using Merck SiO<sub>2</sub> 60 (230–400 mesh),<sup>1</sup> and thin layer chromatography (TLC) was carried out using commercially available Merck F254 precoated sheets. <sup>1</sup>H and <sup>13</sup>C NMR spectra were recorded on a Bruker AVANCE 300 or on an AM-400 spectrometer. Chemical shifts are given in ppm and were referenced using residual signals of the solvent as internal standard (<sup>1</sup>H: CHCl<sub>3</sub>, 7.26, acetone, 2.05; <sup>13</sup>C: CDCl<sub>3</sub>, 77.16). IR spectra were recorded on a Bruker IFS-88 spectrometer. Mass spectra were recorded on a Finnigan MAT-90 mass spectrometer.

**General procedure (GP 1) for reactions with acetonitrile or acrylonitrile.**<sup>2</sup> TMSOTf (336 mg, 1.51 mmol) is added to a solution of the alcohol (0.755 mmol) in the respective nitrile (3 mL) and the mixture is stirred at rt for 65 h. H<sub>2</sub>O (25 mL) and brine (25 mL) are added, and the mixture is extracted with EtOAc (3 × 30 mL). The combined organic layers are dried (Na<sub>2</sub>SO<sub>4</sub>) and concentrated. The crude product is purified by flash column chromatography (silica gel).

**General procedure (GP 2) for reactions with acrylonitrile in the presence of nitrobenzene.** TMSOTf (336 mg, 1.51 mmol) is added to a solution of the alcohol (0.755 mmol) and nitrobenzene (93 mg, 0.755 mmol) in the respective nitrile (3 mL) and the mixture is stirred at rt for 65 h. H<sub>2</sub>O (25 mL) and brine (25 mL) are added, and the mixture is extracted with EtOAc (3 × 30 mL). The combined organic layers are dried (Na<sub>2</sub>SO<sub>4</sub>) and concentrated. The crude product is purified by flash column chromatography (silica gel).

**General procedure (GP 3) for reactions with benzyl cyanide or benzonitrile.**<sup>2</sup> TMSOTf (336 mg, 1.51 mmol) is added to a solution of the alcohol (0.755 mmol) in the respective nitrile (3 mL) and the mixture is stirred at rt for 65 h. H<sub>2</sub>O (25 mL) and brine (25 mL) are added, and the mixture is extracted with EtOAc (3 × 30 mL). The combined organic layers are dried (Na<sub>2</sub>SO<sub>4</sub>) and concentrated, and excess nitrile is distilled off at reduced pressure (90 °C, 0.1 mbar). The crude product is purified by flash column chromatography (silica gel).

**(9H-Fluoren-9-yl)methyl acetate (2).** 9H-Fluoren-9-ylmethanol (**1**) and MeCN were reacted according to GP 1. Chromatography (hexanes/EtOAc, 9:1) afforded **2** (152 mg, 83%) as a yellow solid. *R*<sub>f</sub> = 0.53 (hexanes/EtOAc, 3:1). <sup>1</sup>H NMR (300 MHz, CDCl<sub>3</sub>) δ 2.16 (s, 3H, Me), 4.22 (t, <sup>3</sup>*J* = 7.2 Hz, 1H, 9'-H), 4.37 (d, <sup>3</sup>*J* = 7.2 Hz, 2H, CH<sub>2</sub>), 7.33 (t, <sup>3</sup>*J* = 7.4 Hz, 2H, 2'-H, 7'-H), 7.42 (t, <sup>3</sup>*J* = 7.4 Hz, 2H, 3'-H,

<sup>1</sup> Still, W. C.; Kahn, M.; Mitra, A. *J. Org. Chem.*, **1978**, *43*, 2923–2925.

<sup>2</sup> Pfaff, D.; Nemecek, G.; Podlech, J. *Helv. Chim. Acta*, **2012**, *95*, 1851–1856.

6'-H), 7.61 (d,  $^3J = 7.4$  Hz, 2H, 1'-H, 8'-H), 7.78 (d,  $^3J = 7.4$  Hz, 2H, 4'-H, 5'-H). The spectrum is in full agreement with published data.<sup>3</sup>

**(9H-Fluoren-9-yl)methyl phenylacetate (3).** 9H-Fluoren-9-ylmethanol (**1**) and BnCN were reacted according to GP 3. Chromatography (hexanes/EtOAc, 9:1) afforded **3** (207 mg, 86%) as a yellow oil.  $R_f = 0.59$  (hexanes/EtOAc, 3:1). IR (KBr):  $\tilde{\nu}$  ( $\text{cm}^{-1}$ ) = 3452 (w), 3064 (m), 3032 (m), 2949 (m), 2891 (w), 1732 (s, C=O), 1451 (s), 1255 (s), 1148 (s), 1007 (m), 758 (s), 740 (s), 543 (m), 426 (m).  $^1\text{H}$  NMR (400 MHz,  $\text{CDCl}_3$ )  $\delta$  3.71 (s, 2H,  $\text{CH}_2\text{Ph}$ ), 4.18 (t,  $^3J = 7.2$  Hz, 1H, 9'-H), 4.39 (d,  $^3J = 7.2$  Hz, 2H,  $\text{OCH}_2$ ), 7.22–7.42 (m, 11H,  $\text{H}_{\text{ar}}$ ), 7.75 (d,  $^3J = 7.5$  Hz, 4'-H, 5'-H).  $^{13}\text{C}$  NMR (100 MHz,  $\text{CDCl}_3$ )  $\delta$  41.8 (t), 46.8 (d), 66.9 (t), 120.1 (2 d), 125.2 (d), 127.2 (2 d), 127.3 (2 d), 127.9 (2 d), 128.8 (2 d), 129.5 (2 d), 134.0 (s), 141.4 (2 s), 143.8 (2 s), 171.6 (s). MS (EI, 90 °C):  $m/z$  (%) = 314 (10) [ $\text{M}^+$ ], 179 (16), 178 (100), 165 (19), 91 (19). HRMS ( $^{12}\text{C}_{22}\text{H}_{18}\text{O}_2$ , EI): calcd. 314.1307 amu; found 314.1309 amu. Anal. calcd for  $\text{C}_{22}\text{H}_{18}\text{O}_2$  (314.13): C 84.05, H 5.77; found C 83.64, H 5.64.

**(9H-Fluoren-9-yl)methyl benzoate (4).** 9H-Fluoren-9-ylmethanol (**1**) and benzonitrile were reacted according to GP 3. Chromatography (hexanes/EtOAc, 9:1) afforded **4** (100 mg, 44%) as a yellow solid.  $R_f = 0.59$  (hexanes/EtOAc, 3:1).  $^1\text{H}$  NMR (300 MHz,  $\text{CDCl}_3$ )  $\delta$  4.40 (t,  $^3J = 7.2$  Hz, 1H, 9'-H), 4.62 (d,  $^3J = 7.2$  Hz, 2H,  $\text{CH}_2$ ), 7.33 (t,  $^3J = 7.4$  Hz, 2H, 2'-H, 7'-H), 7.43 (t,  $^3J = 7.4$  Hz, 2H, 3'-H, 6'-H), 7.50 (t,  $^3J = 7.5$  Hz, 2H, Ph), 7.61 (t,  $^3J = 7.4$  Hz, 1H, Ph), 7.67 (d,  $^3J = 7.4$  Hz, 2H, 1'-H, 8'-H), 7.80 (d,  $^3J = 7.4$  Hz, 2H, 4'-H, 5'-H), 8.11 (d,  $^3J = 7.8$  Hz, 2H, Ph). The spectrum is in full agreement with published data.<sup>4</sup>

**(9H-Fluoren-9-yl)methyl acrylate (5).** 9H-Fluoren-9-ylmethanol (**1**) and acrylonitrile were reacted according to GP 1. Chromatography (hexanes/EtOAc, 9:1) afforded **5** (100 mg, 52%) as a yellow oil. A similar reaction performed according to GP 2 yielded **5** (127 mg, 67%).  $R_f = 0.56$  (hexanes/EtOAc, 3:1).  $^1\text{H}$  NMR (300 MHz,  $\text{CDCl}_3$ )  $\delta$  4.28 (t,  $^3J = 7.3$  Hz, 1H, 9'-H), 4.46 (d,  $^3J = 7.3$  Hz, 2H,  $\text{CH}_2$ ), 5.91 (d,  $^3J = 10.3$  Hz, 1H, 3- $\text{H}_{\text{trans}}$ ), 6.23 (dd,  $^3J = 17.3$  Hz,  $^3J = 10.3$  Hz, 1H, 2-H), 6.48 (d,  $^3J = 17.3$  Hz, 1H, 3- $\text{H}_{\text{cis}}$ ), 7.33 (t,  $^3J = 7.4$  Hz, 2H, 2'-H, 7'-H), 7.42 (t,  $^3J = 7.4$  Hz, 2H, 3'-H, 6'-H), 7.61 (d,  $^3J = 7.4$  Hz, 2H, 1'-H, 8'-H), 7.78 (d,  $^3J = 7.4$  Hz, 2H, 4'-H, 5'-H). The spectrum is in full agreement with published data.<sup>5</sup>

**1-Decyl acetate (7).** 1-Decanol (**6**) and MeCN were reacted according to GP 1. Chromatography (hexanes/EtOAc, 9:1) afforded **7** (121 mg, 80%) as a colourless oil.  $R_f = 0.63$  (hexanes/EtOAc, 3:1).

<sup>3</sup> Débieux, J.-L.; Cosandey, A.; Helgen, C.; Bochet, C. G. *Eur. J. Org. Chem.*, **2007**, 2073–2077.

<sup>4</sup> More O'Ferrall, R. A.; Larkin, F.; Walsh, P. *J. Chem. Soc., Perkin Trans. 2*, **1982**, 1573–1579.

<sup>5</sup> Schild, H. G.; Tirrell, D. A. *Macromolecules*, **1992**, *25*, 4553–4558.

<sup>1</sup>H NMR (300 MHz, CDCl<sub>3</sub>) δ 0.88 (t, <sup>3</sup>J = 6.6 Hz, 3H, 10'-H<sub>3</sub>), 1.20–1.36 [m, 14H, Me(CH<sub>2</sub>)<sub>7</sub>], 1.61 (tt, <sup>3</sup>J = 6.8 Hz, <sup>3</sup>J = 6.4 Hz, 2H, 2'-H<sub>2</sub>), 2.04 (s, 3H, OAc), 4.05 (t, <sup>3</sup>J = 6.8 Hz, 2H, 1'-H<sub>2</sub>). The spectrum is in full agreement with published data.<sup>6</sup>

**1-Decyl phenylacetate (8).** 1-Decanol (**6**) and BnCN were reacted according to GP 3. Chromatography (hexanes/EtOAc, 9:1) afforded **8** (177 mg, 85%) as a yellowish oil. *R*<sub>f</sub> = 0.69 (hexanes/EtOAc 3:1). <sup>1</sup>H NMR (300 MHz, CDCl<sub>3</sub>) δ 0.89 (t, <sup>3</sup>J = 6.7 Hz, 3H, Me), 1.21–1.35 [m, 14H, Me(CH<sub>2</sub>)<sub>7</sub>], 1.55–1.65 (m, 2H, 2'-H<sub>2</sub>), 3.61 (s, 2H, CH<sub>2</sub>Ph), 4.08 (t, <sup>3</sup>J = 6.7 Hz, 2H, 1'-H<sub>2</sub>), 7.22–7.38 (m, 5H, Ph). The spectrum is in full agreement with published data.<sup>7</sup>

**1-Decyl benzoate (9).** 1-Decanol (**6**) and PhCN were reacted according to GP 3. Chromatography (hexanes/EtOAc, 19:1) afforded **9** (45 mg, 23%) as a yellowish oil. *R*<sub>f</sub> = 0.69 (hexanes/EtOAc, 3:1). <sup>1</sup>H NMR (300 MHz, CDCl<sub>3</sub>) δ 0.88 (t, <sup>3</sup>J = 6.4 Hz, 3H, Me), 1.20–1.45 [m, 14H, Me(CH<sub>2</sub>)<sub>7</sub>], 1.77 (tt, <sup>3</sup>J = 7.1 Hz, <sup>3</sup>J = 6.5 Hz, 2H, 2'-H<sub>2</sub>), 4.31 (t, <sup>3</sup>J = 6.5 Hz, 2H, 1'-H<sub>2</sub>), 7.44 (t, <sup>3</sup>J = 7.5 Hz, 2H, Ph), 7.55 (t, <sup>3</sup>J = 7.2 Hz, 1H, Ph), 8.05 (d, <sup>3</sup>J = 7.3 Hz, 2H, Ph). The spectrum is in full agreement with published data.<sup>8</sup>

**1-Decyl acrylate (10).** 1-Decanol (**6**) and acrylonitrile were reacted according to GP 1. Chromatography (hexanes/EtOAc, 9:1) afforded **10** (47 mg, 29%) as a colourless oil. A similar reaction performed according to GP 2 yielded **10** (64 mg, 40%). *R*<sub>f</sub> = 0.69 (hexanes/EtOAc, 3:1). <sup>1</sup>H NMR (300 MHz, CDCl<sub>3</sub>) δ 0.88 (t, <sup>3</sup>J = 6.6 Hz, 3H, Me), 1.23–1.40 [m, 14H, H<sub>3</sub>C(CH<sub>2</sub>)<sub>7</sub>], 1.66 (tt, <sup>3</sup>J = 7.1 Hz, <sup>3</sup>J = 6.7 Hz, 2H, 2'-H<sub>2</sub>), 4.15 (t, <sup>3</sup>J = 6.7 Hz, 2H, 1'-H<sub>2</sub>), 5.81 (dd, <sup>2</sup>J = 1.6 Hz, <sup>3</sup>J = 10.4 Hz, 1H, 3-H<sub>trans</sub>), 6.12 (dd, <sup>3</sup>J = 10.4 Hz, <sup>3</sup>J = 17.3 Hz, 1H, 2'-H<sub>2</sub>), 6.40 (dd, <sup>2</sup>J = 1.6 Hz, <sup>3</sup>J = 17.3 Hz, 1H, 3-H<sub>cis</sub>). The spectrum is in full agreement with published data.<sup>9</sup>

**6-Chlorohexyl acetate (12).** 6-Chlorohexanol (**11**) and MeCN were reacted according to GP 1. Chromatography (hexanes/EtOAc, 9:1) afforded **12** (114 mg, 84%) as a colourless oil. *R*<sub>f</sub> = 0.56 (hexanes/EtOAc, 3:1). <sup>1</sup>H NMR (300 MHz, CDCl<sub>3</sub>) δ 1.31–1.53 (m, 4H, 3'-H<sub>2</sub>, 4'-H<sub>2</sub>), 1.64 (tt, <sup>3</sup>J = 6.8 Hz, <sup>3</sup>J = 7.2 Hz, 2H, 2'-H<sub>2</sub>), 1.78 (tt, <sup>3</sup>J = 6.7 Hz, <sup>3</sup>J = 7.3 Hz, 2H, 5'-H<sub>2</sub>), 2.05 (s, 3H, Me), 3.53 (t, <sup>3</sup>J = 6.7 Hz, 2H, 6'-H<sub>2</sub>), 4.06 (t, <sup>3</sup>J = 6.7 Hz, 2H, 1'-H<sub>2</sub>). The spectrum is in full agreement with published data.<sup>10</sup>

<sup>6</sup> Magens, S.; Plietker, B. *J. Org. Chem.*, **2010**, *75*, 3715–3721.

<sup>7</sup> Velusamy, S.; Borpuzari, S.; Punniyamurthy, T. *Tetrahedron*, **2005**, *61*, 2011–2015.

<sup>8</sup> Behloul, C.; Guijarro, D.; Yus, M. *Synthesis*, **2006**, 309–314.

<sup>9</sup> Ryu, J.-H.; Roy, R.; Ventura, J. *Langmuir*, **2010**, *26*, 7086–7092.

<sup>10</sup> Doláková, P.; Dračínský, M.; Fanfrlík, J.; Holý, A. *Eur. J. Org. Chem.*, **2009**, 1082–1092.

**6-Chlorohexyl phenylacetate (13).** 6-Chlorohexanol (**11**) and BnCN were reacted according to GP 3. Chromatography (hexanes/EtOAc, 9:1) afforded **13** (174 mg, 90%) as a yellowish oil.  $R_f = 0.59$  (hexanes/EtOAc, 3:1).  $^1\text{H NMR}$  (300 MHz,  $\text{CDCl}_3$ )  $\delta$  1.23–1.49 (m, 4H, 3'-H<sub>2</sub>, 4'-H<sub>2</sub>), 1.63 (tt,  $^3J = 6.8$  Hz,  $^3J = 7.3$  Hz, 2H, 5'-H<sub>2</sub>), 1.75 (tt,  $^3J = 6.8$  Hz,  $^3J = 7.3$  Hz, 2H, 2'-H<sub>2</sub>), 3.51 (t,  $^3J = 6.7$  Hz, 2H, 6'-H<sub>2</sub>), 3.62 (s, 2H,  $\text{CH}_2\text{Ph}$ ), 4.09 (t,  $^3J = 6.6$  Hz, 2H, 1'-H<sub>2</sub>), 7.23–7.40 (m, 5H, Ph). The spectrum is in full agreement with published data.<sup>11</sup>

**6-Chlorohexyl benzoate (14).** 6-Chlorohexanol (**11**) and PhCN were reacted according to GP 3. Chromatography (hexanes/EtOAc, 9:1) afforded **14** (50 mg, 27%) as a yellowish oil.  $R_f = 0.62$  (hexanes/EtOAc, 3:1).  $^1\text{H NMR}$  (300 MHz,  $\text{CDCl}_3$ )  $\delta$  1.42–1.60 (m, 4H, 3'-H<sub>2</sub>, 4'-H<sub>2</sub>), 1.73–1.88 (m, 4H, 2'-H<sub>2</sub>, 5'-H<sub>2</sub>), 3.55 (t,  $^3J = 6.6$  Hz, 2H, 6'-H<sub>2</sub>), 4.33 (t,  $^3J = 6.6$  Hz, 2H, 1'-H<sub>2</sub>), 7.44 (t,  $^3J = 7.5$  Hz, 2H, Ph), 7.56 (t,  $^3J = 7.4$  Hz, 1H, Ph), 8.04 (d,  $^3J = 7.8$  Hz, 2H, Ph). The spectrum is in full agreement with published data.<sup>12</sup>

**6-Chlorohexyl acrylate (15).** 6-Chlorohexanol (**11**) and acrylonitrile were reacted according to GP 1. Chromatography (hexanes/EtOAc, 9:1) afforded **15** (55 mg, 38%) as a colourless oil. A similar reaction performed according to GP 2 yielded **15** (23 mg, 16%).  $R_f = 0.64$  (hexanes/EtOAc, 3:1).  $^1\text{H NMR}$  (300 MHz,  $\text{CDCl}_3$ )  $\delta$  1.33–1.55 (m, 4H, 3'-H<sub>2</sub>, 4'-H<sub>2</sub>), 1.69 (tt,  $^3J = 6.7$  Hz,  $^3J = 7.2$  Hz, 2H, 5'-H<sub>2</sub>), 1.79 (tt,  $^3J = 6.6$  Hz,  $^3J = 7.2$  Hz, 2H, 2'-H<sub>2</sub>), 3.54 (t,  $^3J = 6.6$  Hz, 2H, 6'-H<sub>2</sub>), 4.16 (t,  $^3J = 6.6$  Hz, 2H, 1'-H<sub>2</sub>), 5.82 (dd,  $^2J = 1.1$  Hz,  $^3J = 10.4$  Hz, 1H, 3-H<sub>trans</sub>), 6.12 (dd,  $^3J = 10.4$  Hz,  $^3J = 17.3$  Hz, 1H, 2-H), 6.40 (dd,  $^3J = 1.1$  Hz,  $^3J = 17.3$  Hz, 1H, 3-H<sub>cis</sub>). The spectrum is in full agreement with published data.<sup>13</sup>

**2-(2-Ethoxyethoxy)ethyl acetate (17).** 2-(2-Ethoxyethoxy)ethanol (**16**) and MeCN were reacted according to GP 1. Chromatography (hexanes/EtOAc, 4:1) afforded **17** (101 mg, 75%) as a colourless oil.  $R_f = 0.16$  (hexanes/EtOAc 3:1).  $^1\text{H NMR}$  (300 MHz,  $\text{CDCl}_3$ )  $\delta$  1.21 (t,  $^3J = 7.0$  Hz, 3H,  $\text{OCH}_2\text{CH}_3$ ), 2.07 (s, 3H, OAc), 3.53 (q,  $^3J = 7.0$  Hz, 2H,  $\text{OCH}_2\text{CH}_3$ ), 3.56–3.67 (m, 4H,  $\text{EtOCH}_2\text{CH}_2\text{O}$ ), 3.70 (t,  $^3J = 4.8$  Hz, 2H,  $\text{OCH}_2\text{CH}_2\text{OAc}$ ), 4.23 (t,  $^3J = 4.8$  Hz, 2H,  $\text{OCH}_2\text{CH}_2\text{OAc}$ ). The spectrum is in full agreement with published data.<sup>14</sup>

<sup>11</sup> Bron, J.; Sterk, G., J.; Timmerman, H.; Veerman, M. E. J.; Van Der Werf, J. F. *Substituted ethanolamine esters*, WO9408945 (A1), 28.04.1994.

<sup>12</sup> Molander, G. A.; Cavalcanti, L. N. *J. Org. Chem.*, **2011**, *76*, 7195–7203.

<sup>13</sup> Bergbreiter, D. E.; Chance, B. S. *Macromolecules*, **2007**, *40*, 5337–5343.

<sup>14</sup> Oriyama, T.; Kimura, M.; Oda, M.; Koga, G. *Synlett*, **1993**, 437–440.

**2-(2-Ethoxyethoxy)ethyl phenylacetate (18).** 2-(2-Ethoxyethoxy)ethanol (**16**) and BnCN were reacted according to GP 3. Chromatography (hexanes/EtOAc, 4:1) afforded **18** (162 mg, 85%) as a colourless oil.  $R_f = 0.20$  (hexanes/EtOAc, 3:1). IR (KBr):  $\tilde{\nu}$  ( $\text{cm}^{-1}$ ) = 3450 (w), 2974 (m), 2870 (m), 1737 (m, C=O), 1454 (w), 1253 (m), 1114 (m), 1043 (w), 697 (w).  $^1\text{H}$  NMR (400 MHz,  $\text{CDCl}_3$ )  $\delta$  1.21 (t,  $^3J = 7.0$  Hz, 3H, Me), 3.52 (q,  $^3J = 7.0$  Hz, 2H,  $\text{CH}_2\text{Me}$ ), 3.53–3.62 (m, 4H,  $\text{EtOCH}_2\text{CH}_2\text{O}$ ), 3.65 (s, 2H,  $\text{CH}_2\text{Ph}$ ), 3.69 (t,  $^3J = 4.8$  Hz, 2H,  $\text{OCH}_2\text{CH}_2\text{OAc}$ ), 4.26 (t,  $^3J = 4.8$  Hz, 2H,  $\text{OCH}_2\text{CH}_2\text{OAc}$ ), 7.23–7.35 (m, 5H, Ph).  $^{13}\text{C}$  NMR (100 MHz,  $\text{CDCl}_3$ )  $\delta$  15.3 (q), 41.4 (t), 64.2 (t), 66.8 (t), 69.2 (t), 69.9 (t), 70.8 (t), 127.2 (d), 128.7 (2 d), 129.4 (2 d), 134.1 (s), 171.7 (s). MS (EI, 20 °C):  $m/z$  (%) = 252 (36) [ $\text{M}^+$ ], 163 (34), 119 (15), 118 (59), 92 (10), 91 (100), 73 (14), 72 (35), 59 (22), 45 (26). HRMS ( $^{12}\text{C}_{14}\text{H}_{20}\text{O}_4$ , EI): calcd. 252.1362 amu; found 252.1364 amu. Anal. calcd for  $\text{C}_{14}\text{H}_{20}\text{O}_4$  (252.14): C 66.65, H 7.99; found C 66.79, H 7.89.

**2-(2-Ethoxyethoxy)ethyl benzoate (19).** 2-(2-Ethoxyethoxy)ethanol (**16**) and PhCN were reacted according to GP 3. Chromatography (hexanes/EtOAc, 4:1) afforded **19** (47 mg, 26%) as a colourless oil.  $R_f = 0.23$  (hexane/EtOAc, 3:1).  $^1\text{H}$  NMR (300 MHz,  $\text{CDCl}_3$ )  $\delta$  1.20 (t,  $^3J = 7.0$  Hz, 3H, Me), 3.53 (q,  $^3J = 7.0$  Hz, 2H,  $\text{CH}_2\text{Me}$ ), 3.58–3.73 (m, 4H,  $\text{EtOCH}_2\text{CH}_2\text{O}$ ), 3.85 (t,  $^3J = 4.8$  Hz, 2H,  $\text{OCH}_2\text{CH}_2\text{OAc}$ ), 4.49 (t,  $^3J = 4.8$  Hz, 2H,  $\text{OCH}_2\text{CH}_2\text{OAc}$ ), 7.43 (t,  $^3J = 7.5$  Hz, 2H, Ph), 7.56 (t,  $^3J = 7.4$  Hz, 1H, Ph), 8.06 (d,  $^3J = 7.7$  Hz, 2H, Ph). The spectrum is in full agreement with published data.<sup>15</sup>

**2-(2-Ethoxyethoxy)ethyl acrylate (20).** 2-(2-Ethoxyethoxy)ethanol (**16**) and acrylonitrile were reacted according to GP 1. Chromatography (hexanes/EtOAc, 4:1) afforded **20** (32 mg, 23%) as a colourless oil. A similar reaction performed according to GP 2 yielded **20** (27 mg, 19%).  $R_f = 0.27$  (hexanes/EtOAc, 3:1).  $^1\text{H}$  NMR (300 MHz,  $\text{CDCl}_3$ )  $\delta$  1.21 (t,  $^3J = 7.0$  Hz, 3H, Me), 3.53 (q,  $^3J = 7.0$  Hz, 2H,  $\text{CH}_2\text{Me}$ ), 3.57–3.69 (m, 4H,  $\text{EtOCH}_2\text{CH}_2\text{O}$ ), 3.75 (t,  $^3J = 4.8$  Hz, 2H,  $\text{OCH}_2\text{CH}_2\text{OAc}$ ), 4.32 (t,  $^3J = 4.8$  Hz, 2H,  $\text{OCH}_2\text{CH}_2\text{OAc}$ ), 5.83 (dd,  $^2J = 1.3$  Hz,  $^3J = 10.4$ , 1H, 3- $\text{H}_{\text{trans}}$ ), 6.15 (dd,  $^3J = 10.4$  Hz,  $^3J = 17.3$ , 1H, 2-H), 6.43 (dd,  $^2J = 1.3$  Hz,  $^3J = 17.3$  Hz, 1H, 3- $\text{H}_{\text{cis}}$ ). The spectrum is in full agreement with published data.<sup>16</sup>

**4-Nitrobenzyl acetate (22).** 4-Nitrobenzyl alcohol (**21**) and MeCN were reacted according to GP 1. Chromatography (hexanes/EtOAc, 4:1) afforded **22** (133 mg, 90%) as a yellowish solid.  $R_f = 0.36$  (hexanes/EtOAc, 3:1).  $^1\text{H}$  NMR (300 MHz,  $\text{CDCl}_3$ )  $\delta$  2.15 (s, 3H, Me), 5.20 (s, 2H,  $\text{CH}_2$ ), 7.52 (d,  $^3J = 8.8$  Hz, 2H, Ar), 8.22 (d,  $^3J = 8.8$  Hz, 2H, Ar). The spectrum is in full agreement with published data.<sup>17</sup>

<sup>15</sup> Conn, R. C.; Collett, A. R.; Lazzell, C. L. *J. Am. Chem. Soc.*, **1932**, *54*, 4370–4372.

<sup>16</sup> Philippon, A.; Degueil-Castaing, M.; Beckwith, A. L. J.; Maillard, B., *J. Org. Chem.*, **1998**, *63*, 6814–6819.

<sup>17</sup> Barbero, M.; Bazzi, S.; Cadamuro, S.; Dughera, S. *Eur. J. Org. Chem.*, **2009**, 430–436.

**4-Nitrobenzyl phenylacetate (23).** 4-Nitrobenzyl alcohol (**21**) and BnCN were reacted according to GP 3. Chromatography (hexanes/EtOAc, 9:1) afforded **23** (160 mg, 78%) as a white solid.  $R_f = 0.39$  (hexanes/EtOAc, 3:1).  $^1\text{H NMR}$  (300 MHz,  $\text{CDCl}_3$ )  $\delta$  3.72 (s, 2H,  $\text{PhCH}_2$ ), 5.22 (s, 2H,  $\text{OCH}_2$ ), 7.24–7.38 (m, 5H, Ph), 7.42 (d,  $^3J = 8.7$  Hz, 2H, Ar), 8.18 (d,  $^3J = 8.7$  Hz, 2H, Ar). The spectrum is in full agreement with published data.<sup>18</sup>

**4-Nitrobenzyl benzoate (24).** 4-Nitrobenzyl alcohol (**21**) and PhCN were reacted according to GP 3. Chromatography (hexanes/EtOAc, 9:1) afforded **24** (77 mg, 39%) as a white solid.  $R_f = 0.39$  (hexanes/EtOAc, 3:1).  $^1\text{H NMR}$  (300 MHz,  $\text{CDCl}_3$ )  $\delta$  5.46 (s, 2H,  $\text{CH}_2$ ), 7.47 (t,  $^3J = 7.6$  Hz, 2H, Ph), 7.60 (t,  $^3J = 7.0$  Hz, 1H, Ph), 7.61 (d,  $^3J = 8.6$  Hz, 2H, Ar), 8.09 (d,  $^3J = 7.9$  Hz, 2H, Ph), 8.25 (d,  $^3J = 8.6$  Hz, 2H, Ar). The spectrum is in full agreement with published data.<sup>19</sup>

**4-Nitrobenzyl acrylate (25).** 4-Nitrobenzyl alcohol (**21**) and acrylonitrile were reacted according to GP 1. Chromatography (hexanes/EtOAc, 9:1) afforded **25** (133 mg, 85%) as a yellowish solid.  $R_f = 0.36$  (hexanes/EtOAc, 3:1).  $^1\text{H NMR}$  (300 MHz,  $\text{CDCl}_3$ )  $\delta$  5.30 (s, 2H,  $\text{CH}_2\text{Ar}$ ), 5.92 (d,  $^3J = 10.4$  Hz, 1H, 3- $\text{H}_{\text{trans}}$ ), 6.20 (dd,  $^3J = 10.4$  Hz,  $^3J = 17.3$  Hz, 1H, 2-H), 6.49 (d,  $^3J = 17.3$  Hz, 1H, 3- $\text{H}_{\text{cis}}$ ), 7.54 (d,  $^3J = 8.6$  Hz, 2H, Ar), 8.23 (d,  $^3J = 8.6$  Hz, 2H, Ar). The spectrum is in full agreement with published data.<sup>20</sup>

**4-(Acetoxymethyl)benzoic acid (27).** 4-(Hydroxymethyl)benzoic acid (**26**) and MeCN were reacted according to GP 1. Chromatography ( $\text{CH}_2\text{Cl}_2/\text{MeOH}/\text{AcOH}$ , 100:10:1) afforded **27** (130 mg, 88%) as a white solid.  $R_f = 0.31$  ( $\text{MeOH}/\text{CH}_2\text{Cl}_2$ , 19:1).  $^1\text{H NMR}$  (300 MHz,  $\text{CDCl}_3$ )  $\delta$  2.15 (s, 3H, Me), 5.18 (s, 2H,  $\text{CH}_2$ ), 7.46 (d,  $^3J = 8.2$  Hz, 2H, Ar), 8.12 (d,  $^3J = 8.2$  Hz, 2H, Ar), 11.0 (bs, 1H,  $\text{CO}_2\text{H}$ ). The spectrum is in full agreement with published data.<sup>21</sup>

**4-[(Phenylacetoxy)methyl]benzoic acid (28).** 4-(Hydroxymethyl)benzoic acid (**26**) and BnCN were reacted according to GP 3. Chromatography ( $\text{CH}_2\text{Cl}_2/\text{MeOH}/\text{AcOH}$ , 100:10:1) afforded **28** (179 mg, 87%) as a white solid.  $R_f = 0.29$  ( $\text{MeOH}/\text{CH}_2\text{Cl}_2$ , 19:1). IR (ATR):  $\tilde{\nu}$  ( $\text{cm}^{-1}$ ) = 2943 (m), 2557 (m), 1719 (s, C=O), 1682 (s, C=O), 1613 (m), 1427 (m), 1291 (s), 1266 (s), 1144 (s), 1127 (s), 1029 (m), 750 (s), 718 (s), 692 (s).  $^1\text{H NMR}$  (400 MHz,  $\text{CDCl}_3$ )  $\delta$  3.71 (s, 2H,  $\text{PhCH}_2$ ), 5.21 (s, 2H,  $\text{OCH}_2$ ), 7.27–7.37 (m, 5H, Ph), 7.38 (d,  $^3J = 8.4$  Hz, 2H, Ar), 8.08 (d,  $^3J = 8.4$  Hz, 2H, Ar), 11.1 (bs, 1H,  $\text{COOH}$ ).  $^{13}\text{C NMR}$  (100 MHz,  $\text{CDCl}_3$ )  $\delta$  41.5 (t), 65.9 (t), 127.4 (d), 127.7 (d), 128.8 (d), 129.1 (s), 129.4 (d), 130.6 (d),

<sup>18</sup> Merkley, N.; Warkentin, J. *Can. J. Chem.*, **2000**, *78*, 942–949.

<sup>19</sup> Sharghi, H; Sarvari, M. H.; Eskandari, R. *J. Chem. Res.*, **2005**, 488–491.

<sup>20</sup> Merski, M; Townsend, C. A. *J. Am. Chem. Soc.*, **2007**, *129*, 15750–15751.

<sup>21</sup> Gigante, F.; Kaiser, M.; Brun, R.; Gilbert, I. H. *Bioorg. Med. Chem.*, **2010**, *18*, 7291–7301.



133.8 (s), 142.0 (s), 171.4 (s), 171.4 (s). MS (EI, 110 °C):  $m/z$  (%) = 270 (6) [ $M^+$ ], 136 (4), 135 (35), 107 (25), 92 (10), 91 (100), 90 (11), 89 (9), 79 (4), 77 (9), 65 (14). HRMS ( $^{12}C_{16}^1H_{14}^{16}O_4$ , EI): calcd. 270.0892 amu; found 270.0893 amu.  $C_{16}H_{14}O_4$  (270.09): calcd. C 71.10, H 5.22; found C 70.72, H 5.02.

**4-(Benzoyloxymethyl)benzoic acid (29).** 4-(Hydroxymethyl)benzoic acid (**26**) and PhCN were reacted according to GP 3. Chromatography ( $CH_2Cl_2/MeOH/AcOH$ , 100:10:1) afforded **29** (60 mg, 31%) as a white solid.  $R_f$  = 0.31 (MeOH/ $CH_2Cl_2$ , 19:1) IR (ATR):  $\tilde{\nu}$  ( $cm^{-1}$ ) = 2955 (w), 2660 (w), 2540 (w), 1715 (w, C=O), 1677 (w, C=O), 1425 (w), 1264 (m), 1095 (w), 1069 (w), 935 (w), 756 (w), 699 (w).  $^1H$  NMR (400 MHz,  $CDCl_3$ )  $\delta$  5.45 (s, 2H,  $CH_2$ ), 7.47 (t,  $^3J$  = 7.7 Hz, 2H, Ph), 7.55 (d,  $^3J$  = 8.3 Hz, 2H, Ar), 7.59 (t,  $^3J$  = 7.4 Hz,  $^4J$  = 1.5 Hz, 1H, Ph), 8.10 (dd,  $^3J$  = 8.4 Hz,  $^4J$  = 1.4 Hz, 2H, Ph), 8.14 (d,  $^3J$  = 8.3 Hz, 2H, Ar), 10.8 (bs, 1H, COOH).  $^{13}C$  NMR (100 MHz,  $CDCl_3$ )  $\delta$  66.0 (t), 127.8 (d), 128.6 (d), 129.2 (s), 129.9 (d), 130.7 (d), 133.4 (d), 142.2 (s), 166.4 (s), 171.9 (s), one signal (s) covered. MS (EI, 100 °C):  $m/z$  (%) = 257 (6), 256 (42) [ $M^+$ ], 135 (30), 121 (10), 107 (26), 106 (13), 105 (100), 90 (7), 89 (10), 79 (9), 78 (6), 77 (52), 51 (15), 43 (13). HRMS ( $^{12}C_{15}^1H_{12}^{16}O_4$ , EI): calcd. 256.0736 amu; found 256.0734 amu.

**4-(Acryloyloxymethyl)benzoic acid (30).** 4-(Hydroxymethyl)benzoic acid (**26**) and acrylonitrile were reacted according to GP 1. Chromatography ( $CH_2Cl_2/MeOH/AcOH$ , 100:10:1) afforded **30** (98 mg, 64%) as a white solid.  $R_f$  = 0.27 (MeOH/ $CH_2Cl_2$ , 19:1).  $^1H$  NMR (400 MHz,  $CDCl_3$ )  $\delta$  5.28 (s, 2H,  $OCH_2$ ), 5.90 (d,  $^3J$  = 10.4 Hz, 1H, 3- $H_{cis}$ ), 6.20 (dd,  $^3J$  = 10.4 Hz,  $^3J$  = 17.3 Hz, 1H, 2-H), 6.49 (d,  $^3J$  = 17.3 Hz, 1H, 3- $H_{trans}$ ), 7.48 (d,  $^3J$  = 7.8 Hz, 2H, Ar), 8.12 (d,  $^3J$  = 7.8 Hz, 2H, Ar), 11.4 (bs, 1H, COOH).  $^{13}C$  NMR (100 MHz,  $CDCl_3$ )  $\delta$  65.6 (t), 127.9 (d), 128.1 (d), 129.2 (s), 130.7 (d), 131.8 (t), 142.1 (s), 166.0 (s), 171.6 (s).

**Hexane-1,6-diyl diacetate (32) and 6-hydroxyhexyl acetate (33).** 1,6-Hexanediol (**31**) and MeCN were reacted according to GP 1 with 4 equivalents of TMSOTf. Chromatography (hexanes/EtOAc, 9:1) afforded **32** (48 mg, 32%) as a colourless oil.  $R_f$  = 0.45 (hexanes/EtOAc, 3:1).  $^1H$  NMR (300 MHz,  $CDCl_3$ )  $\delta$  1.33–1.42 (m, 4H, 3'- $H_2$ , 4'- $H_2$ ), 1.56–1.68 (m, 4H, 2'- $H_2$ , 5'- $H_2$ ), 2.04 (s, 6H, Me), 4.05 (t,  $^3J$  = 6.7 Hz, 4H, 1'- $H_2$ , 6'- $H_2$ ). The spectrum is in full agreement with published data.<sup>22</sup> **Side product: 6-Hydroxyhexyl acetate (33).** Chromatography (hexanes/EtOAc, 9:1) afforded **33** (22 mg, 19%) as a colourless oil.  $R_f$  = 0.29 (hexanes/EtOAc, 1:1).  $^1H$  NMR (300 MHz,  $CDCl_3$ )  $\delta$  1.36–1.45 (m, 4H, 3'- $H_2$ , 4'- $H_2$ ), 1.53–1.71 (m, 4H, 2'- $H_2$ , 5'- $H_2$ ), 1.90 (br s, 1H, OH), 2.05 (s, 3H, OAc), 3.65 (t,  $^3J$  = 6.5 Hz, 2H, 6'- $H_2$ ), 4.06 (t,  $^3J$  = 6.7 Hz, 2H, 1'- $H_2$ ). The spectrum is in full agreement with published data.<sup>23</sup>

<sup>22</sup> Miyamoto, K.; Tada, N.; Ochiai, M. *J. Am. Chem. Soc.*, **2007**, 2772–2773.

<sup>23</sup> Rawal, G. K.; Rani, S.; Kumar, A.; Vankar, Y. D. *Tetrahedron Lett.*, **2006**, 47, 9117–9120.

**Hexane-1,6-diyl bis(phenylacetate) (34) and 6-hydroxyhexyl phenylacetate (35).** 1,6 Hexanediol (**31**) and BnCN were reacted according to GP 3 with 4 equivalents of TMSOTf. Chromatography (hexanes/EtOAc, 9:1) afforded **34** (122 mg, 46%) as a colourless oil.  $R_f = 0.45$  (hexanes/EtOAc, 3:1).  $^1\text{H NMR}$  (300 MHz,  $\text{CDCl}_3$ )  $\delta$  1.24–1.36 (m, 4H, 3'-H<sub>2</sub>, 4'-H<sub>2</sub>), 1.52–1.64 (m, 4H, 2'-H<sub>2</sub>, 5'-H<sub>2</sub>), 3.61 (s, 4H,  $\text{CH}_2\text{Ph}$ ), 4.06 (t,  $^3J = 6.6$  Hz, 2H, 1'-H<sub>2</sub>, 6'-H<sub>2</sub>), 7.22–7.36 (m, 10H, Ph). The spectrum is in full agreement with published data.<sup>24</sup> **Side product: 6-Hydroxyhexyl phenylacetate (35):** Chromatography (hexanes/EtOAc, 9:1) afforded **35** (66 mg, 37%) as a colourless oil.  $R_f = 0.29$  (hexanes/EtOAc, 1:1).  $^1\text{H NMR}$  (300 MHz,  $\text{CDCl}_3$ )  $\delta$  1.29–1.40 (m, 4H, 3'-H<sub>2</sub>, 4'-H<sub>2</sub>), 1.49–1.58 (m, 2H, 5'-H<sub>2</sub>), 1.63 (tt,  $^3J = 6.9$  Hz,  $^3J = 6.8$  Hz, 2H, 2'-H<sub>2</sub>), 3.61 (s, 2H,  $\text{CH}_2\text{Ph}$ ), 3.62 (t,  $^3J = 6.5$  Hz, 2H, 6'-H<sub>2</sub>), 4.09 (t,  $^3J = 6.6$  Hz, 2H, 1'-H<sub>2</sub>), 7.23–7.36 (m, 5H, Ph). The spectrum is in full agreement with published data.<sup>25</sup>

**Ethyl 6-acetoxyhexanoate (37).** Ethyl 6-hydroxyhexanoate (**36**) and MeCN were reacted according to GP 1. Chromatography (hexanes/EtOAc, 9:1) afforded **37** (32 mg, 21%) as a colourless oil.  $R_f = 0.47$  (hexanes/EtOAc, 3:1).  $^1\text{H NMR}$  (300 MHz,  $\text{CDCl}_3$ )  $\delta$  1.25 (t,  $^3J = 7.1$  Hz, 3H,  $\text{CH}_2\text{CH}_3$ ), 1.32–1.44 (m, 2H, 4-H<sub>2</sub>), 1.59–1.71 (m, 4H, 3-H<sub>2</sub>, 5-H<sub>2</sub>), 2.04 (s, 3H, OAc), 2.30 (t,  $^3J = 7.5$  Hz, 2H, 2-H<sub>2</sub>), 4.05 (t,  $^3J = 6.6$  Hz, 2H, 6-H<sub>2</sub>), 4.12 (q,  $^3J = 7.1$  Hz, 2H,  $\text{CH}_2\text{CH}_3$ ). The spectrum is in full agreement with published data.<sup>26</sup>

**Ethyl 6-(phenylacetoxy)hexanoate (38).** Ethyl 6-hydroxyhexanoate (**36**) and BnCN were reacted according to GP 3. Chromatography (hexanes/EtOAc, 9:1) afforded **38** (33 mg, 16%) as a yellowish oil.  $R_f = 0.44$  (hexanes/EtOAc, 3:1). IR (KBr):  $\tilde{\nu}$  ( $\text{cm}^{-1}$ ) = 3444 (w), 2940 (m), 1733 (s, C=O), 1455 (w), 1249 (m), 1110 (s), 1031 (m), 698 (w), 617 (m).  $^1\text{H NMR}$  (400 MHz,  $\text{CDCl}_3$ )  $\delta$  1.25 (t,  $^3J = 7.1$  Hz, 3H, Me), 1.29–1.39 (m, 2H, 4-H<sub>2</sub>), 1.58–1.67 (m, 4H, 3-H<sub>2</sub>, 5-H<sub>2</sub>), 2.27 (t,  $^3J = 7.5$  Hz, 2H, 2-H<sub>2</sub>), 3.61 (s, 2H,  $\text{CH}_2\text{Ph}$ ), 4.08 (t,  $^3J = 6.6$  Hz, 2H, 6-H<sub>2</sub>), 4.12 (q,  $^3J = 7.1$  Hz, 2H,  $\text{CH}_2\text{CH}_3$ ), 7.23–7.35 (m, 5H, Ph).  $^{13}\text{C NMR}$  (100 MHz,  $\text{CDCl}_3$ )  $\delta$  14.4 (q), 24.7 (t), 25.6 (t), 28.4 (t), 34.3 (t), 41.6 (t), 60.4 (t), 64.8 (t), 127.2 (d), 128.7 (2 d), 129.4 (2 d), 134.3 (s), 171.8 (s), 173.7 (s). MS (EI, 40 °C):  $m/z$  (%) = 278 (15) [ $\text{M}^+$ ], 118 (100), 115 (15), 91 (60), 69 (16). HRMS ( $^{12}\text{C}_{16}^1\text{H}_{22}^{16}\text{O}_4$ , EI): calcd. 278.1518 amu; found 278.1516. amu.

**6-Ethoxy-6-oxohexyl benzoate (39).** Ethyl 6-hydroxyhexanoate (**36**) and PhCN were reacted according to GP 3. Chromatography (hexanes/EtOAc, 9:1) afforded **39** (21 mg, 10%) as a yellowish oil.  $R_f = 0.44$  (hexanes/EtOAc, 3:1). IR (KBr):  $\tilde{\nu}$  ( $\text{cm}^{-1}$ ) = 3440 (w), 2940 (w), 1721 (m, C=O), 1275 (m), 1113 (s),

<sup>24</sup> Twibanire, J.-d'A. K.; Grindley, T. B. *Org. Lett.*, **2011**, *13*, 2988–2991.

<sup>25</sup> Tabenkin, B.; Lehr, H.; Wayman, A. C.; Goldberg, M. W. *Arch. Biochem. Biophys.*, **1952**, *38*, 43–48.

<sup>26</sup> Yamashita M.; Takemoto, Y.; Ihara, E.; Yasuda, H. *Macromolecules*, **1996**, *29*, 1798–1806.

713 (m), 618 (m).  $^1\text{H}$  NMR (400 MHz,  $\text{CDCl}_3$ )  $\delta$  1.25 (t,  $^3J = 7.1$  Hz, 3H,  $\text{CH}_2\text{CH}_3$ ), 1.44–1.54 (m, 2H, 4'-H<sub>2</sub>), 1.71 (tt,  $^3J = 7.5$  Hz,  $^3J = 7.7$  Hz, 2H, 3'-H<sub>2</sub>), 1.79 (tt,  $^3J = 6.6$  Hz,  $^3J = 7.6$  Hz, 2H, 5'-H<sub>2</sub>), 2.33 (t,  $^3J = 7.5$  Hz, 2H, 2'-H<sub>2</sub>), 4.12 (q,  $^3J = 7.1$  Hz, 2H,  $\text{CH}_2\text{CH}_3$ ), 4.32 (t,  $^3J = 6.6$  Hz, 2H, 6'-H<sub>2</sub>), 7.44 (t,  $^3J = 7.7$  Hz, 2H, Ph), 7.55 (t,  $^3J = 7.4$  Hz, 1H, Ph), 8.04 (d,  $^3J = 7.9$  Hz, 2H, Ph).  $^{13}\text{C}$  NMR (100 MHz,  $\text{CDCl}_3$ )  $\delta$  14.4 (q), 24.8 (t), 25.8 (t), 28.6 (t), 34.4 (t), 60.4 (t), 64.9 (t), 128.5 (2 d), 129.7 (2 d), 130.5 (s), 133.0 (d), 166.8 (s), 173.7 (s). MS (EI, 40 °C):  $m/z$  (%) = 264 (8) [ $\text{M}^+$ ], 142 (49), 105 (100), 88 (12), 77 (14). HRMS ( $^{12}\text{C}_{15}\text{H}_{20}\text{O}_4$ , EI): calcd. 264.1362 amu; found 264.1360 amu.

**Ethyl 6-(acryloyloxy)hexanoate (40).** Ethyl 6-hydroxyhexanoate (**36**) and acrylonitrile were reacted according to GP 1. Chromatography (hexanes/EtOAc, 9:1) afforded **40** (12 mg, 7%) as a colourless oil.  $R_f = 0.38$  (hexanes/EtOAc, 3:1). IR (KBr):  $\tilde{\nu}$  ( $\text{cm}^{-1}$ ) = 3439 (w), 2942 (m), 1729 (s, C=O), 1409 (m), 1192 (m), 811 (w), 618 (w).  $^1\text{H}$  NMR (400 MHz,  $\text{CDCl}_3$ )  $\delta$  1.25 (t,  $^3J = 7.1$  Hz, 3H,  $\text{CH}_2\text{CH}_3$ ), 1.36–1.45 (m, 2H, 4-H<sub>2</sub>), 1.61–1.73 (m, 4H, 3-H<sub>2</sub>, 5-H<sub>2</sub>), 2.31 (t,  $^3J = 7.5$  Hz, 2H, 2-H<sub>2</sub>), 4.12 (q,  $^3J = 7.1$  Hz, 2H,  $\text{CH}_2\text{CH}_3$ ), 4.15 (t,  $^3J = 6.7$  Hz, 2H, 6-H<sub>2</sub>), 5.81 (dd,  $^3J = 10.4$  Hz,  $^2J = 1.3$  Hz, 1H, 3'-H<sub>trans</sub>), 6.11 (dd,  $^3J = 17.3$  Hz,  $^3J = 10.4$  Hz, 1H, 2'-H<sub>o</sub>), 6.39 (dd,  $^3J = 17.3$  Hz,  $^2J = 1.3$  Hz, 1H, 3'-H<sub>cis</sub>).  $^{13}\text{C}$  NMR (100 MHz,  $\text{CDCl}_3$ )  $\delta$  14.4 (q), 24.7 (t), 25.7 (t), 28.4 (t), 34.3 (t), 60.4 (t), 64.5 (t), 128.7 (d), 130.7 (t), 166.4 (s), 173.7 (s). MS (EI, 30 °C):  $m/z$  (%) = 214 (1) [ $\text{M}^+$ ], 169 (21) [ $\text{M}^+ - \text{OCH}_2\text{CH}_3$ ], 142 (58), 114 (11), 113 (13), 88 (25), 73 (14), 69 (16), 68 (26), 55 (100) [ $\text{OCHCH}_2$ ]. HRMS ( $^{12}\text{C}_{11}\text{H}_{18}\text{O}_4$ , EI): calcd. 214.1205 amu; found 214.1208 amu.

**4-(Benzyloxycarbonylamino)butyl acetate (42).** Benzyl 4-hydroxybutylcarbamate (**41**) and MeCN were reacted according to GP 1. Chromatography (hexanes/EtOAc, 2:1) afforded **42** (27 mg, 13%) as a colourless oil.  $R_f = 0.55$  (hexanes/EtOAc, 1:2).  $^1\text{H}$  NMR (300 MHz,  $\text{CDCl}_3$ )  $\delta$  1.50–1.73 (m, 4H, 2'-H<sub>2</sub>, 3'-H<sub>2</sub>), 2.04 (s, 3H, OAc), 3.23 (q,  $^3J = 6.4$  Hz, 2H, 1'-H<sub>2</sub>), 4.07 (t,  $^3J = 6.1$  Hz, 2H, 4'-H<sub>2</sub>), 4.79 (s, 1H, NH), 5.10 (s, 2H,  $\text{CH}_2\text{Ph}$ ), 7.28–7.39 (m, 5H, Ph). The spectrum is in full agreement with published data.<sup>27</sup>

**4-(Benzyloxycarbonylamino)butyl phenylacetate (43).** Benzyl 4-hydroxybutylcarbamate (**41**) and BnCN were reacted according to GP 3. Chromatography (hexanes/EtOAc, 3:1) afforded **43** (34 mg, 13%) as a yellowish oil.  $R_f = 0.71$  (hexanes/EtOAc, 1:2). IR (KBr):  $\tilde{\nu}$  ( $\text{cm}^{-1}$ ) = 3347 (m), 2951 (m), 1727 (s, C=O), 1530 (m), 1455 (m), 1253 (s), 1141 (m), 1027 (m), 727 (m), 697 (m).  $^1\text{H}$  NMR (400 MHz,  $\text{CDCl}_3$ )  $\delta$  1.51 (tt,  $^3J = 7.0$  Hz,  $^3J = 7.5$  Hz, 2H, 2'-H<sub>2</sub>), 1.64 (tt,  $^3J = 7.4$  Hz,  $^3J = 6.5$  Hz, 2H, 3'-H<sub>2</sub>), 3.18 (q,  $^3J = 6.6$  Hz, 2H, 1'-H<sub>2</sub>), 3.61 (s, 2H,  $\text{CCH}_2\text{Ph}$ ), 4.10 (t,  $^3J = 6.4$  Hz, 2H, 4'-H<sub>2</sub>), 4.72 (s,

<sup>27</sup> Kometani, M.; Ihara, K.; Kimura, R.; Kinoshita, H. *Bull., Chem. Soc. Jpn.* **2009**, *82*, 364–380.

1H, NH), 5.10 (s, 2H, OCH<sub>2</sub>Ph), 7.23–7.40 (m, 10H, Ph). <sup>13</sup>C NMR (100 MHz, CDCl<sub>3</sub>) δ 25.9 (t), 26.7 (t), 40.7 (t), 41.6 (t), 64.5 (t), 66.8 (t), 127.2 (2 d), 128.3 (2 d), 128.7 (2 d), 128.7 (2 d), 129.4 (2 d), 134.2 (s), 136.7 (s), 156.5 (s), 171.7 (s). MS (EI, 80 °C): *m/z* (%) = 341 (5) [M<sup>+</sup>], 180 (12), 118 (11), 108 (64), 107 (23), 92 (15), 91 (100). HRMS (<sup>12</sup>C<sub>20</sub><sup>1</sup>H<sub>23</sub><sup>14</sup>N<sup>16</sup>O<sub>4</sub>, EI): calcd. 341.1627 amu; found 341.1625 amu.

**4-(Benzyloxycarbonylamino)butyl acrylate (44).** Benzyl 4-hydroxybutylcarbamate (**41**) and acrylonitrile were reacted according to GP 1. Chromatography (hexanes/EtOAc, 1:1) afforded **44** (30 mg, 14%) as a yellowish oil. *R<sub>f</sub>* = 0.62 (hexanes/EtOAc, 1:2). IR (KBr):  $\tilde{\nu}$  (cm<sup>-1</sup>) = 3346 (m), 2954 (m), 1723 (m, C=O), 1532 (m), 1454 (m), 1410 (m), 1256 (m), 1194 (m), 1135 (m), 1062 (w), 1027 (w), 985 (w), 812 (w), 739 (w), 698 (w). <sup>1</sup>H NMR (400 MHz, CDCl<sub>3</sub>) δ 1.52–1.76 (m, 4H, 2'-H<sub>2</sub>, 3'-H<sub>2</sub>), 3.24 (q, <sup>3</sup>*J* = 6.6 Hz, 2H, 1'-H<sub>2</sub>), 4.17 (t, <sup>3</sup>*J* = 6.3 Hz, 2H, 4'-H<sub>2</sub>), 4.81 (s, 1H, NH), 5.09 (s, 2H, CH<sub>2</sub>Ph), 5.82 (dd, <sup>3</sup>*J* = 10.4 Hz, <sup>2</sup>*J* = 1.4 Hz, 1H, 3-H<sub>trans</sub>), 6.11 (dd, <sup>3</sup>*J* = 17.3 Hz, <sup>3</sup>*J* = 10.4 Hz, 1H, 2-H), 6.40 (dd, <sup>3</sup>*J* = 17.3 Hz, <sup>2</sup>*J* = 1.4 Hz, 1H, 3-H<sub>cis</sub>), 7.28–7.40 (m, 5H, Ph). <sup>13</sup>C NMR (100 MHz, CDCl<sub>3</sub>) δ 26.1 (t), 26.8 (t), 40.8 (t), 64.2 (t), 66.8 (t), 128.0 (2 d), 128.3 (d), 128.6 (d), 128.7 (2 d), 130.9 (t), 136.7 (s), 156.5 (s), 166.3 (s). MS (EI, 50 °C): *m/z* (%) = 277 (1) [M<sup>+</sup>], 205 (51), 160 (10), 98 (14), 92 (12), 91 (100), 65 (9). HRMS (<sup>12</sup>C<sub>15</sub><sup>1</sup>H<sub>19</sub><sup>14</sup>N<sup>16</sup>O<sub>4</sub>, EI): calcd. 277.1314 amu; found 277.1317 amu.

**Cyclohexyl acetate (46).** Cyclohexanol (**45**) and MeCN were reacted according to GP 1. Chromatography (hexanes/EtOAc, 9:1) afforded **46** (16 mg, 15%) as a colourless oil. *R<sub>f</sub>* = 0.50 (hexanes/EtOAc, 3:1). <sup>1</sup>H NMR (300 MHz, CDCl<sub>3</sub>) δ 1.19–1.42 (m, 5H, 3'-H<sub>2</sub>, 4'-H<sub>a</sub>H<sub>b</sub>, 5'-H<sub>2</sub>), 1.48–1.58 (m, 1H, 4'-H<sub>a</sub>H<sub>b</sub>), 1.65–1.76 (m, 2H, 2'-H<sub>2</sub> and/or 6'-H<sub>2</sub>), 1.79–1.90 (m, 2H, 2'-H<sub>2</sub> and/or 6'-H<sub>2</sub>), 2.02 (s, 3H, Me), 4.72 (tt, <sup>3</sup>*J* = 4.2 Hz, <sup>3</sup>*J* = 9.1 Hz, 1H, 1'-H). The spectrum is in full agreement with published data.<sup>28</sup>

**Cyclohexyl phenylacetate (47).** Cyclohexanol (**45**) and BnCN were reacted according to GP 3. Chromatography (hexanes/EtOAc, 9:1) afforded **47** (42 mg, 25%) as a colourless oil. *R<sub>f</sub>* = 0.59 (hexanes/EtOAc, 3:1). <sup>1</sup>H NMR (300 MHz, CDCl<sub>3</sub>) δ 1.19–1.56 (m, 6H, 3'-H<sub>2</sub>, 4'-H<sub>2</sub>, 5'-H<sub>2</sub>), 1.61–1.71 (m, 2H, 2'-H<sub>2</sub> and/or 6'-H<sub>2</sub>), 1.76–1.88 (m, 2H, 2'-H<sub>2</sub> and/or 6'-H<sub>2</sub>), 3.60 (s, 2H, 2-H<sub>2</sub>), 4.77 (tt, <sup>3</sup>*J* = 3.7 Hz, <sup>3</sup>*J* = 8.8 Hz, 1H, 1'-H), 7.22–7.36 (m, 5H, Ph). The spectrum is in full agreement with published data.<sup>29</sup>

**2-(4-Hydroxyphenyl)ethyl acetate (54).** 4-(2-Hydroxyethyl)phenol (**53**) and MeCN were reacted according to GP 3. Chromatography (hexanes/EtOAc, 4:1) afforded **54** (89 mg, 65%) as a yellowish oil.

<sup>28</sup> Débieux, J.-L.; Cosandey, A.; Helgen, C.; Bochet, C. G. *Eur. J. Org. Chem.*, **2007**, 2073–2077.

<sup>29</sup> Yang, C.-G.; He, C. *J. Am. Chem. Soc.*, **2005**, *127*, 6966–6967.

$R_f = 0.24$  (hexanes/EtOAc, 3:1).  $^1\text{H NMR}$  (300 MHz,  $\text{CDCl}_3$ )  $\delta$  2.04 (s, 3H, Me), 2.86 (t,  $^3J = 7.1$  Hz, 2H, 2'-H<sub>2</sub>), 4.24 (t,  $^3J = 7.1$  Hz, 2H, 1'-H<sub>2</sub>), 6.77 (d,  $^3J = 8.4$  Hz, 2H, Ar), 7.08 (d,  $^3J = 8.4$  Hz, 2H, Ar). The spectrum is in full agreement with published data.<sup>30</sup>

**2-(4-Hydroxyphenyl)ethyl phenylacetate, monaspilosin (55).** 4-(2-Hydroxyethyl)phenol (**53**) and BnCN were reacted according to GP 3. Chromatography (hexanes/EtOAc, 4:1) afforded **55** (142 mg, 73%) as a colourless wax.  $R_f = 0.24$  (hexanes/EtOAc, 3:1). IR (ATR):  $\tilde{\nu}$  ( $\text{cm}^{-1}$ ) = 3315 (m), 2955 (w), 1690 (s, C=O), 1594 (m), 1514 (m), 1452 (m), 1221 (s), 1147 (s), 1015 (s).  $^1\text{H NMR}$  (400 MHz,  $\text{CDCl}_3$ )  $\delta$  2.84 (t,  $^3J = 7.0$  Hz, 2H, 2'-H<sub>2</sub>), 3.61 (s, 2H, PhCH<sub>2</sub>), 4.26 (t,  $^3J = 7.0$  Hz, 2H, 1'-H<sub>2</sub>), 5.21 (s, 1H, OH), 6.72 (d,  $^3J = 8.5$  Hz, 2H, Ar), 6.99 (d,  $^3J = 8.5$  Hz, 2H, Ar), 7.22–7.35 (m, 5H, Ph).  $^{13}\text{C NMR}$  (100 MHz,  $\text{CDCl}_3$ )  $\delta$  34.3 (t), 41.6 (t), 65.8 (t), 115.5 (2 d), 127.2 (d), 128.7 (2 d), 129.4 (2 d), 129.9 (s), 130.2 (2 d), 134.1 (s), 154.4 (s), 171.9 (s). MS (EI, 100 °C):  $m/z$  (%) = 256 (4) [ $\text{M}^+$ ], 121 (40), 120 (100), 107 (49), 91 (72), 77 (16). HRMS ( $^{12}\text{C}_{16}\text{H}_{16}\text{O}_3$ , ED): calcd. 256.1099 amu; found 256.1101 amu.  $\text{C}_{16}\text{H}_{16}\text{O}_3$  (256.11): calcd. C 74.98, H 6.29; found C 74.90, H 6.28.

**Benzyl acetate (57) and N-benzylacetamide (58).** Benzyl alcohol (**56**) and MeCN were reacted according to GP 1. Chromatography (hexanes/EtOAc, 9:1) afforded **57** (47 mg, 41%) as a colourless oil.  $R_f = 0.50$  (hexanes/EtOAc, 3:1).  $^1\text{H NMR}$  (300 MHz,  $\text{CDCl}_3$ )  $\delta$  2.11 (s, 3H, Me), 5.11 (s, 2H, CH<sub>2</sub>), 7.28–7.40 (m, 5H, Ph). The spectrum is in full agreement with published data.<sup>31</sup> **Side product: N-Benzylacetamide (58):** Chromatography (hexanes/EtOAc, 1:3) afforded **58** (20 mg, 18%) as a white solid.  $R_f = 0.21$  (hexanes/EtOAc, 1:2).  $^1\text{H NMR}$  (300 MHz,  $\text{CDCl}_3$ )  $\delta$  2.00 (s, 3H, CH<sub>3</sub>), 4.41 (d,  $^3J = 5.7$  Hz, 2H, CH<sub>2</sub>), 5.97 (s, 1H, NH), 7.23–7.40 (m, 5H, Ph). The spectrum is in full agreement with published data.<sup>32</sup>

**Benzyl phenylacetate (59) and N-benzyl-phenylacetamide (60).** Benzyl alcohol (**56**) and BnCN were reacted according to GP 3. Chromatography (hexanes/EtOAc, 1:2) afforded amide **60** (100 mg, 59%) as a white solid.  $R_f = 0.71$  (hexanes/EtOAc, 1:2).  $^1\text{H NMR}$  (300 MHz,  $\text{CDCl}_3$ )  $\delta$  3.63 (s, 2H, PhCH<sub>2</sub>CO), 4.41 (d,  $^3J = 5.8$  Hz, 2H, NHCH<sub>2</sub>Ph), 5.71 (s, 1H, NH), 7.18 (d,  $^3J = 6.5$  Hz, 2H, Ph), 7.21–7.40 (m, 8H, Ph). The spectrum is in full agreement with published data.<sup>33</sup> **Side product: Benzyl phenylacetate (59):** Chromatography (hexanes/EtOAc, 9:1) afforded **59** (30 mg, 18%) as a yellowish oil.  $R_f = 0.53$

<sup>30</sup> Seidel, G.; Laurich, D.; Fürstner, A. *J. Org. Chem.*, **2004**, *69*, 3950–3952.

<sup>31</sup> Débieux, J.-L.; Cosandey, A.; Helgen, C.; Bochet, C. G. *Eur. J. Org. Chem.*, **2007**, 2073–2077.

<sup>32</sup> Bia, N.-M.; Rena, M.-G.; Song, Q.-H. *Synth. Commun.*, **2010**, *40*, 2617–2623.

<sup>33</sup> Chen, Z.-W.; Jiang, H.-F.; Pan, X.-Y.; He, Z.-J. *Tetrahedron*, **2011**, *67*, 5920–5927.

(hexanes/EtOAc, 3:1).  $^1\text{H}$  NMR (300 MHz,  $\text{CDCl}_3$ )  $\delta$  3.68 (s, 2H,  $\text{PhCH}_2\text{CO}$ ), 5.14 (s, 2H,  $\text{OCH}_2$ ), 7.19–7.45 (m, 10H, Ph). The spectrum is in full agreement with published data.<sup>34</sup>

***N*-Benzylbenzamide (61).** Benzyl alcohol (**56**) and PhCN were reacted according to GP 3. Chromatography (hexanes/EtOAc, 1:2) afforded **61** (105 mg, 66%) as a white solid.  $R_f = 0.70$  (hexanes/EtOAc, 1:2).  $^1\text{H}$  NMR (300 MHz,  $\text{CDCl}_3$ )  $\delta$  4.66 (d,  $^3J = 5.6$  Hz, 2H,  $\text{CH}_2$ ), 6.39 (s, 1H, NH), 7.28–7.53 (m, 8H, Ph), 7.79 (d,  $^3J = 7.6$  Hz, 2H, Ph). The spectrum is in full agreement with published data.<sup>35</sup>

**Benzyl acrylate (62) and *N*-benzylacrylamide (63).** Benzyl alcohol (**56**) and acrylonitrile were reacted according to GP 1. Chromatography (hexanes/EtOAc, 1:1) afforded **63** (110 mg, 90%) as a white solid.  $R_f = 0.40$  (hexanes/EtOAc, 1:2).  $^1\text{H}$  NMR (300 MHz,  $\text{CDCl}_3$ )  $\delta$  4.52 (d,  $^3J = 5.8$  Hz, 2H,  $\text{NHCH}_2\text{Ph}$ ), 5.67 (dd,  $^3J = 10.2$  Hz,  $^2J = 1.4$  Hz, 1H, 3- $\text{H}_{\text{trans}}$ ), 5.93 (s, 1H, NH), 6.11 (dd,  $^3J = 17.0$  Hz, 10.2 Hz, 1H, 2-H), 6.33 (dd,  $^3J = 17.0$  Hz,  $^2J = 1.4$  Hz), 7.27–7.38 (m, 5H, Ph). The spectrum is in full agreement with published data.<sup>36</sup> **Side product: Benzyl acrylate (62):** Chromatography (hexanes/EtOAc, 1:1) afforded **62** (5 mg, 4%) as a colourless oil.  $R_f = 0.60$  (hexanes/EtOAc, 3:1).  $^1\text{H}$  NMR (300 MHz,  $\text{CDCl}_3$ )  $\delta$  5.20 (s, 2H,  $\text{CH}_2$ ), 5.85 (dd,  $^2J = 1.5$  Hz,  $^3J = 10.4$  Hz, 1H, 3- $\text{H}_{\text{trans}}$ ), 6.17 (dd,  $^3J = 10.4$  Hz,  $^3J = 17.3$  Hz, 1H, 2-H), 6.46 (dd,  $^3J = 1.5$  Hz,  $^3J = 17.3$  Hz, 1H, 3- $\text{H}_{\text{cis}}$ ), 7.28–7.41 (m, 5H, Ph). The spectrum is in full agreement with published data.<sup>37</sup>

**4-Fluorobenzyl acetate (65) and *N*-(4-fluorobenzyl)acetamide (66).** 4-Fluorobenzyl alcohol (**64**) and MeCN were reacted according to GP 1. Chromatography (hexanes/EtOAc, 3:1) afforded **66** (80 mg, 63%) as a white solid.  $R_f = 0.13$  (hexanes/EtOAc, 1:2).  $^1\text{H}$  NMR (300 MHz, acetone- $\text{D}_6$ )  $\delta$  1.93 (s, 3H,  $\text{CH}_3$ ), 4.34 (d,  $^3J = 6.0$  Hz, 2H,  $\text{CH}_2\text{Ar}$ ), 7.05 (t,  $^3J = 8.8$  Hz, 2H, Ar), 7.33 (dd,  $^4J = 5.6$  Hz,  $^3J = 8.5$  Hz, 2H, Ar), 7.64 (s, 1H, NH). The spectrum is in full agreement with published data.<sup>38</sup> **Side product: 4-Fluorobenzyl Acetate (65):** Chromatography (hexanes/EtOAc, 2:1) afforded **65** (37 mg, 29%) as a colourless oil.  $R_f = 0.44$  (hexanes/EtOAc, 3:1).  $^1\text{H}$  NMR (300 MHz,  $\text{CDCl}_3$ )  $\delta$  2.09 (s, 3H, Me), 5.07 (s, 2H,  $\text{CH}_2$ ), 7.05 (t,  $^3J = 8.6$  Hz, 2H, Ar), 7.34 (dd,  $^3J = 8.3$  Hz,  $^4J = 5.6$  Hz, 2H, Ar). The spectrum is in full agreement with published data.<sup>39</sup>

<sup>34</sup> Ginisty, M.; Roy, M.-N.; Charette, A. B. *J. Org. Chem.*, **2008**, 73, 2542–2547.

<sup>35</sup> Matsumoto, K.; Hashimoto, S.; Uchida, T.; Okamoto, T.; Otani, S. *Chem. Ber.*, **1989**, 122, 1357–1363.

<sup>36</sup> Miyabe, H.; Ueda, M.; Nishimura, A.; Naito, T. *Tetrahedron* **2004**, 60, 4227–4235.

<sup>37</sup> Grasa, G. A.; Güveli, T.; Singh, R.; Nolan, S. P. *J. Org. Chem.*, **2003**, 68, 2812–2819.

<sup>38</sup> Shine, S. J.; Yueh, W. *J. Org. Chem.*, **1994**, 59, 3553–3559.

<sup>39</sup> Kadam, S. T.; Kim, S. S. *Synthesis*, **2008**, 267–271.

***N*-(4-Fluorobenzyl)phenylacetamide (67).** 4-Fluorobenzyl alcohol (**64**) and BnCN were reacted according to GP 3. Chromatography (hexanes/EtOAc, 3:1) afforded **67** (146 mg, 79%) as a white solid.  $R_f = 0.18$  (hexanes/EtOAc, 2:1). IR (ATR):  $\tilde{\nu}$  ( $\text{cm}^{-1}$ ) = 3280 (m), 3061 (w), 1641 (s, C=O), 1603 (m), 1548 (m), 1504 (m), 1491 (m), 1452 (m), 1432 (m), 1224 (m), 1028 (m), 823 (m), 752 (m), 716 (m), 694 (s), 569 (m).  $^1\text{H}$  NMR (400 MHz,  $\text{CDCl}_3$ )  $\delta$  3.63 (s, 2H,  $\text{CH}_2\text{Ph}$ ), 4.37 (d,  $^3J = 5.8$  Hz, 2H,  $\text{CH}_2\text{Ar}$ ), 5.67 (s, 1H, NH), 6.97 (t,  $^3J = 8.6$  Hz, 2H, Ar), 7.15 (dd,  $^4J = 5.6$  Hz,  $^3J = 8.1$  Hz, 2H, Ar), 7.24–7.39 (m, 5H, Ph).  $^{13}\text{C}$  NMR (75 MHz,  $\text{CDCl}_3$ )  $\delta$  43.0 (t), 43.9 (t), 115.6 (2 d), 127.6 (d), 129.2 (2 d), 129.3 (2 d), 129.6 (2 d), 134.1 (s), 134.8 (s), 162.2 (s), 171.0 (s). MS (EI, 80 °C):  $m/z$  (%) = 244 (12), 243 (97) [ $\text{M}^+$ ], 109 (100), 92 (15), 91 (49). HRMS ( $^{12}\text{C}_{15}\text{H}_{14}\text{F}^{19}\text{N}^{16}\text{O}$ , EI): calcd. 243.1059 amu; found 243.1057 amu. Anal. calcd for  $\text{C}_{15}\text{H}_{14}\text{FNO}$  (243.11): C 74.06, H 5.80, N 5.76; found C 74.29, H 5.78, N 5.56.

***N*-(4-Fluorobenzyl)benzamide (68).** 4-Fluorobenzyl alcohol (**64**) and PhCN were reacted according to GP 3. Chromatography (hexanes/EtOAc, 1:1) afforded **68** (122 mg, 70%) as a white solid.  $R_f = 0.22$  (hexanes/EtOAc, 2:1).  $^1\text{H}$  NMR (300 MHz,  $\text{CDCl}_3$ )  $\delta$  4.63 (d,  $^3J = 5.7$  Hz, 2H,  $\text{CH}_2$ ), 6.40 (s, 1H, NH), 7.04 (t,  $^3J = 8.5$  Hz, 2H, Ar), 7.34 (dd,  $^4J = 5.6$  Hz,  $^3J = 8.1$  Hz, 2H, Ar), 7.39–7.55 (m, 3H, Ph), 7.79 (d,  $^3J = 7.9$  Hz, 2H, Ph). The spectrum is in full agreement with published data.<sup>40</sup>

***N*-(4-Fluorobenzyl)acrylamide (69).** 4-Fluorobenzyl alcohol (**64**) and acrylonitrile were reacted according to GP 1. Chromatography (hexanes/EtOAc, 1:2) afforded **69** (121 mg, 89%) as a white solid.  $R_f = 0.29$  (hexanes/EtOAc, 1:1). IR (ATR):  $\tilde{\nu}$  ( $\text{cm}^{-1}$ ) = 3270 (w), 1654 (m, C=O), 1620 (m), 1543 (m), 1509 (m), 1213 (m), 980 (m), 949 (m), 834 (m), 698 (m), 553 (m), 486 (m).  $^1\text{H}$  NMR (400 MHz,  $\text{CDCl}_3$ )  $\delta$  4.49 (d,  $^3J = 5.8$  Hz, 2H,  $\text{ArCH}_2$ ), 5.69 (dd,  $^3J = 10.3$  Hz,  $^2J = 1.3$  Hz, 1H, 3- $\text{H}_{\text{trans}}$ ), 6.10 (s, 1H, NH), 6.14 (dd,  $^3J = 17.0$  Hz,  $^3J = 10.3$  Hz, 1H, 2-H), 6.33 (dd,  $^3J = 17.0$  Hz,  $^2J = 1.3$  Hz, 1H, 3- $\text{H}_{\text{cis}}$ ), 7.03 (t,  $^3J = 8.6$  Hz, 2H, Ar), 7.25–7.32 (m, 2H, Ar).  $^{13}\text{C}$  NMR (400 MHz,  $\text{CDCl}_3$ )  $\delta$  43.1 (t), 115.7 (2 d), 127.1 (t), 129.7 (2 d), 130.7 (d), 134.0 (s), 162.3 (s), 165.6 (s). MS (EI, 60 °C):  $m/z$  (%) = 180 (14), 179 (100) [ $\text{M}^+$ ], 178 (18), 136 (9), 135 (38), 124 (37), 122 (10), 109 (45), 55 (31). HRMS ( $^{12}\text{C}_{10}\text{H}_{10}\text{F}^{19}\text{N}^{16}\text{O}$ , EI): calcd. 179.0746 amu; found 179.0744 amu.  $\text{C}_{10}\text{H}_{10}\text{FNO}$  (179.07): calcd. C 67.03, H 5.62, N 7.82; found C 66.84, H 5.58, N 7.69.

<sup>40</sup> Khalafi-Nezhad, A.; Foroughi, H. O.; Doroodmand, M. M.; Panahi, F. *J. Mater. Chem.*, **2011**, *21*, 12842–12851.

## B. $^1\text{H}$ and $^{13}\text{C}$ NMR spectra

### 1. (9*H*-Fluoren-9-yl)methyl acetate (2).

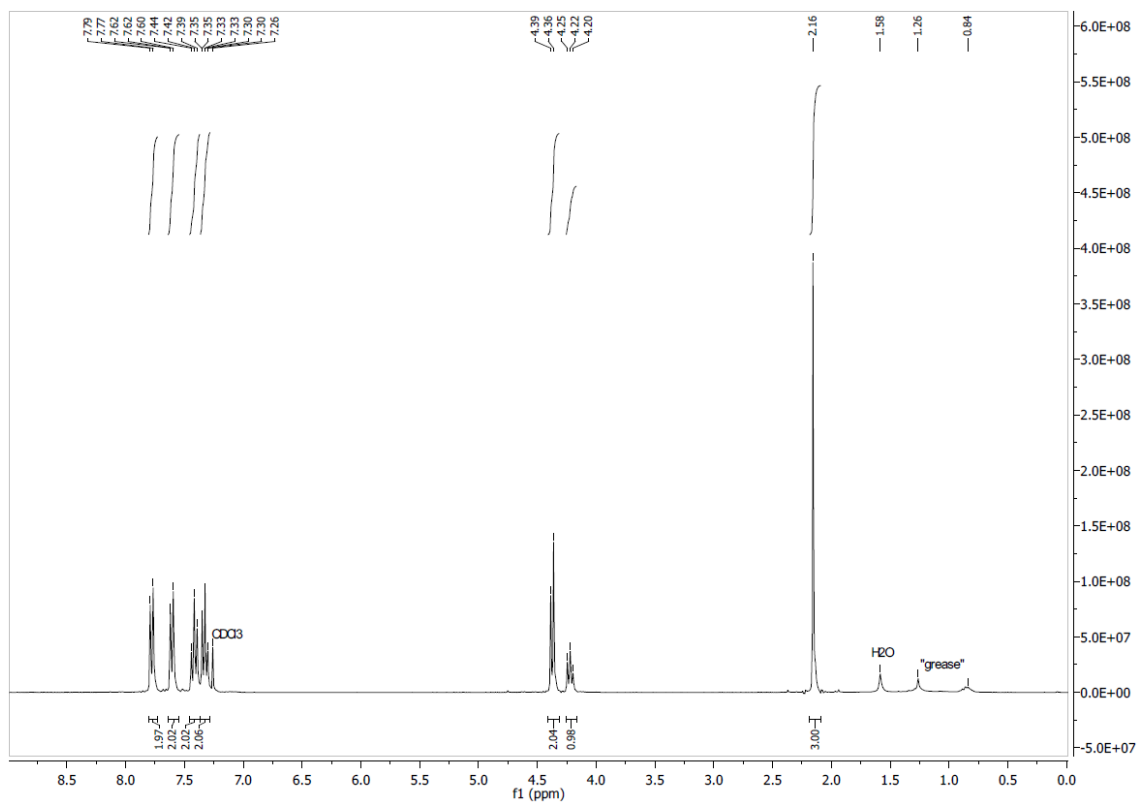



## 2. (9H-Fluoren-9-yl)methyl phenylacetate (3).

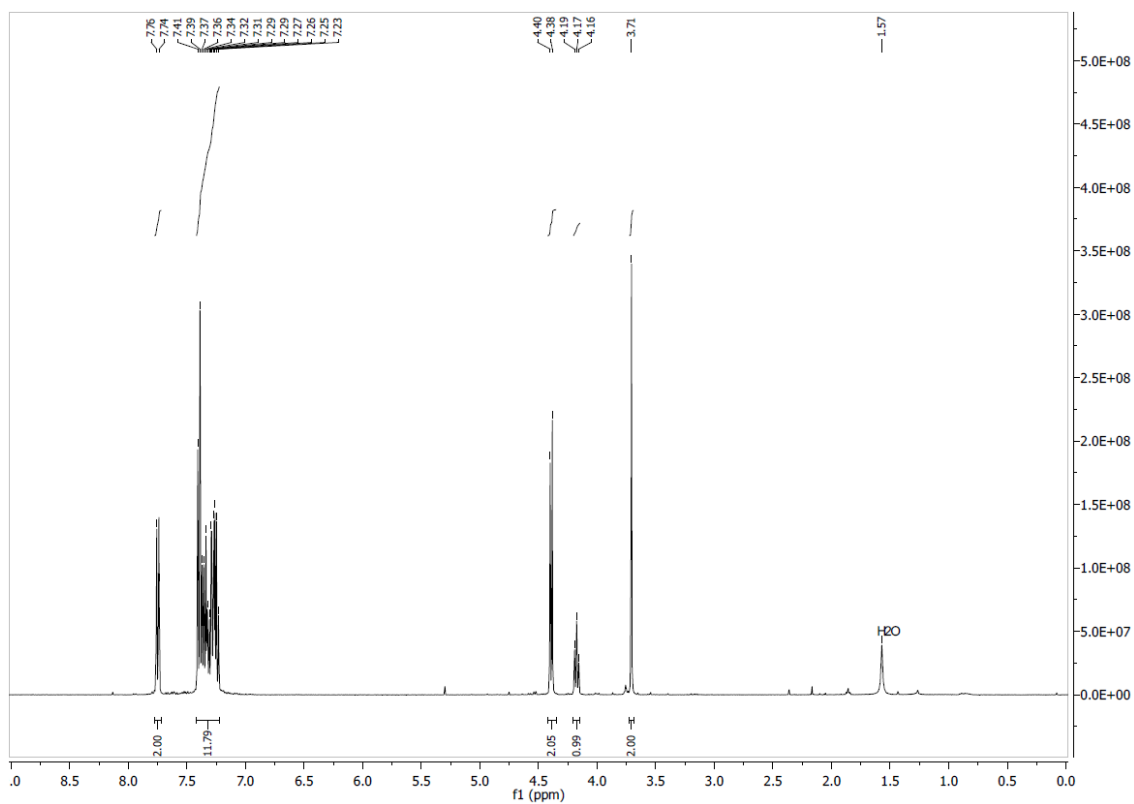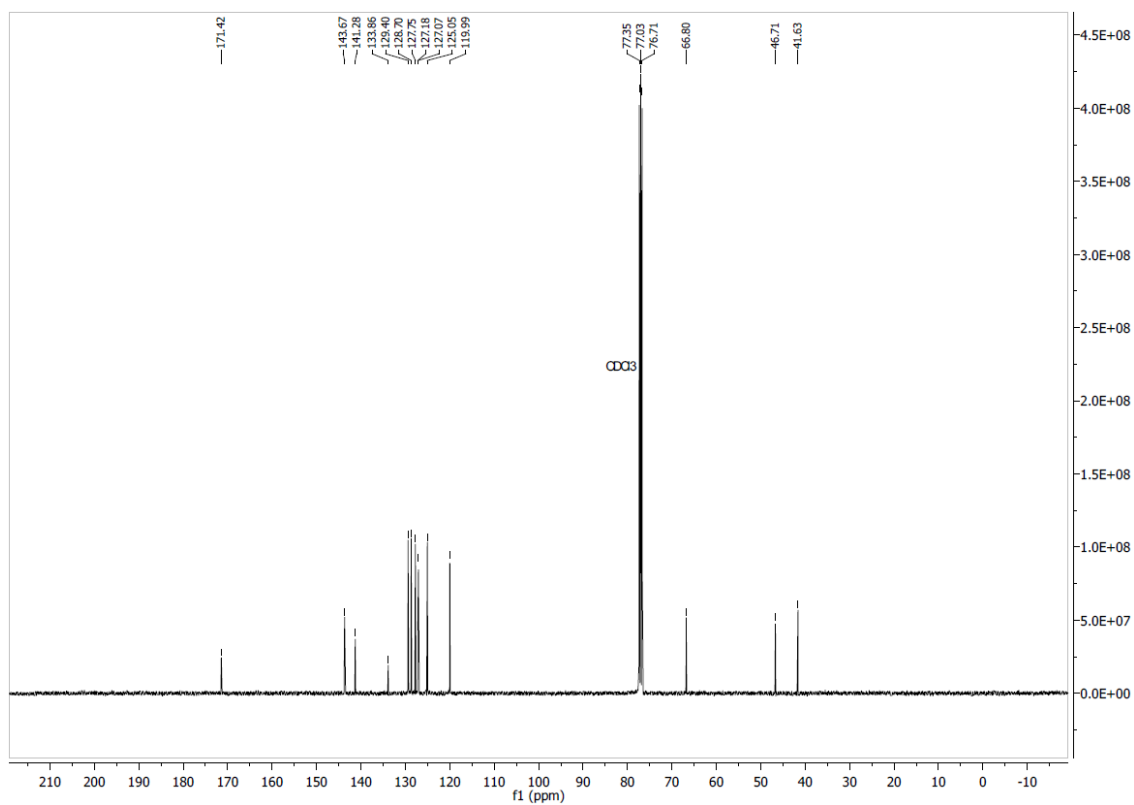

### 3. (9H-Fluoren-9-yl)methyl benzoate (4).

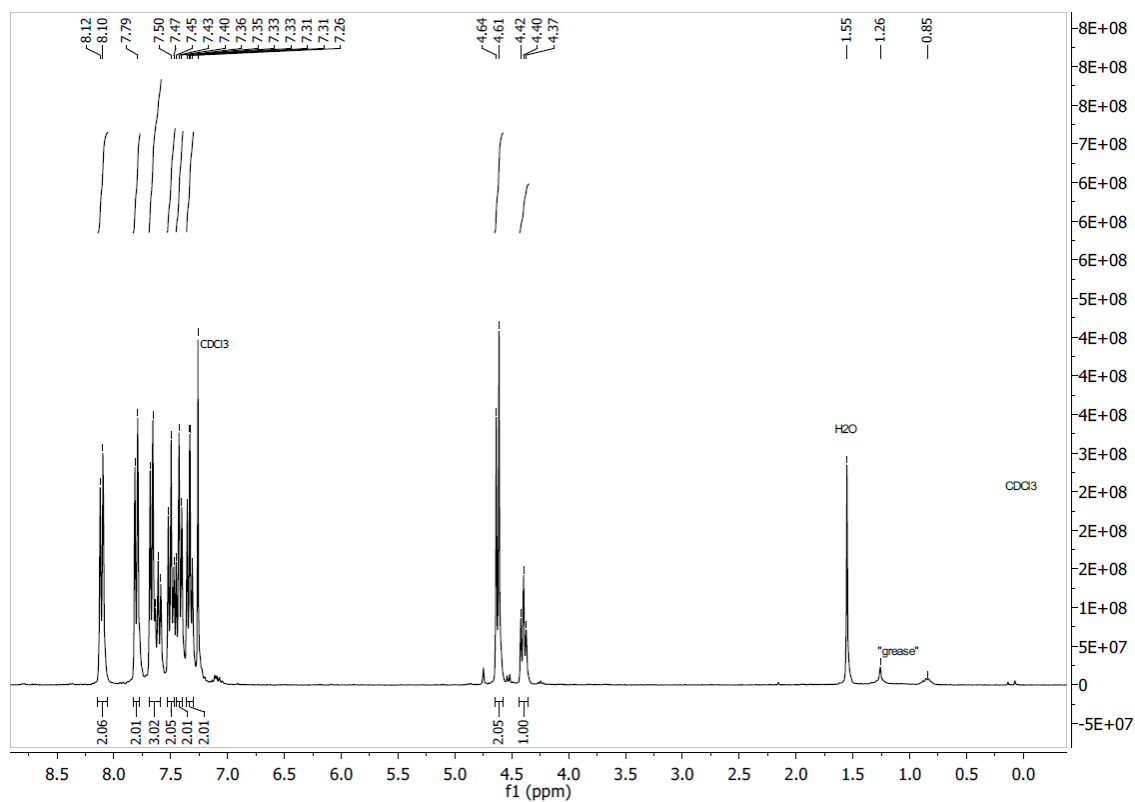

### 4. (9H-Fluoren-9-yl)methyl acrylate (5).

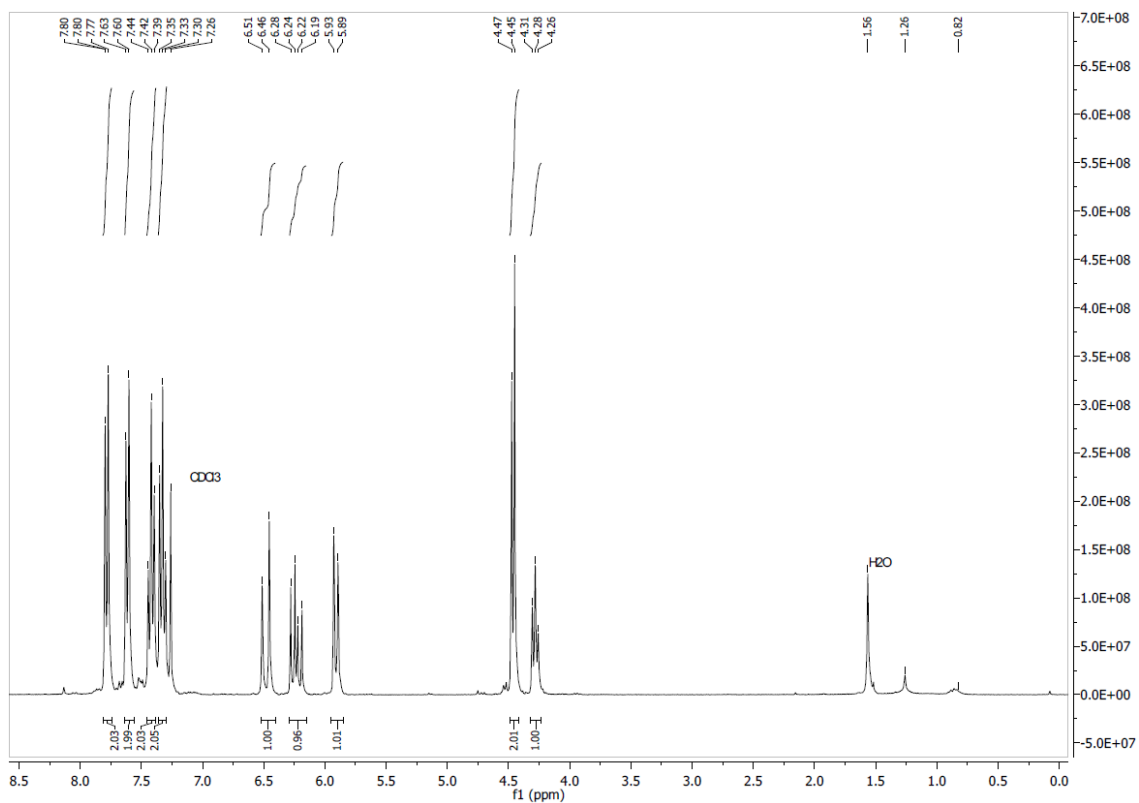

## 5. 1-Decyl acetate (7).

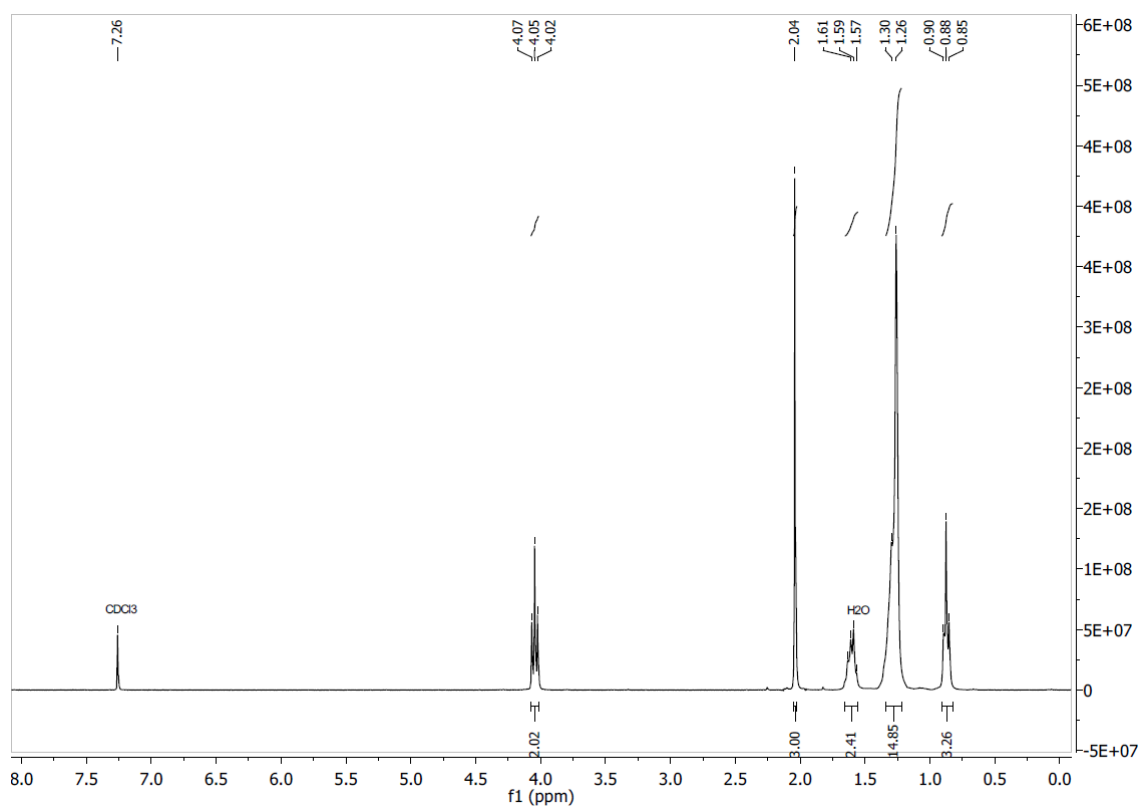

## 6. 1-Decyl phenylacetate (8).

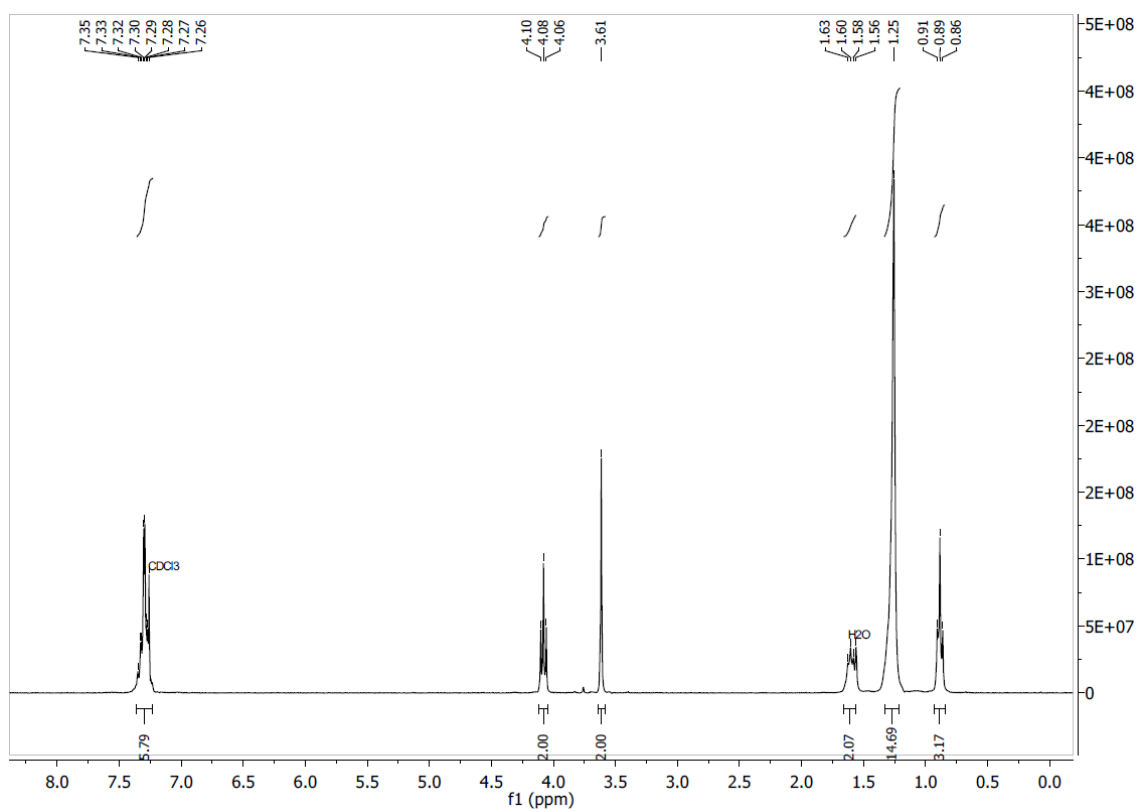

## 7. 1-Decyl benzoate (9).

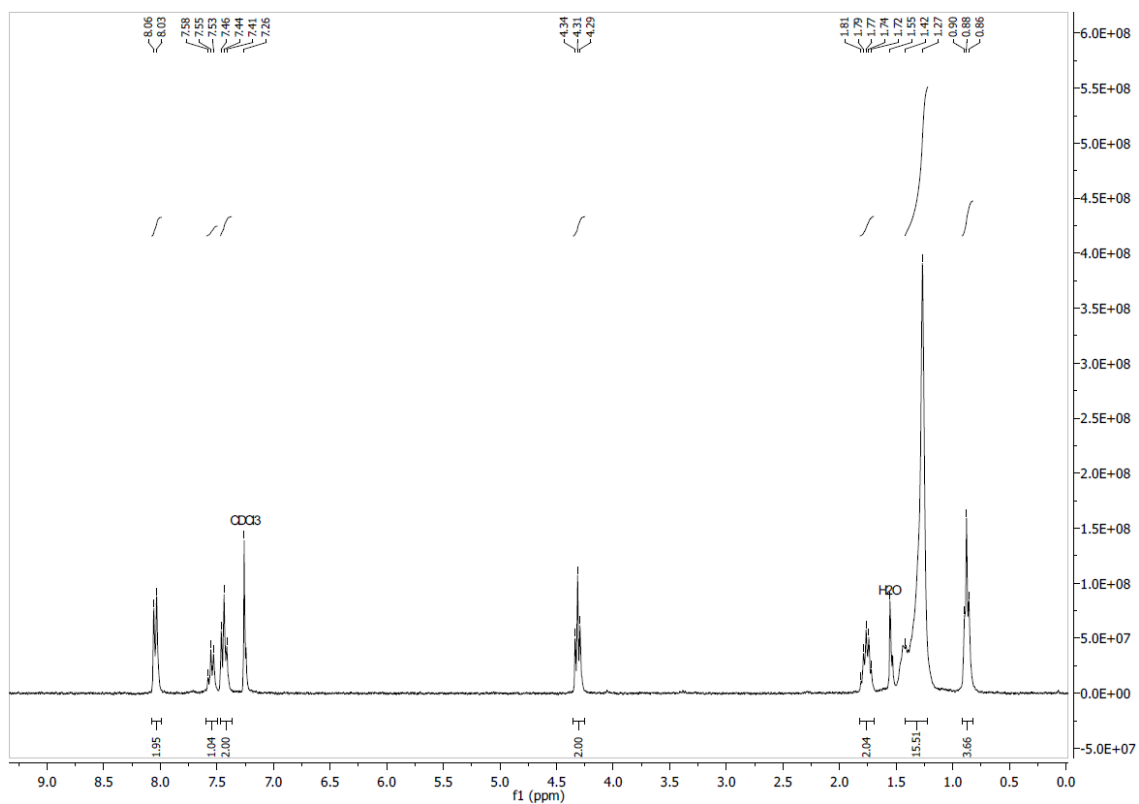

## 8. 1-Decyl acrylate (10).

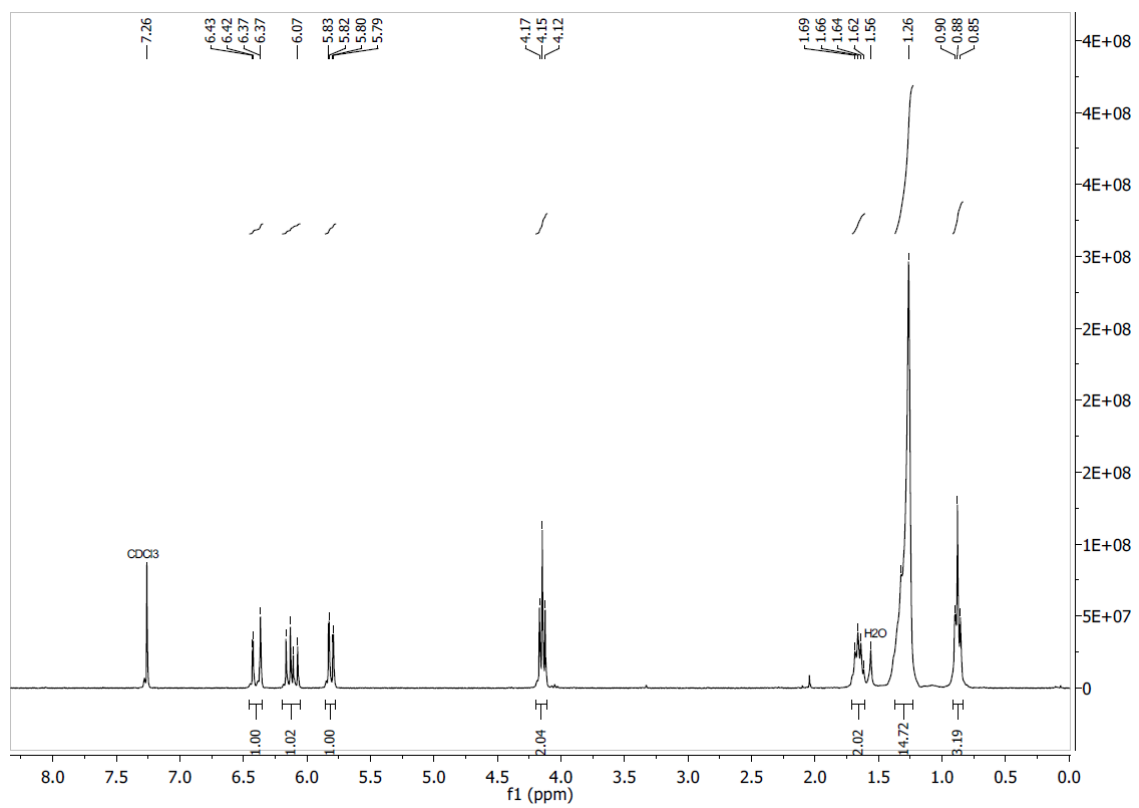

### 9. 6-Chlorohexyl Acetate (12).

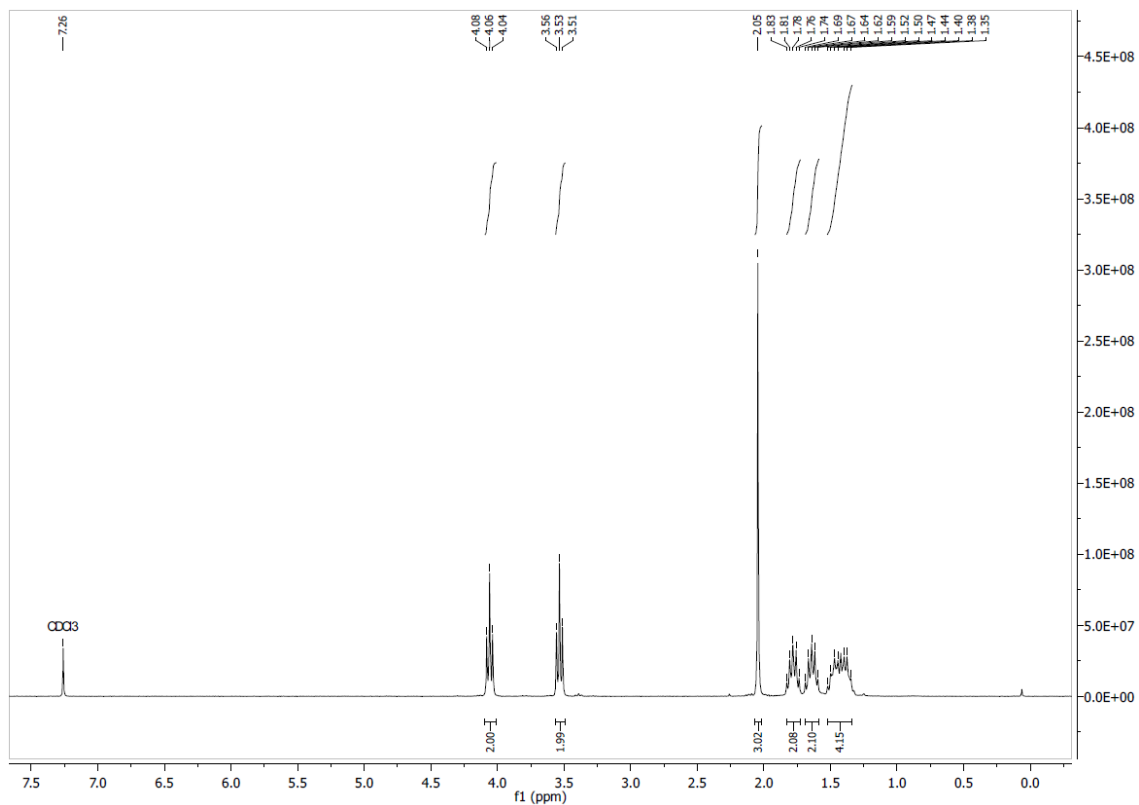

### 10. 6-Chlorohexyl phenylacetate (13).

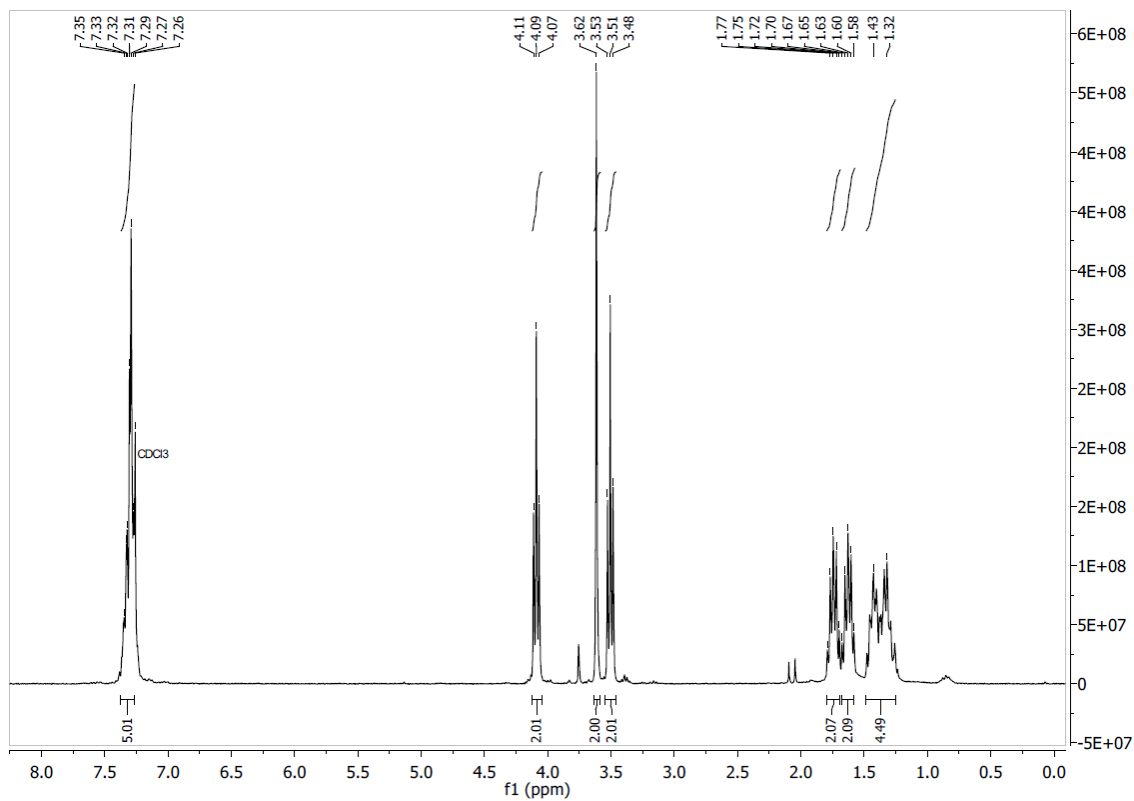

### 11. 6-Chlorohexyl benzoate (14).

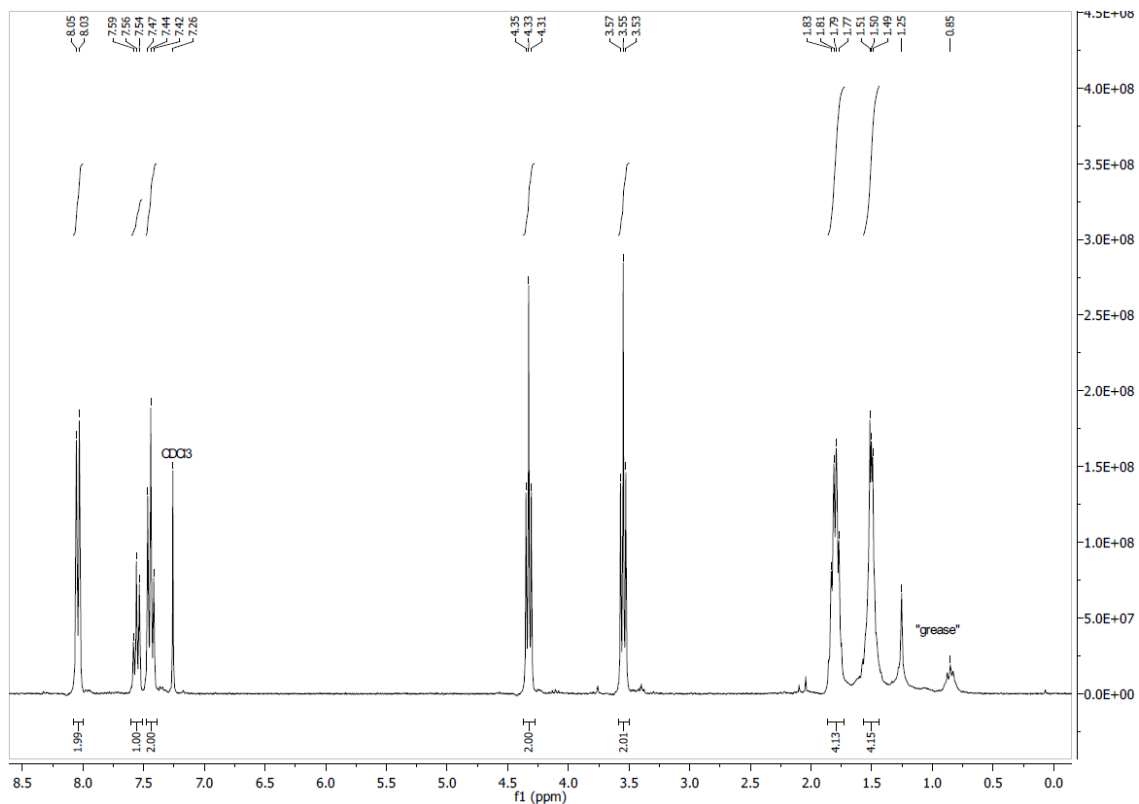

### 12. 6-Chlorohexyl acrylate (15).

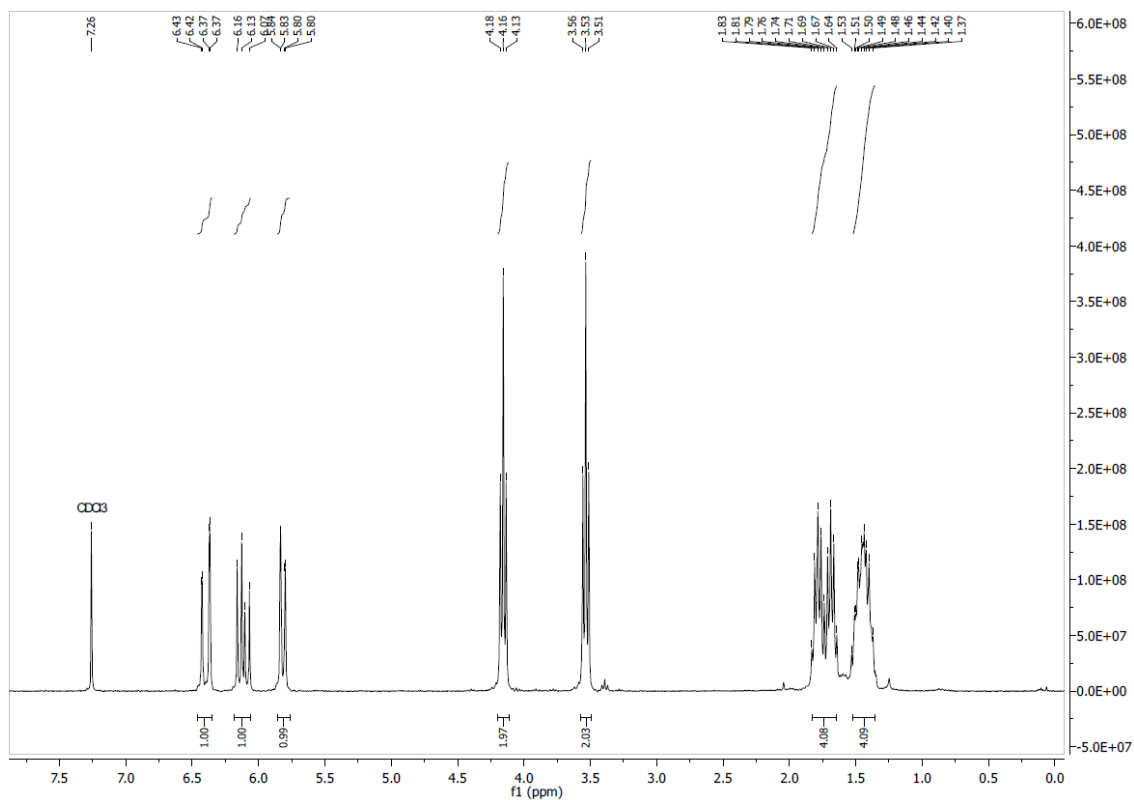

13. 2-(2-Ethoxyethoxy)ethyl acetate (17).

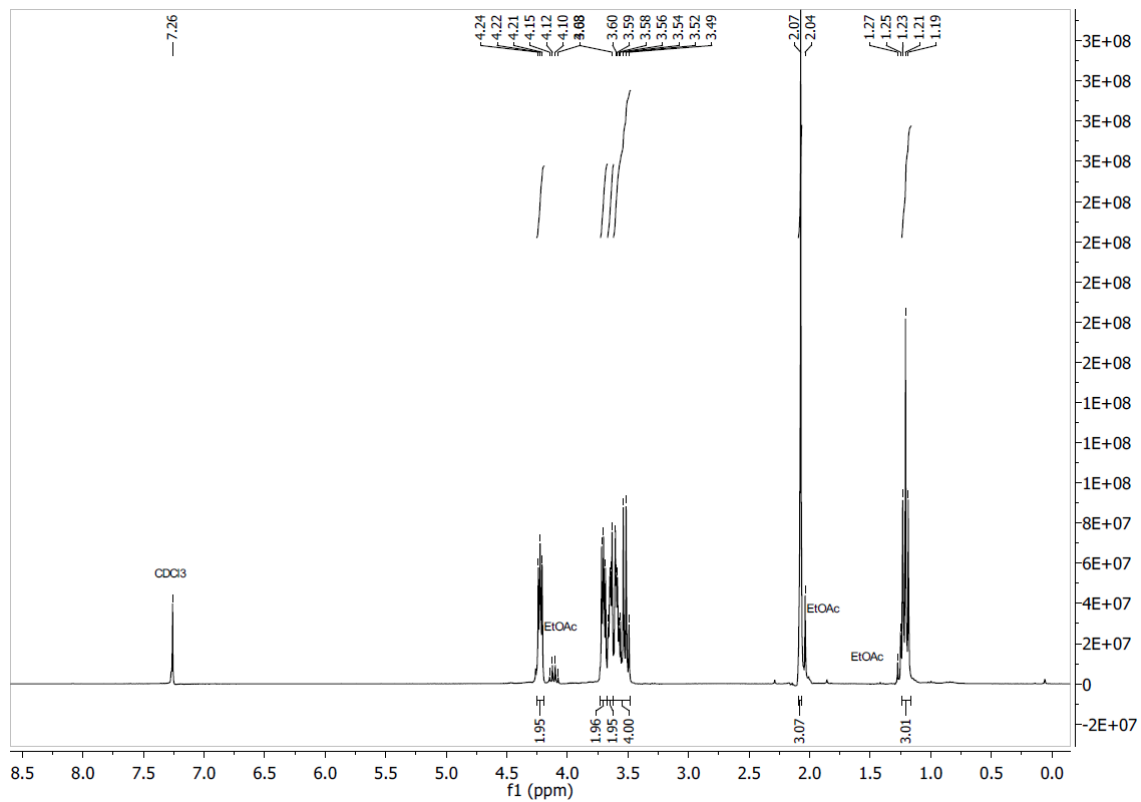

14. 2-(2-Ethoxyethoxy)ethyl phenylacetate (18).

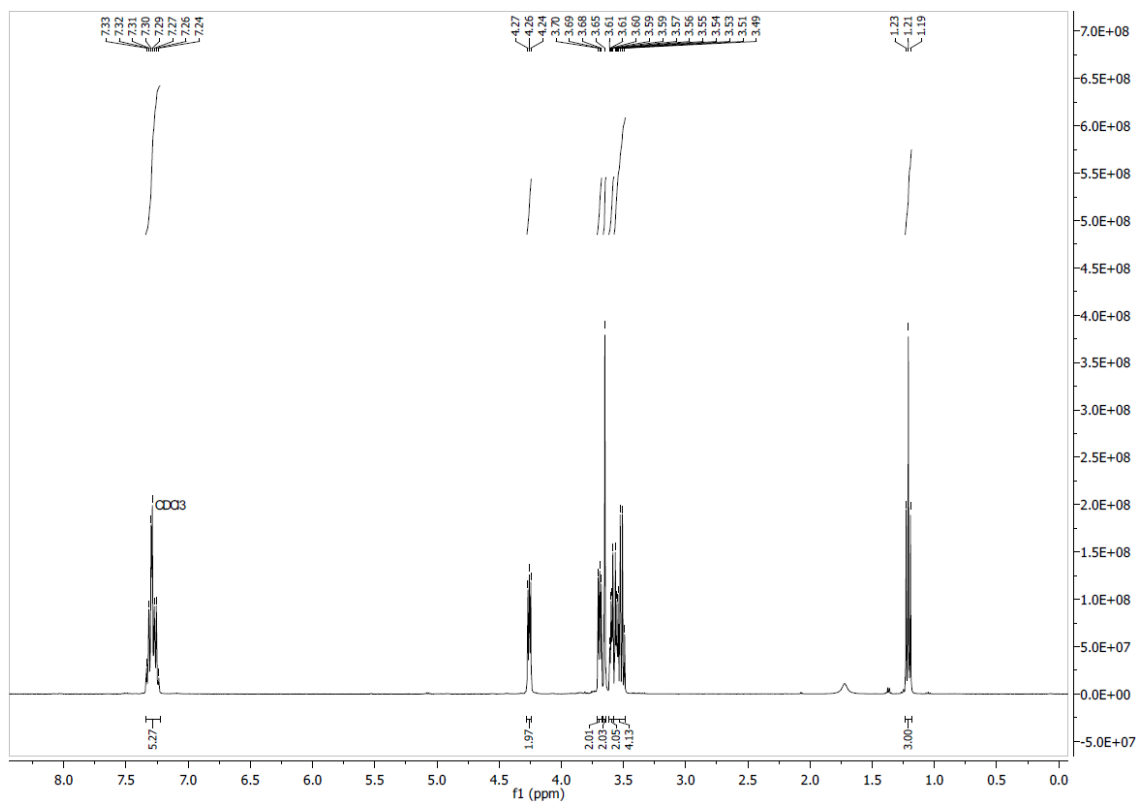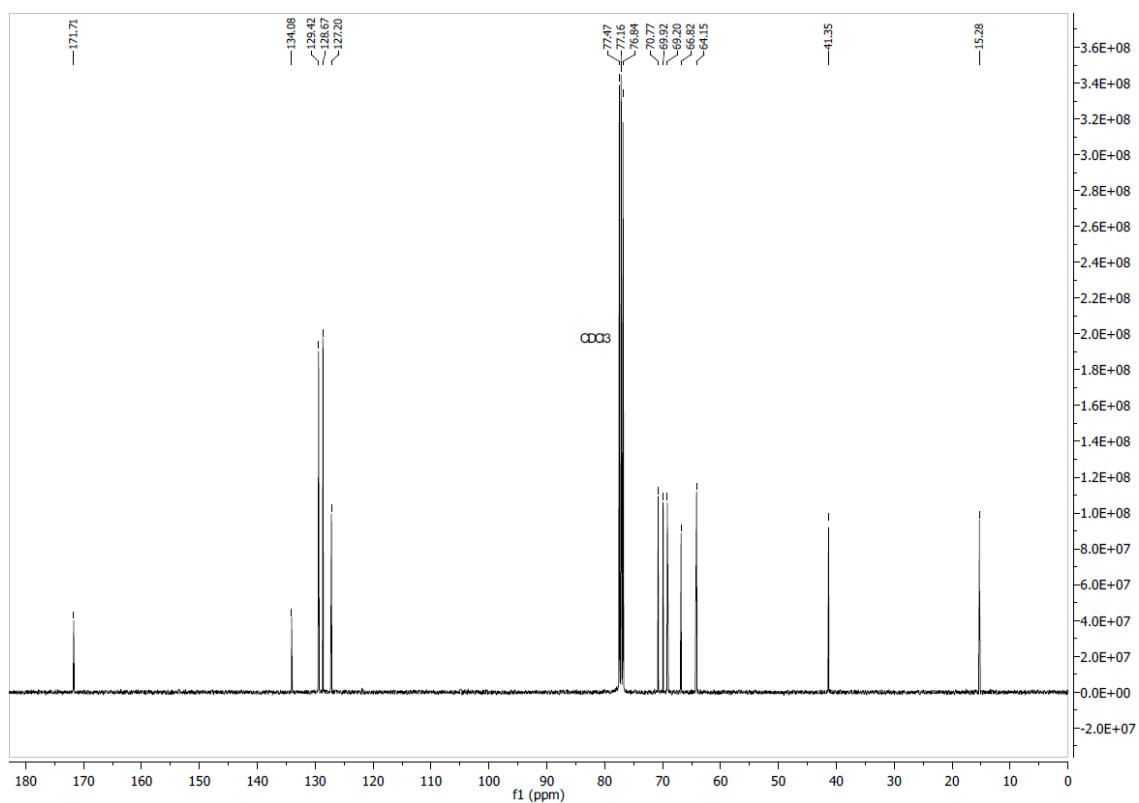



15. 2-(2-Ethoxyethoxy)ethyl benzoate (19).

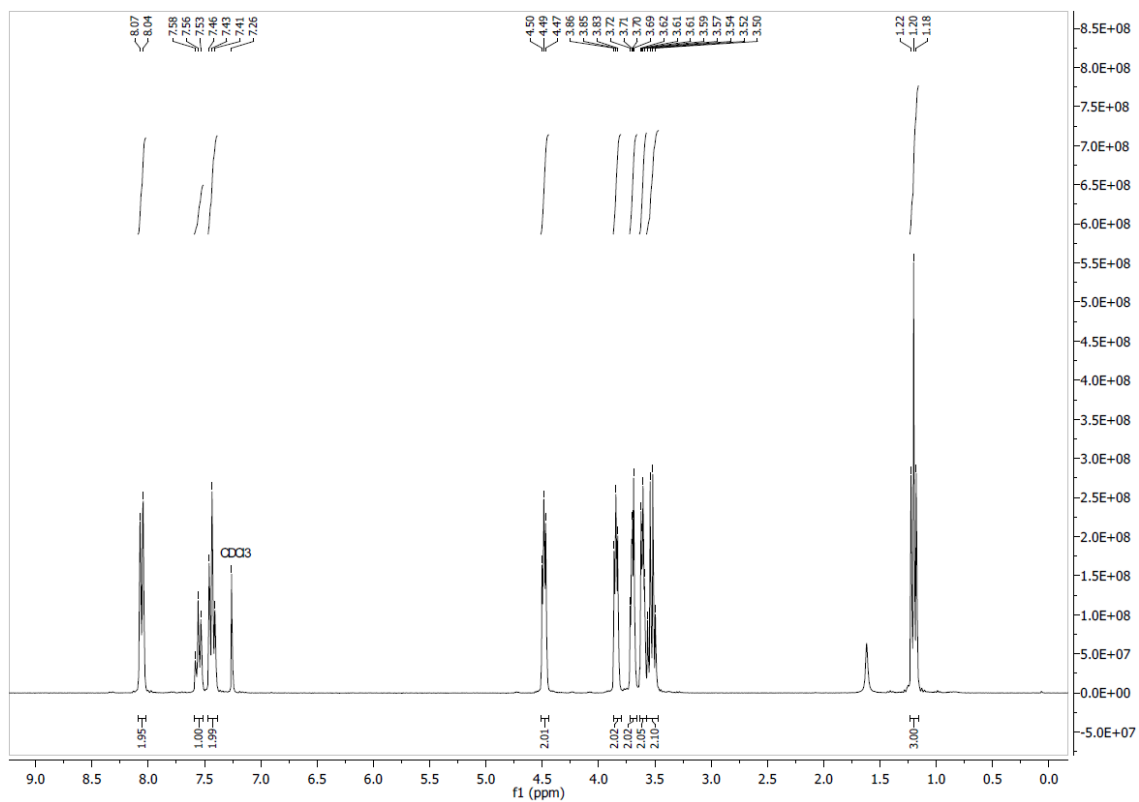

16. 2-(2-Ethoxyethoxy)ethyl acrylate (20).

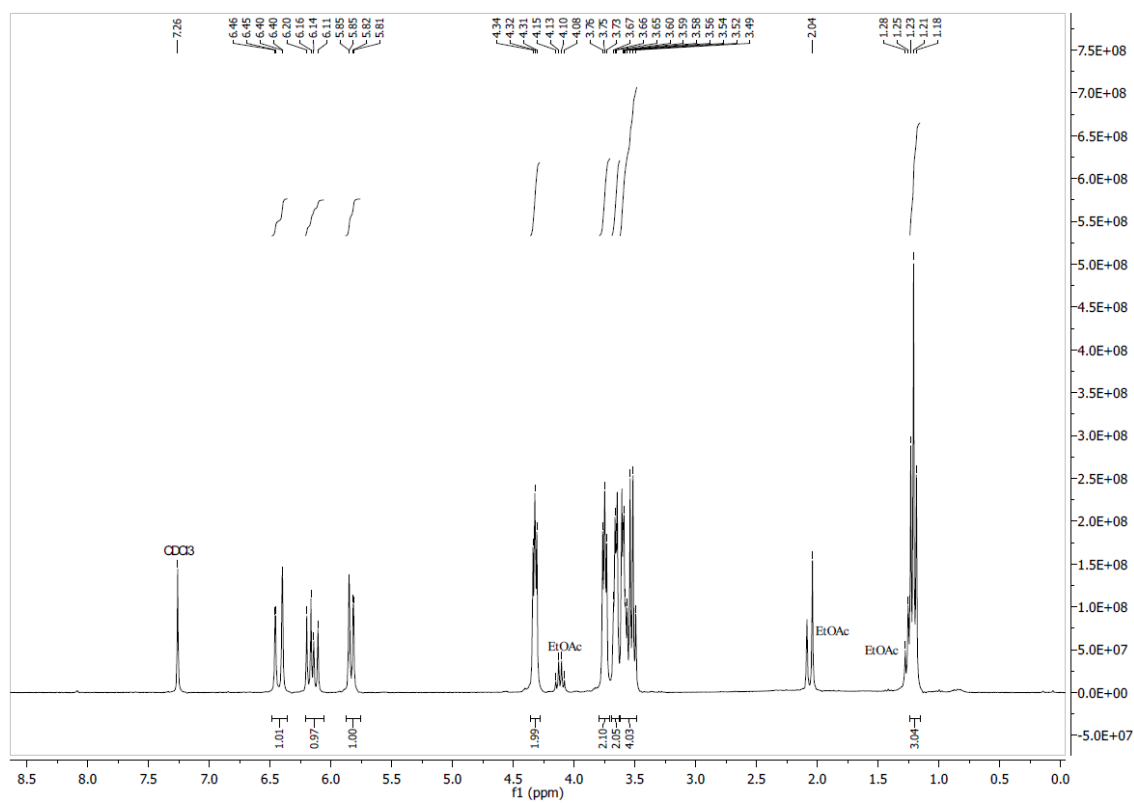

17. 4-Nitrobenzyl acetate (22).

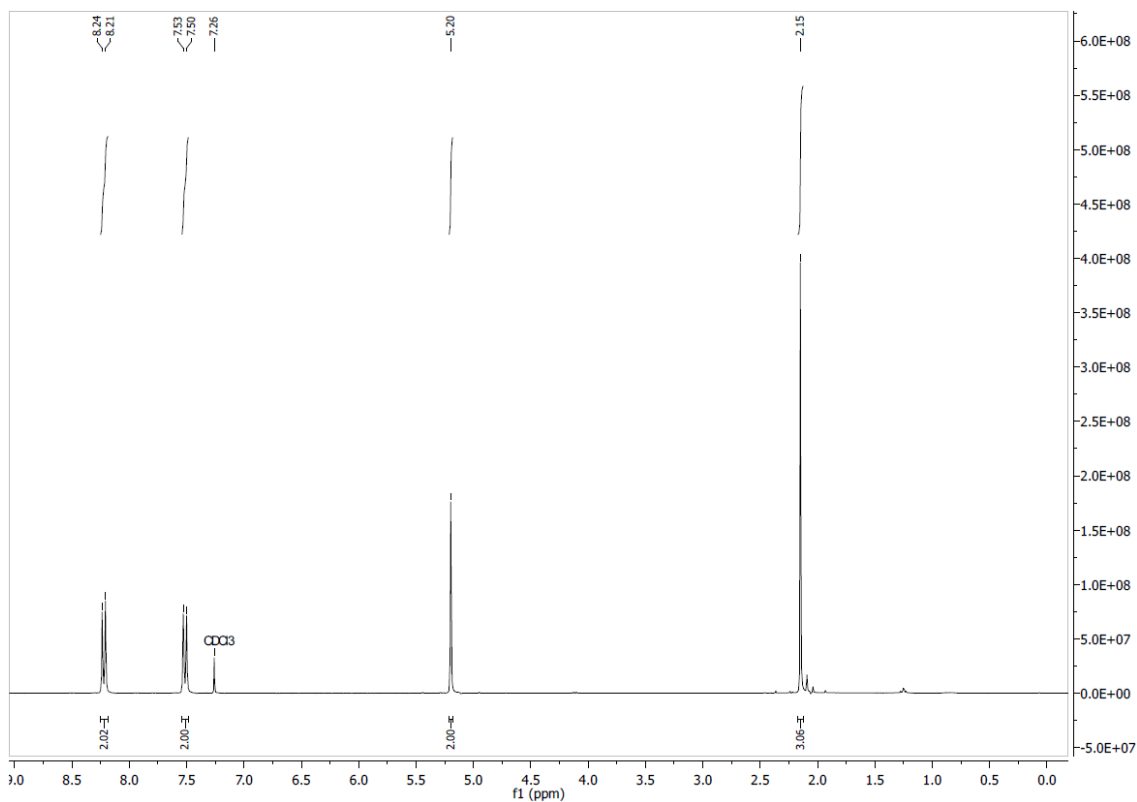

18. 4-Nitrobenzyl phenylacetate (23).

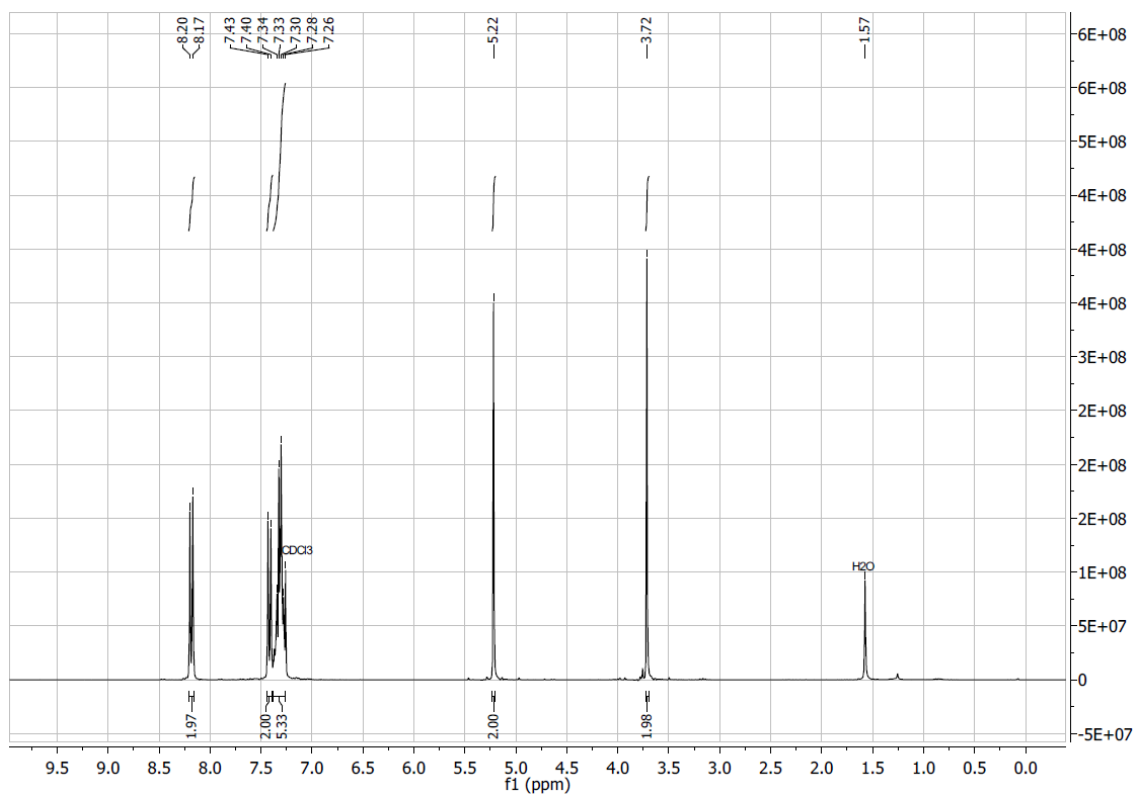

### 19. 4-Nitrobenzyl benzoate (24).

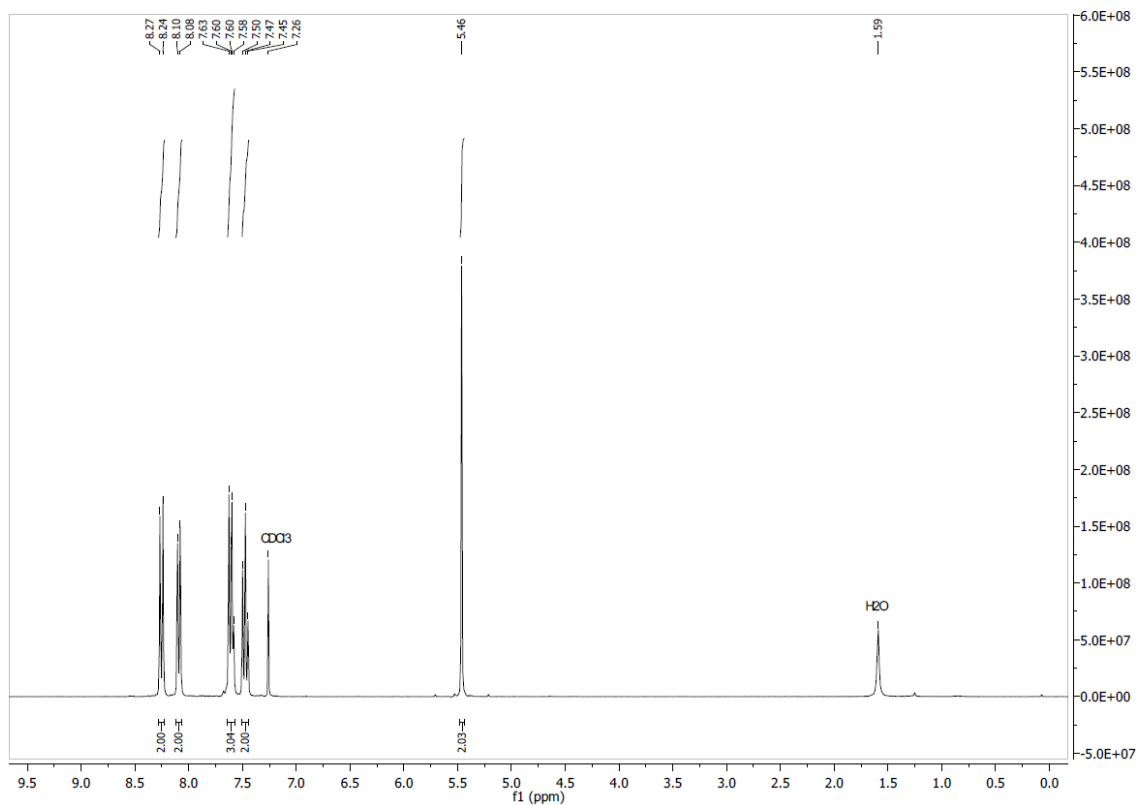

### 20. 4-Nitrobenzyl acrylate (25).

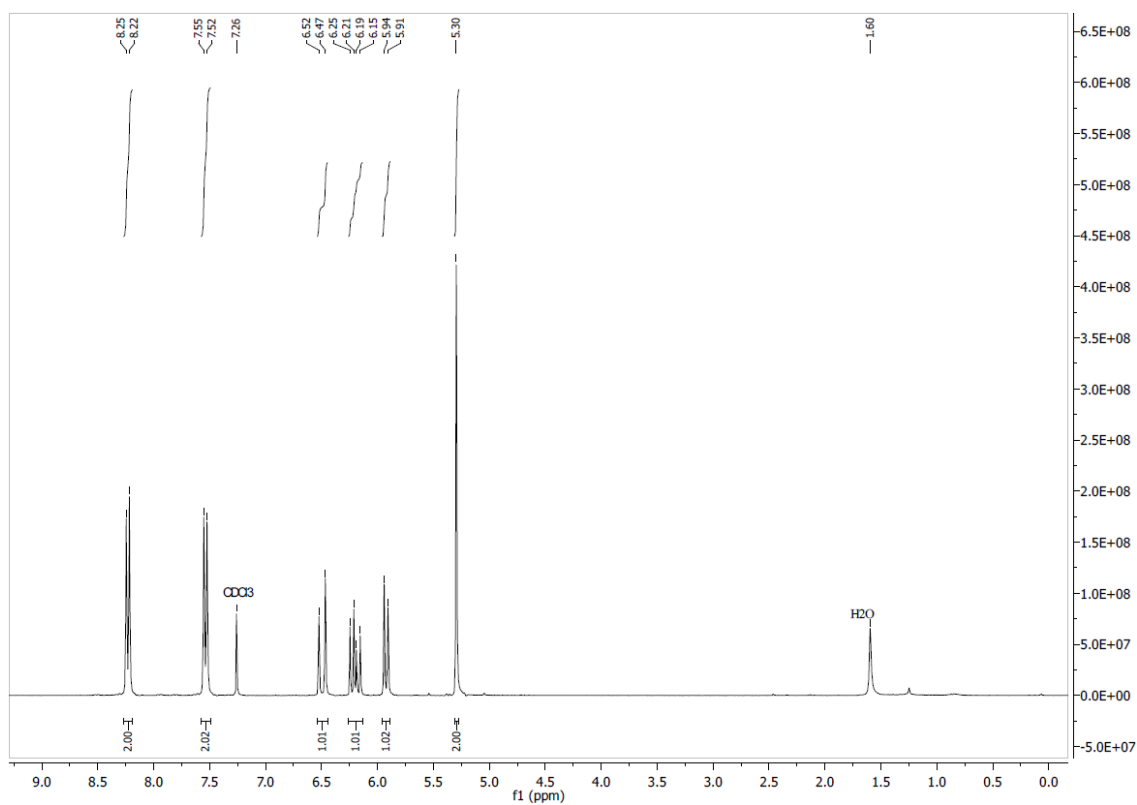

## 21. 4-(Acetoxymethyl)benzoic acid (27).

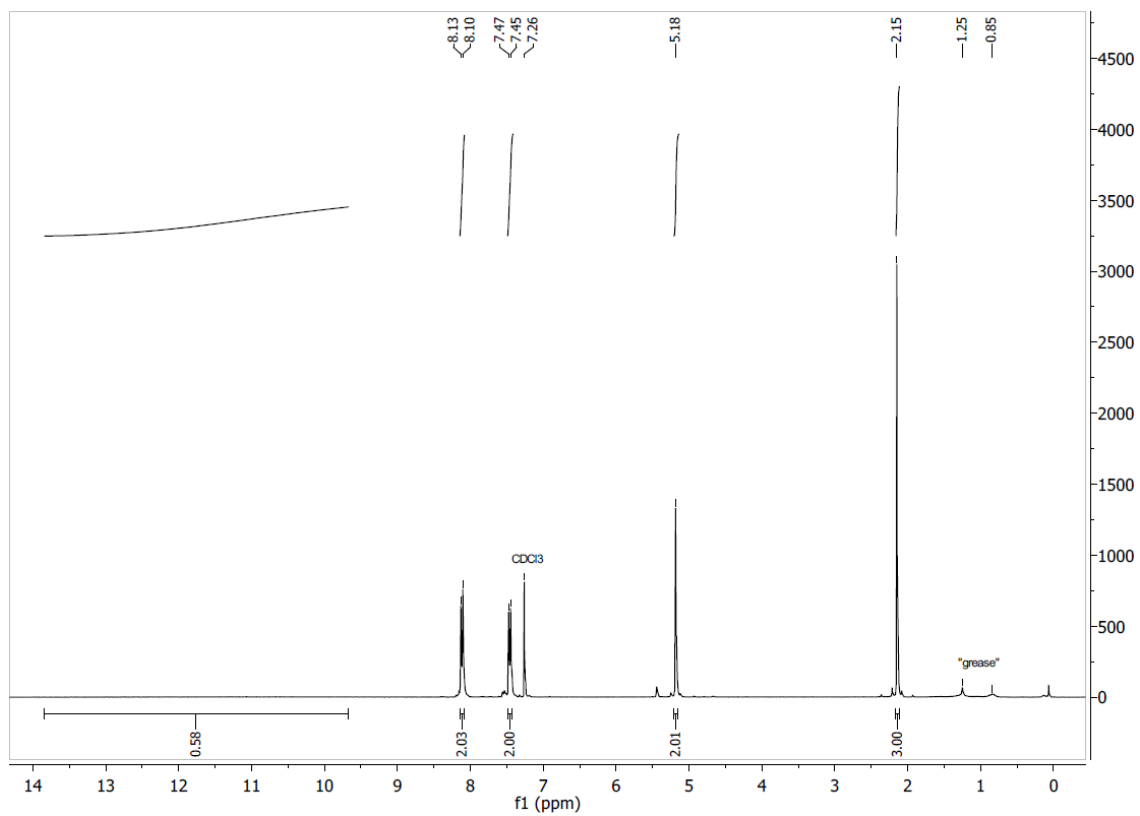

## 22. 4-[(Phenylacetoxy)methyl]benzoic acid (28).

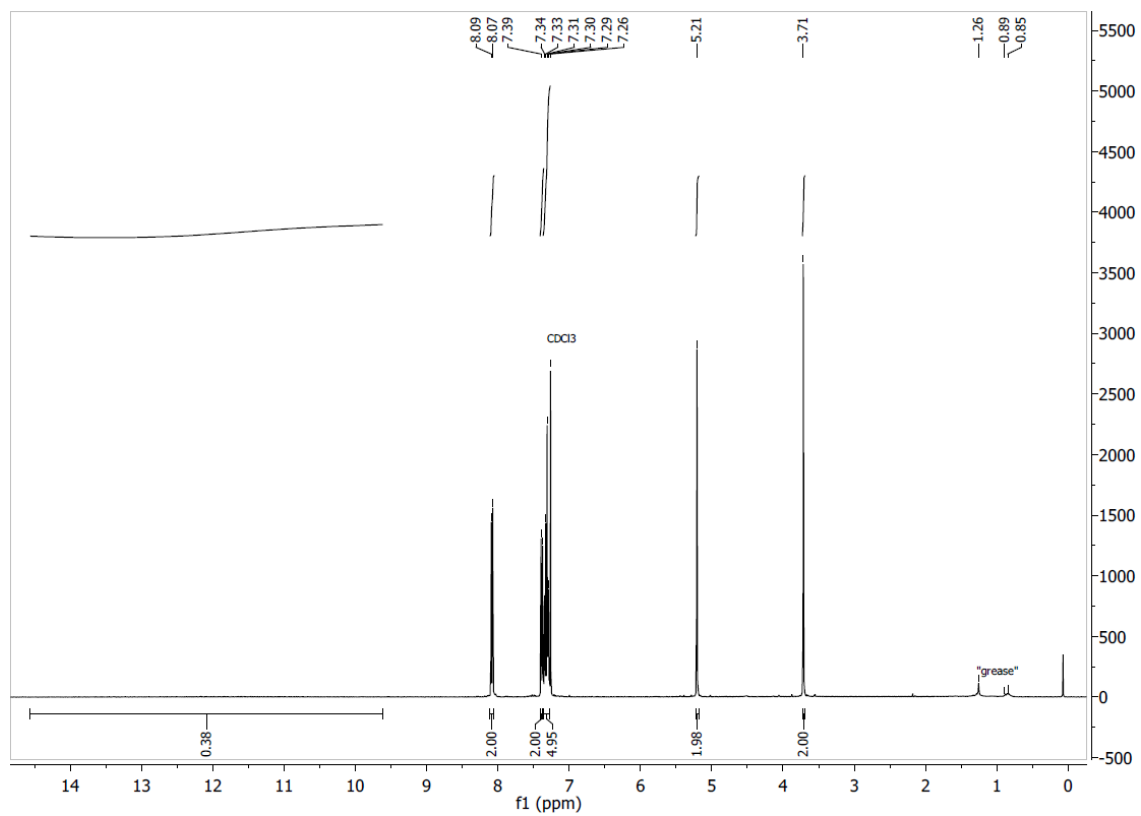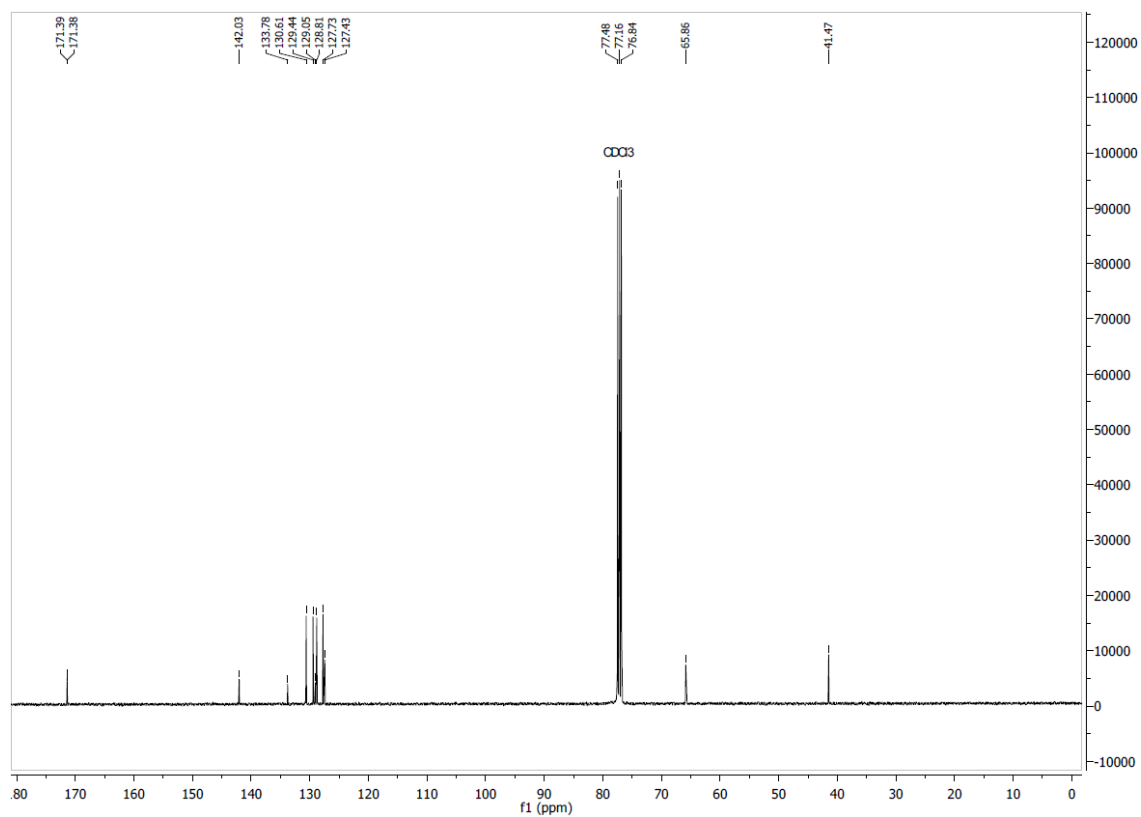

### 23. 4-(Benzoyloxymethyl)benzoic acid (29).

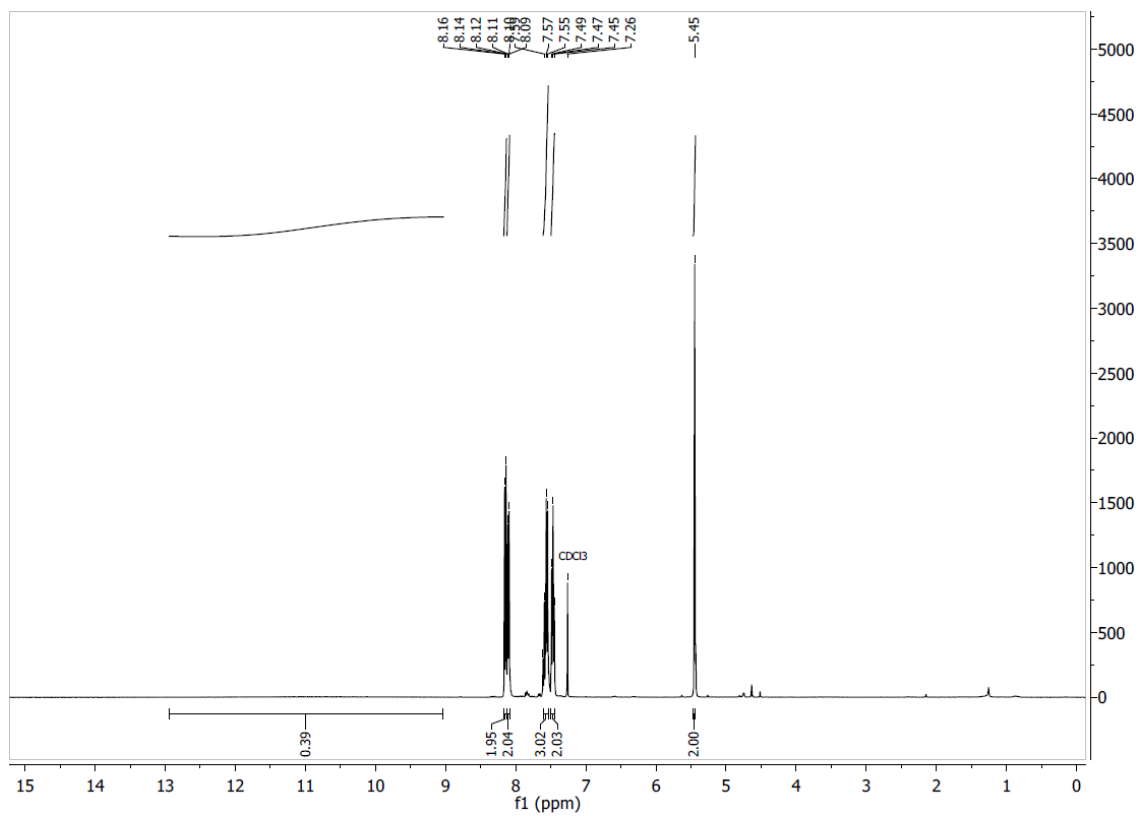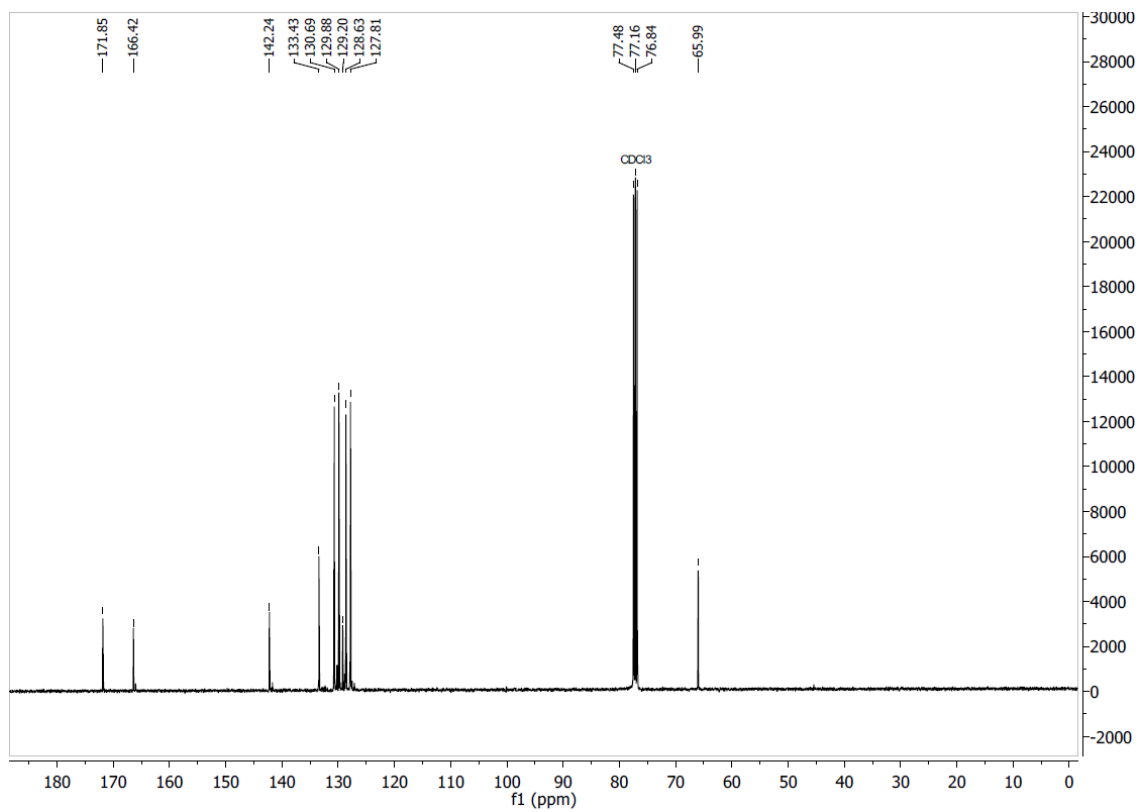

## 24. 4-(Acryloyloxymethyl)benzoic acid (30).

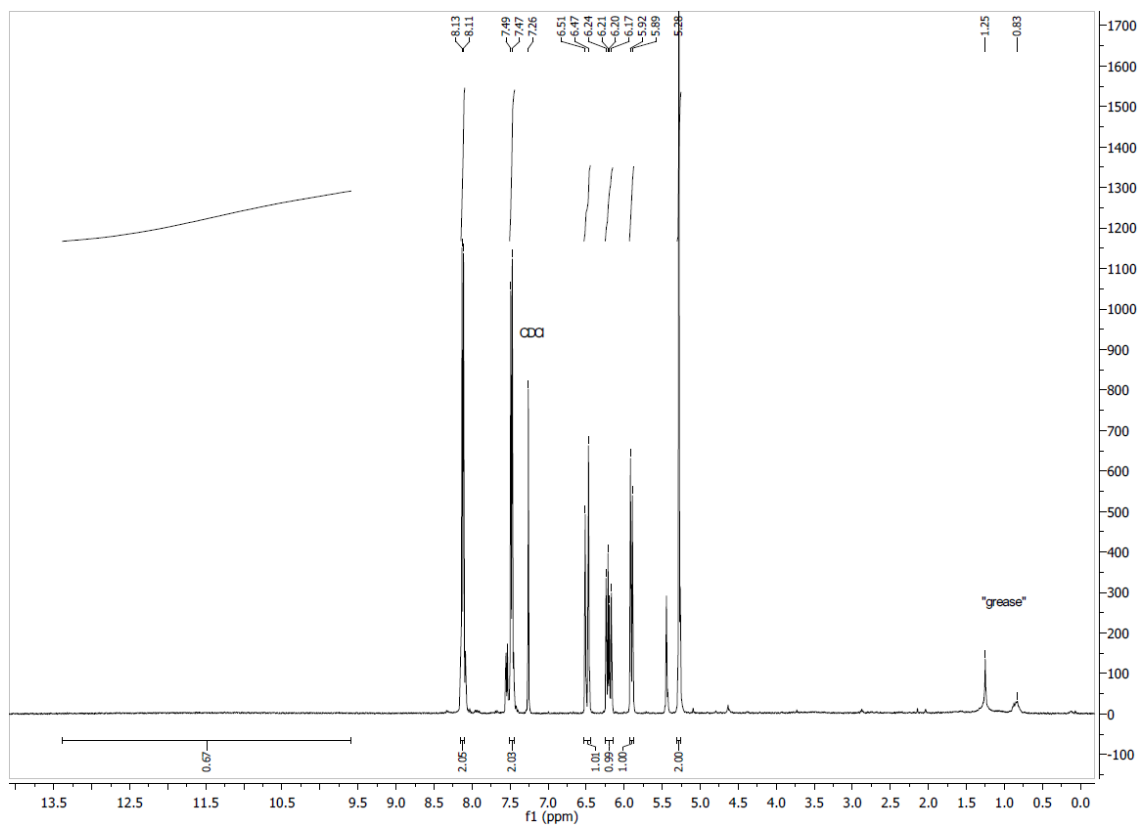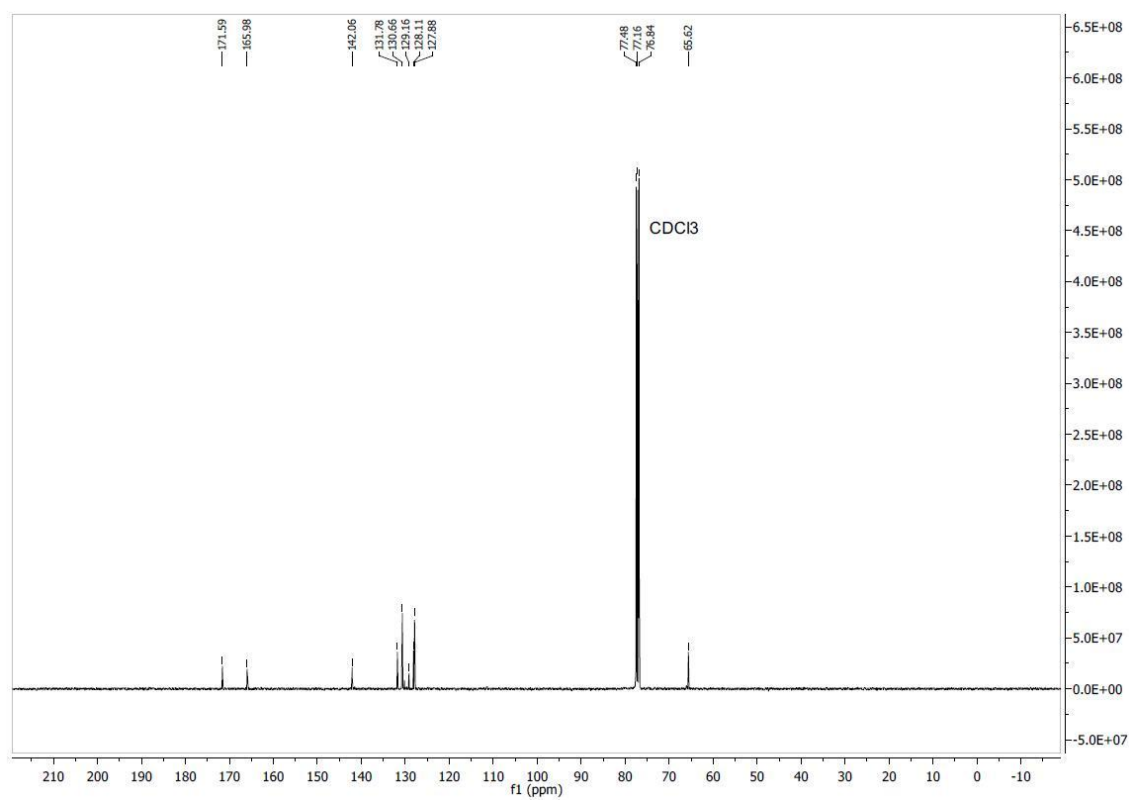

## 25. Hexane-1,6-diyl diacetate (32).

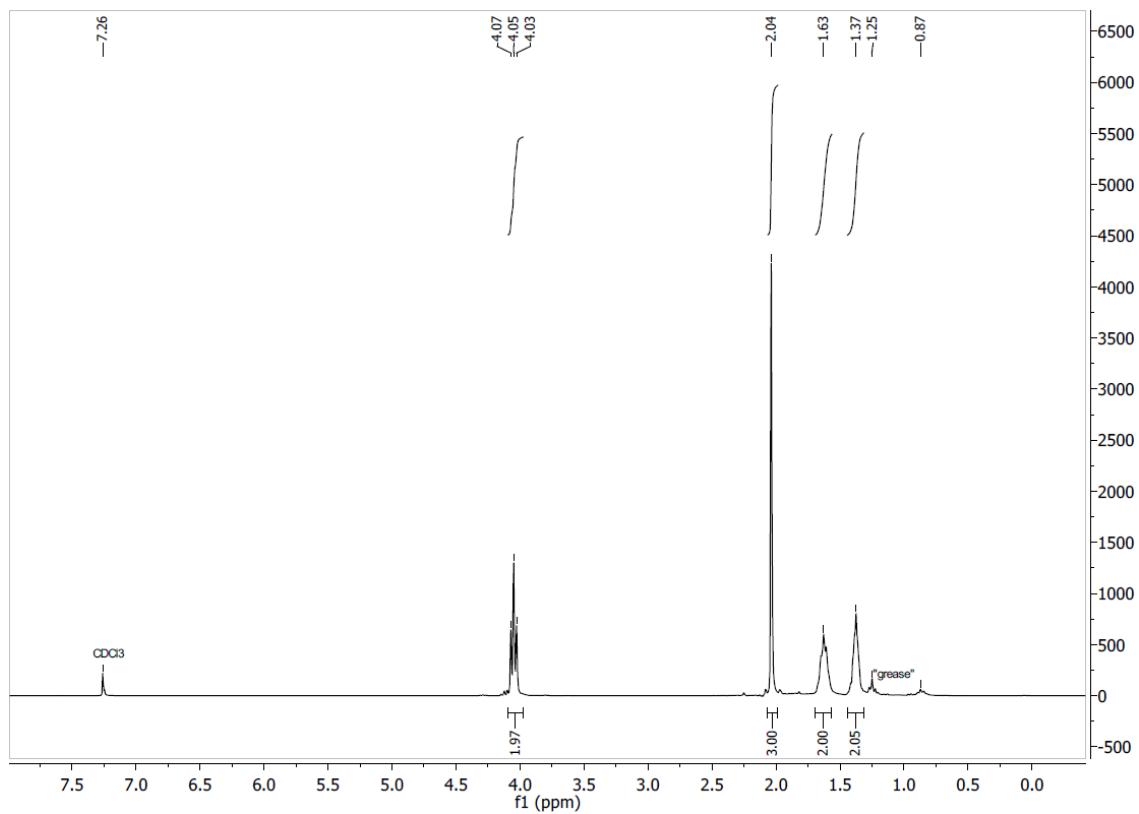

## 26. 6-Hydroxyhexyl acetate (33).

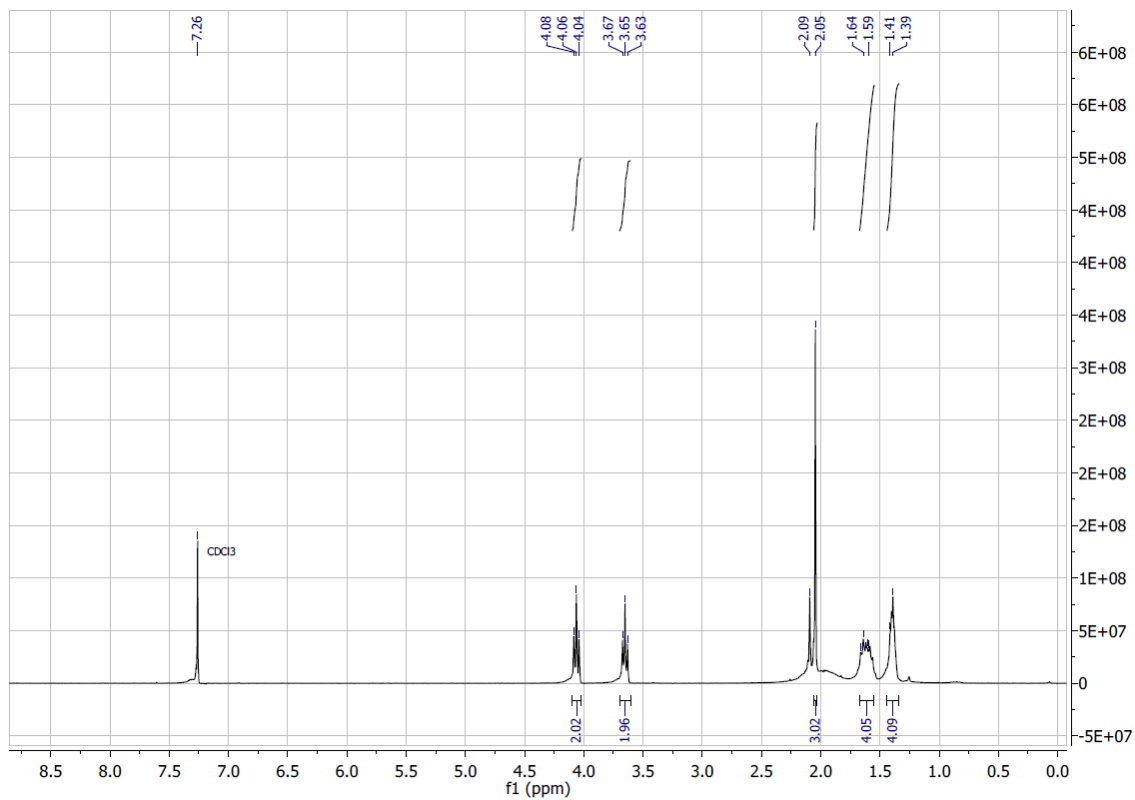



## 27. Hexane-1,6-diyl bis(phenylacetate) (34).

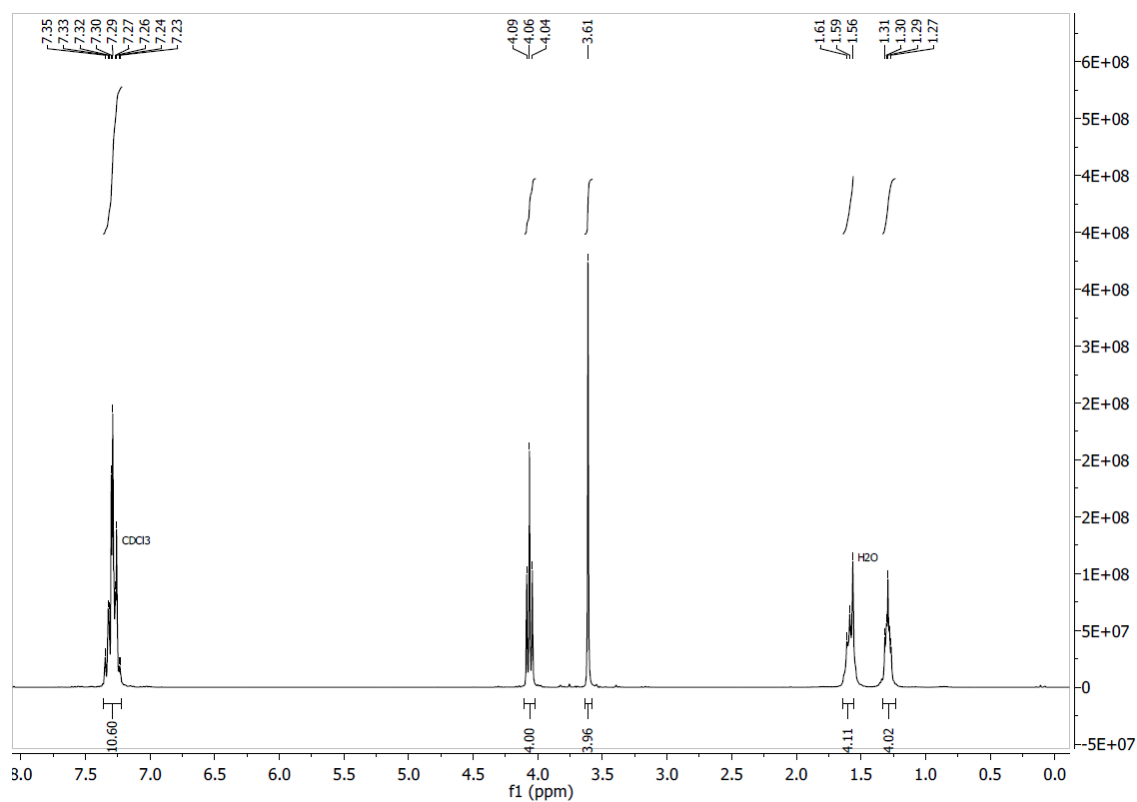

## 28. 6-Hydroxyhexyl phenylacetate (35).

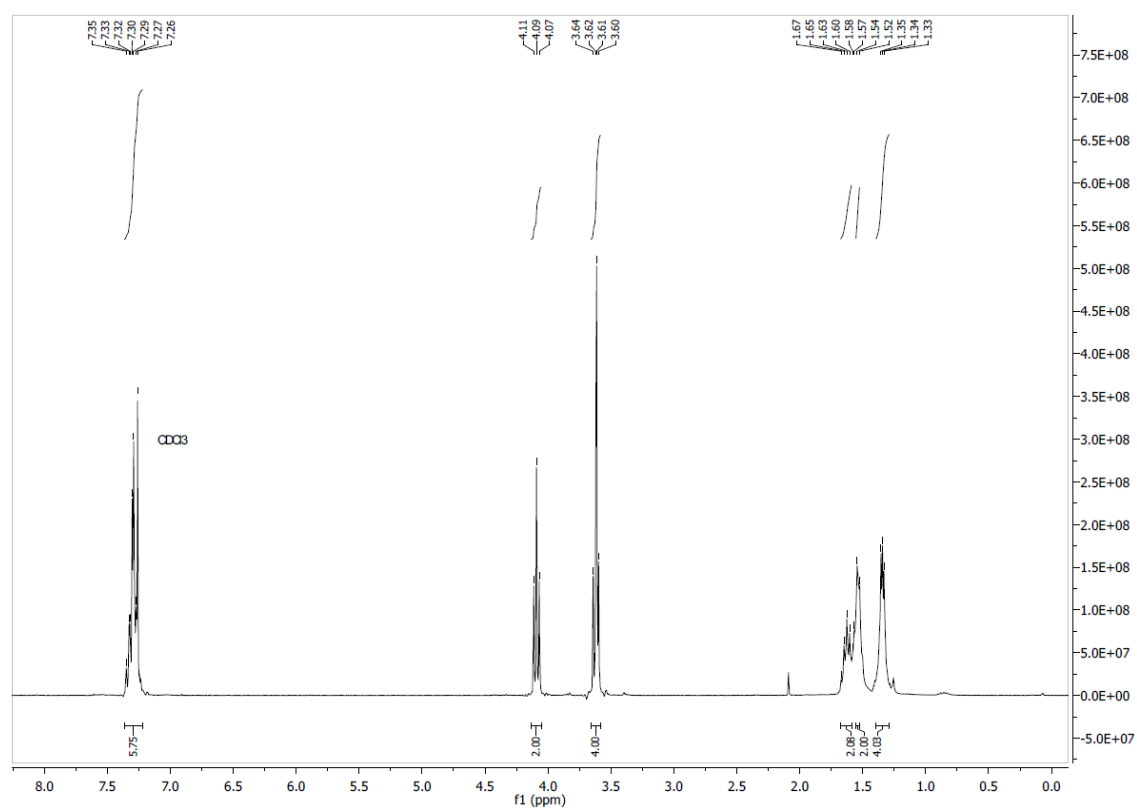

## 29. Ethyl 6-acetoxyhexanoate (37).

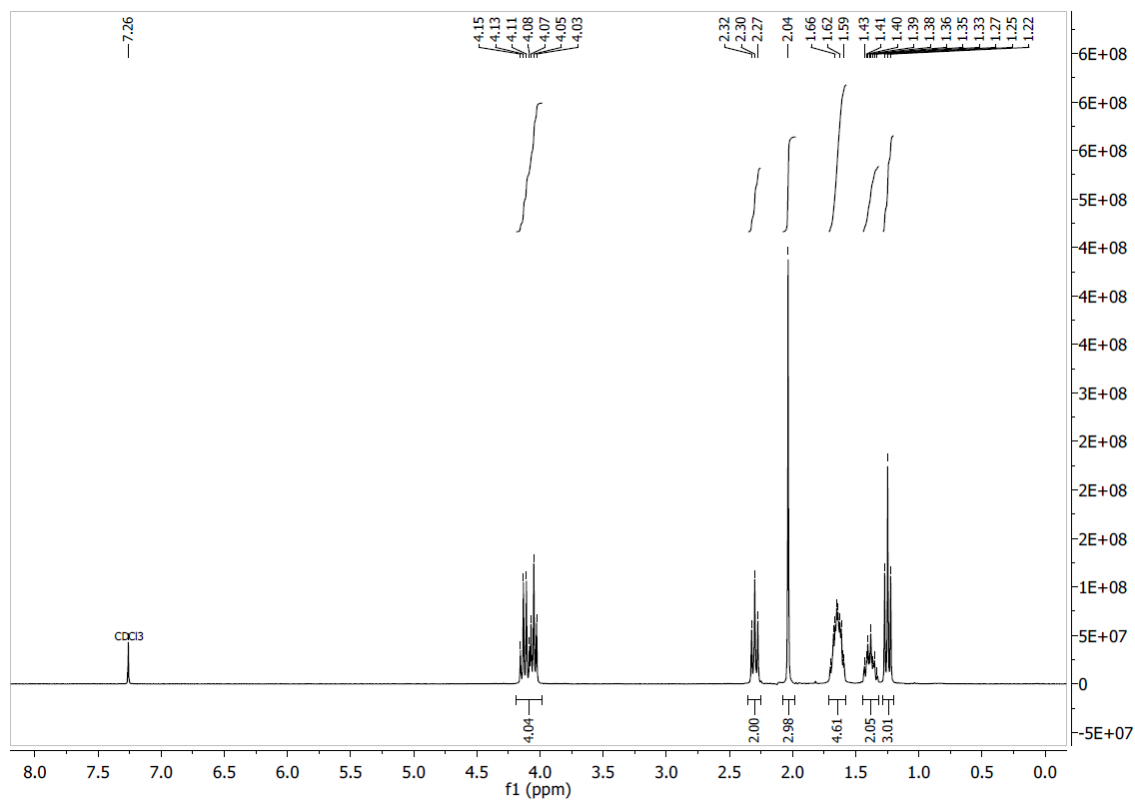

30. Ethyl 6-(phenylacetoxy)hexanoate (38).

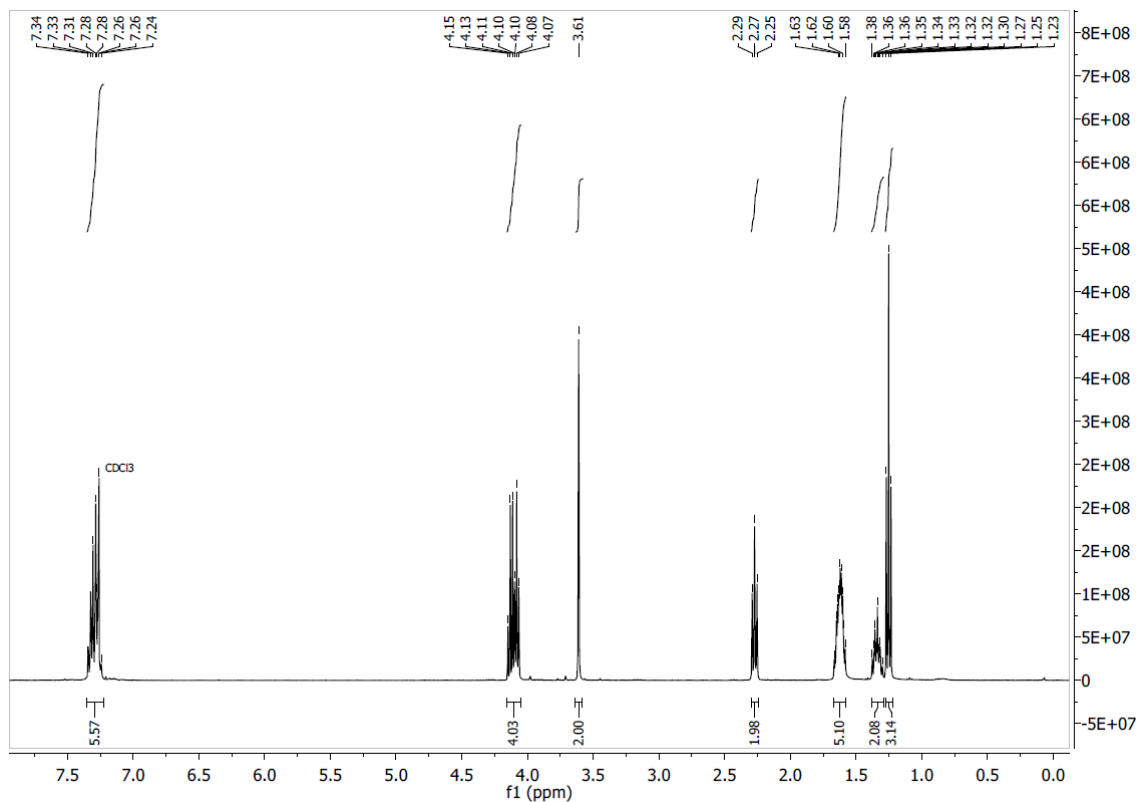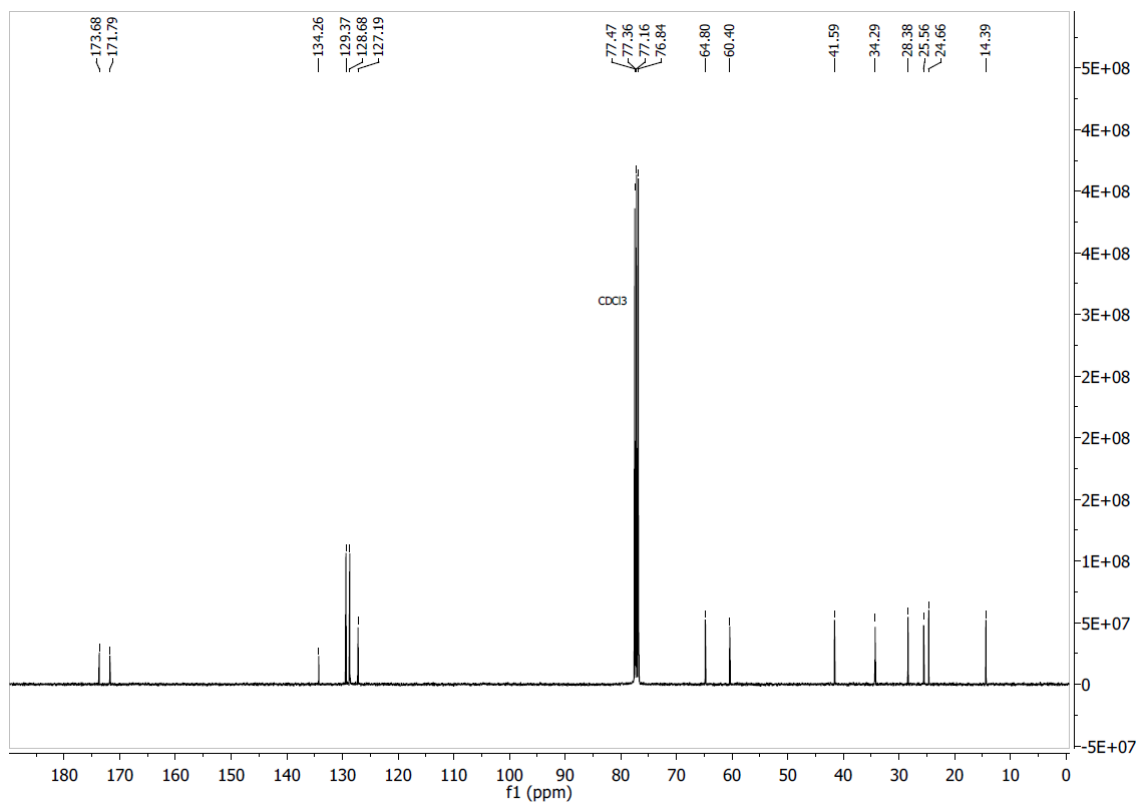



### 32. Ethyl 6-(acryloyloxy)hexanoate (40).

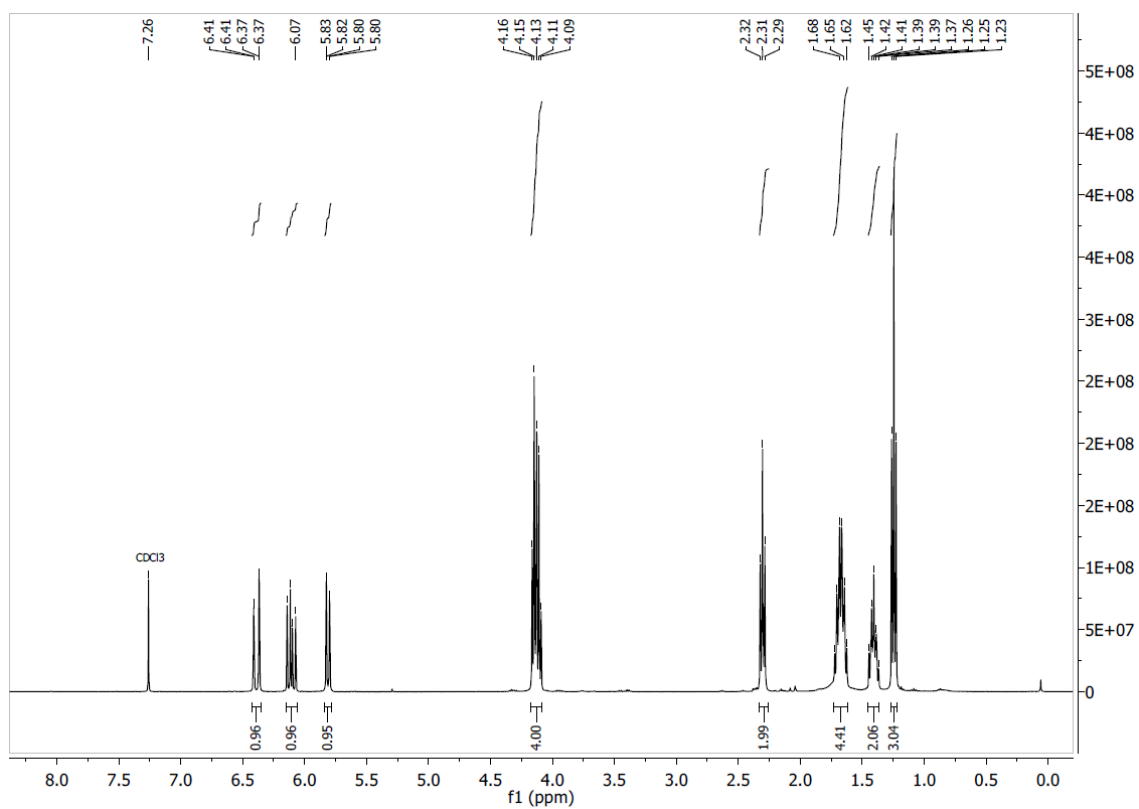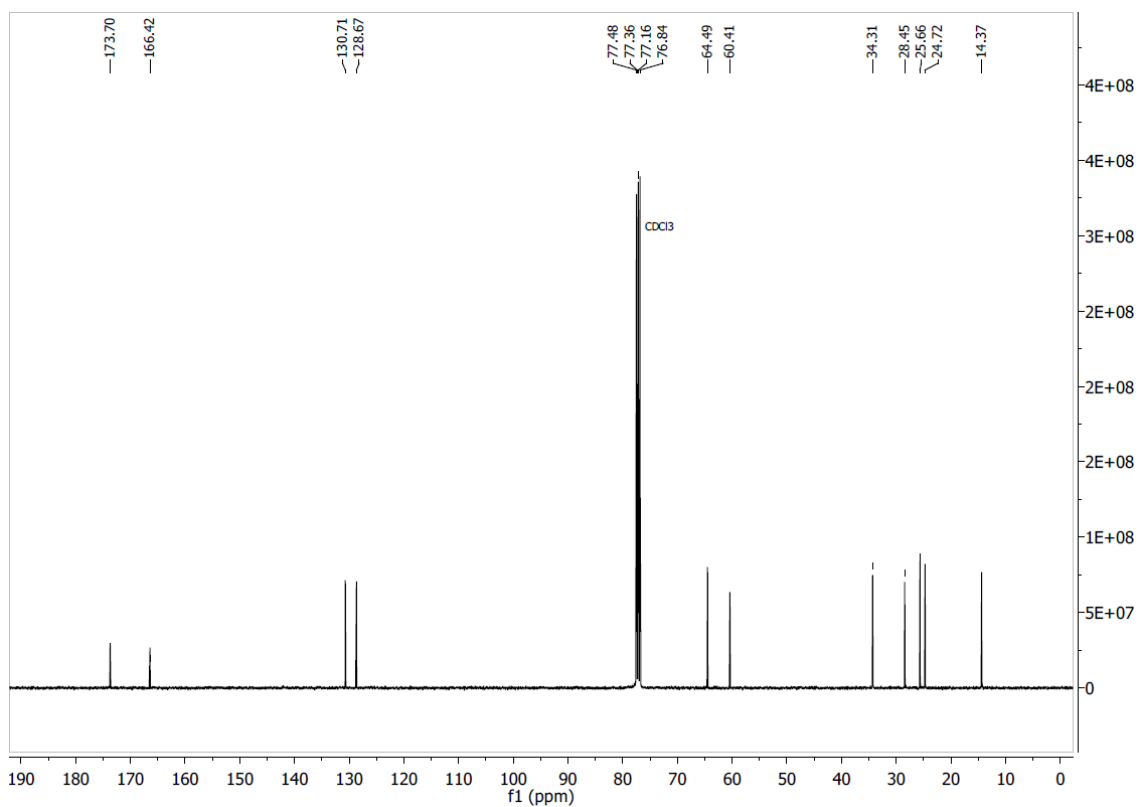

### 33. 4-(Benzyloxycarbonylamino)butyl acetate (42).

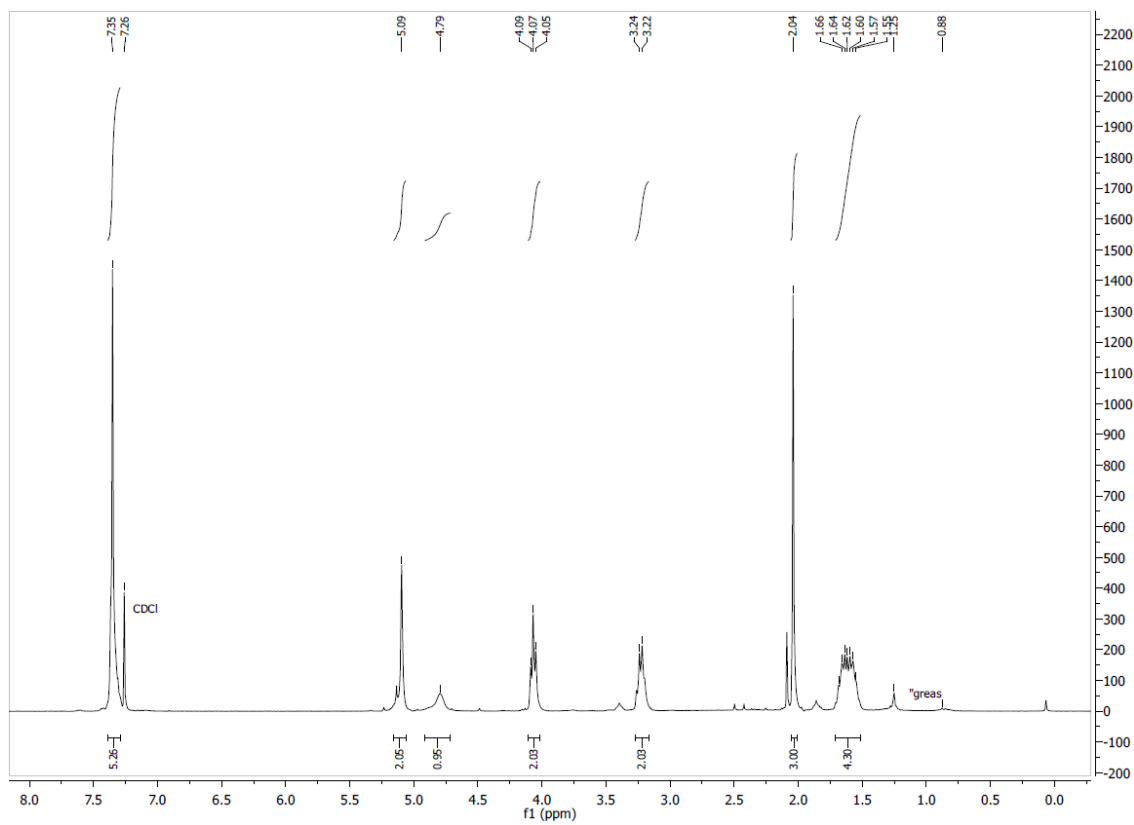

34. 4-(Benzyloxycarbonylamino)butyl phenylacetate (43).

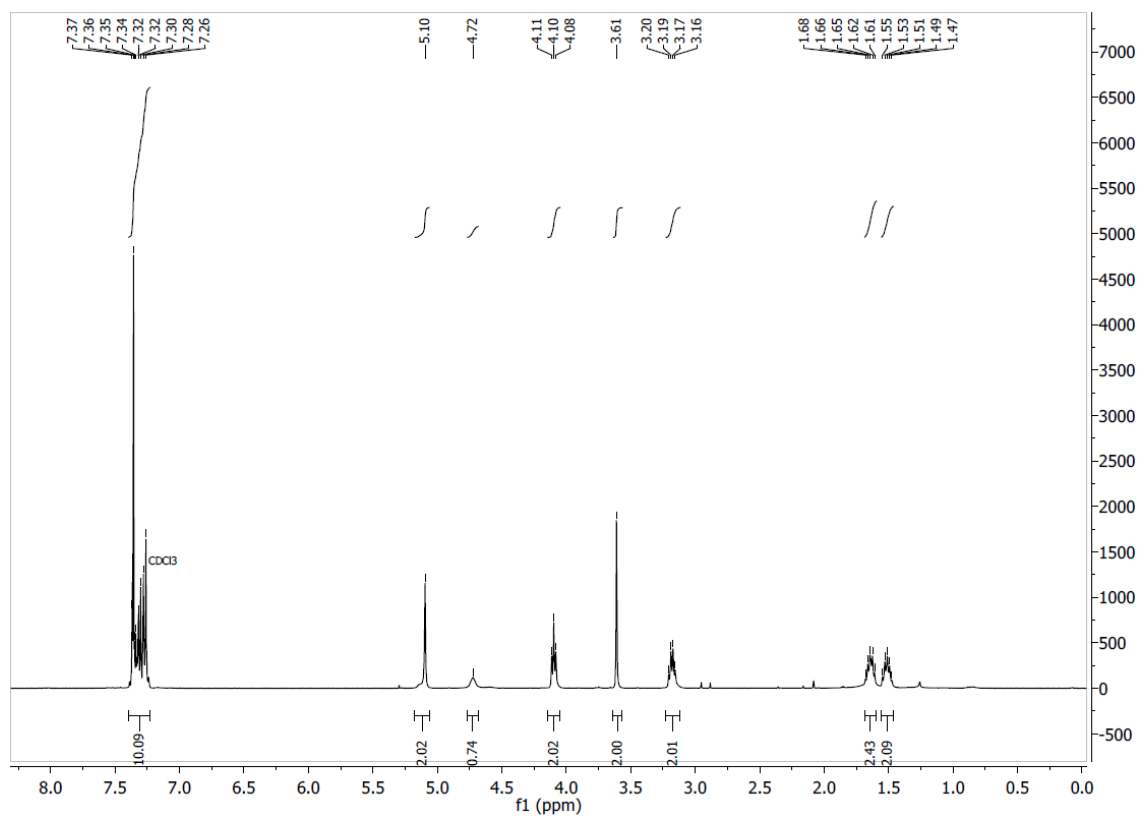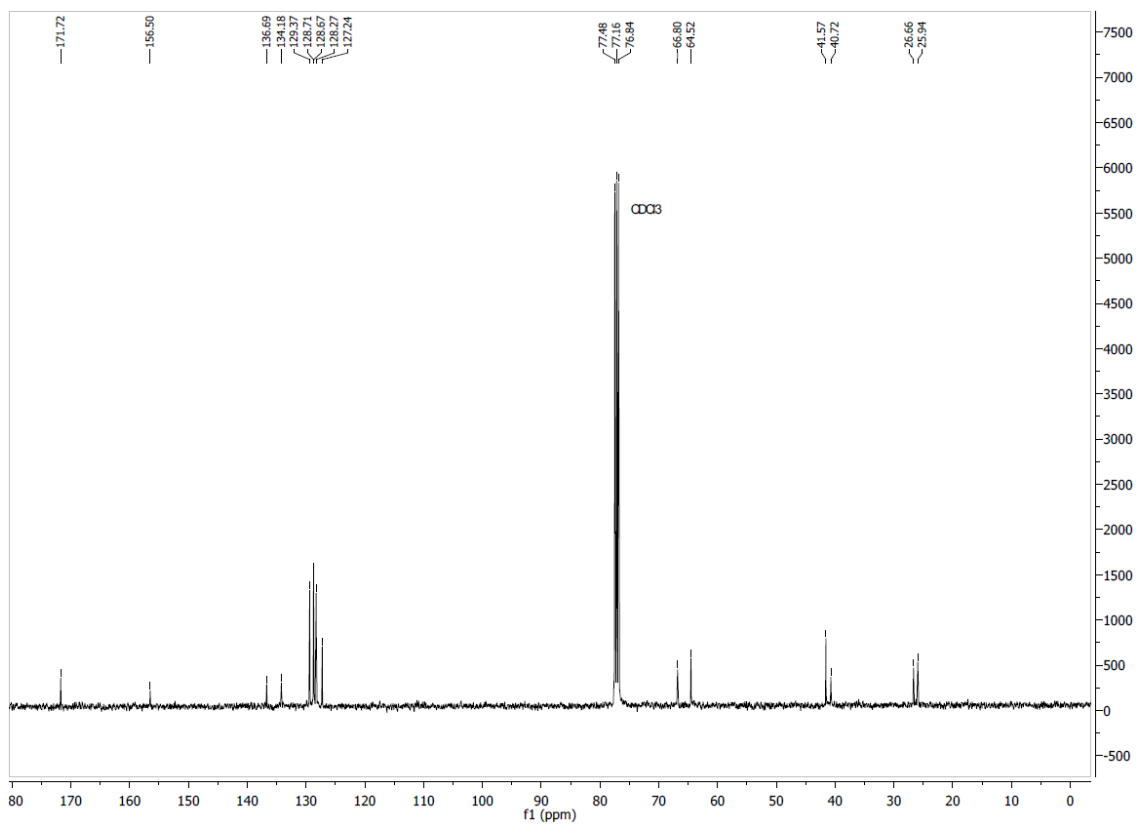

35. 4-(Benzyloxycarbonylamino)butyl acrylate (44).

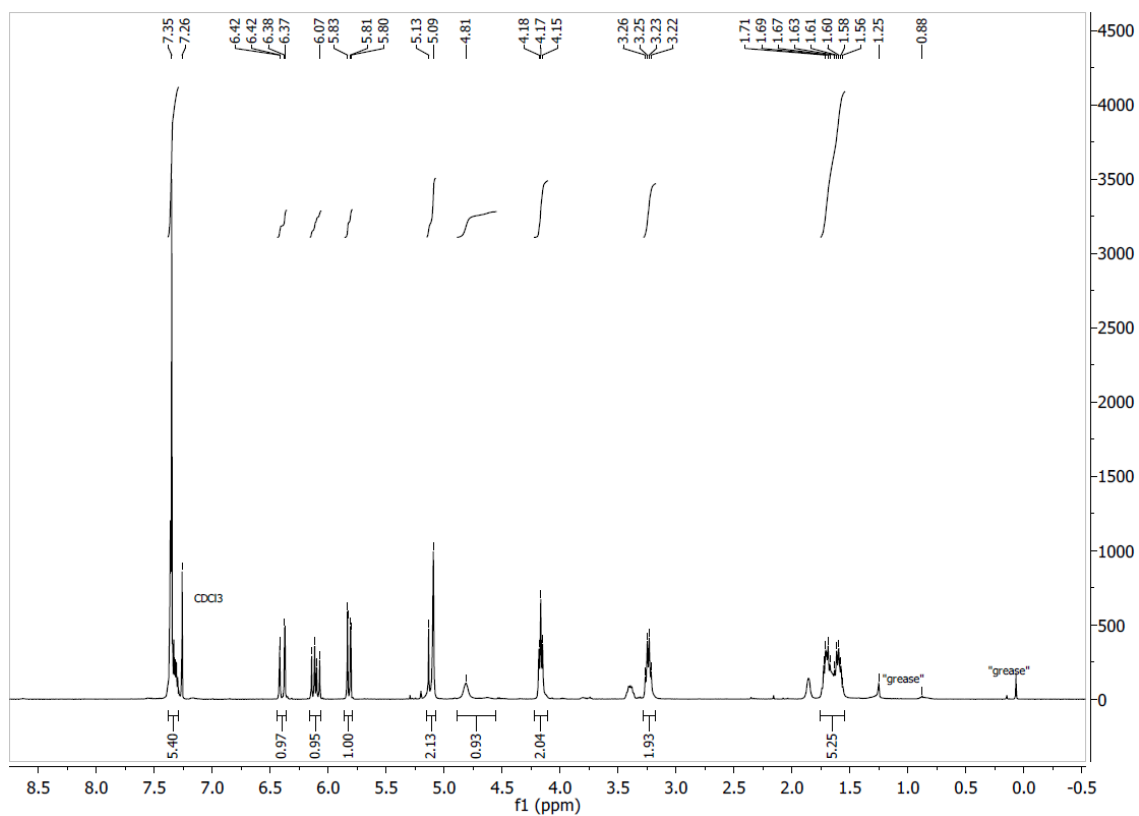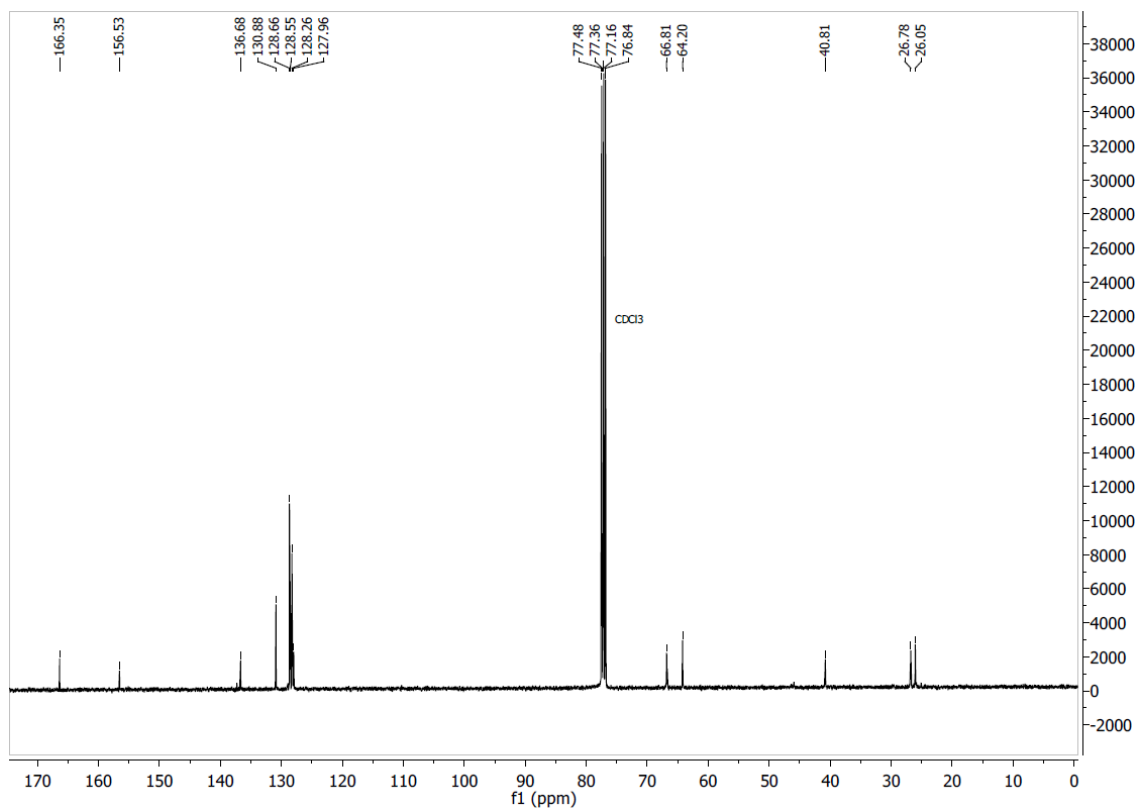



### 36. Cyclohexyl acetate (46).

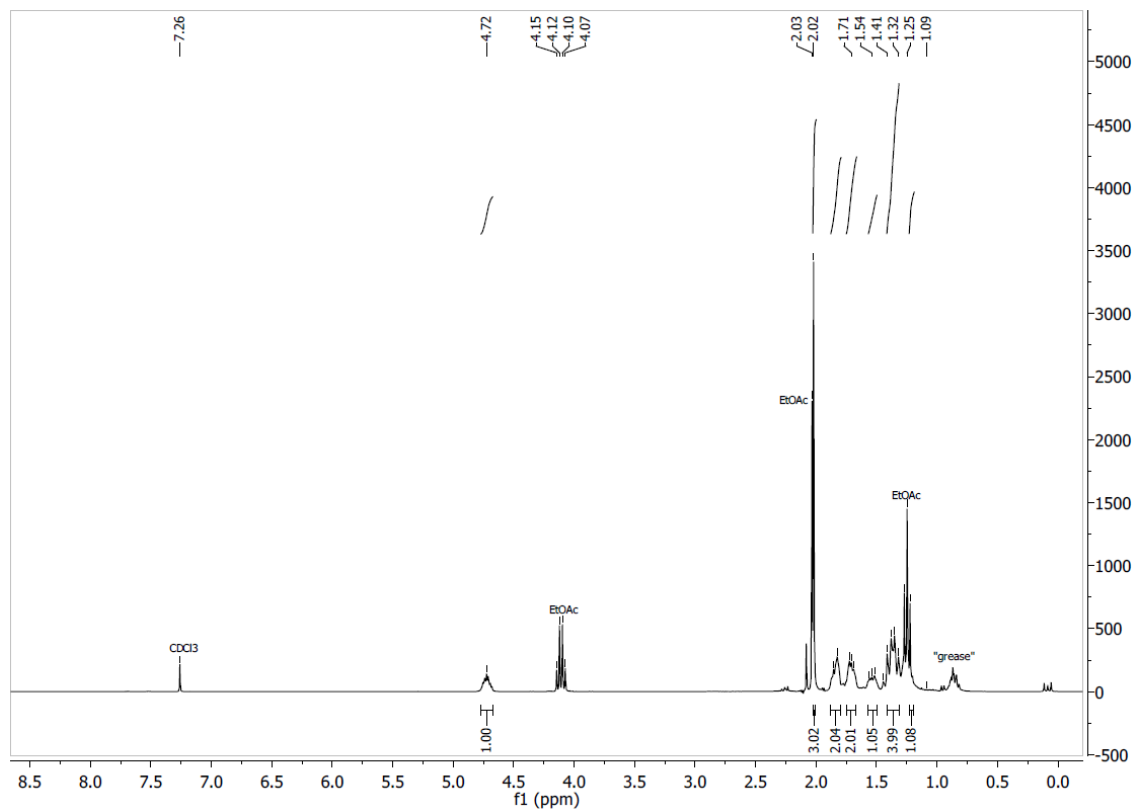

### 37. Cyclohexyl phenylacetate (47).

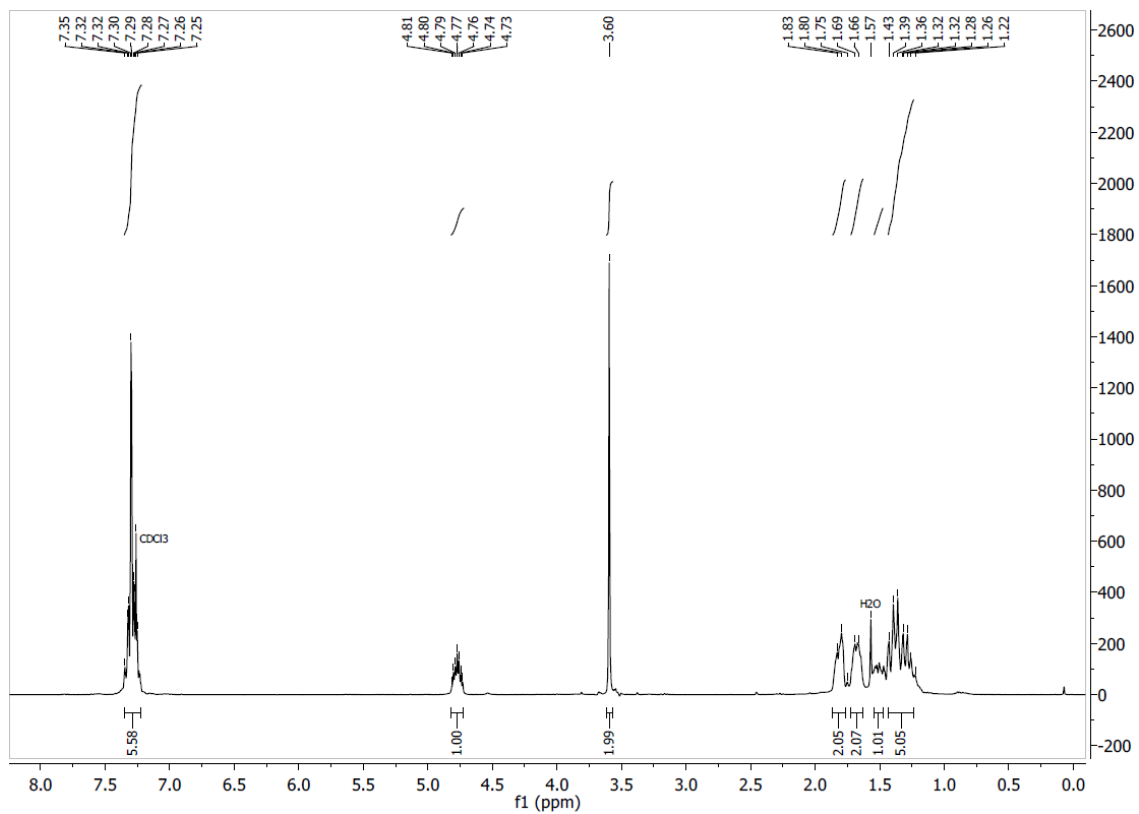

38. 2-(4-Hydroxyphenyl)ethyl acetate (54).

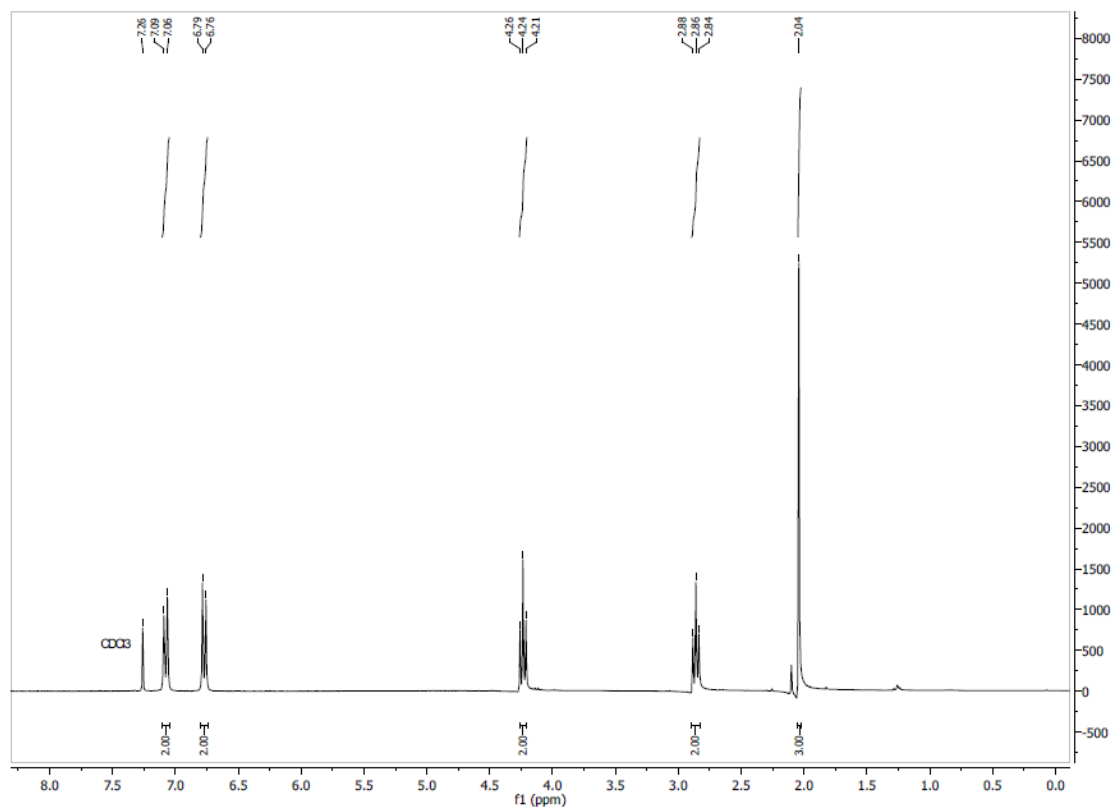

39. 2-(4-Hydroxyphenyl)ethyl phenylacetate, monaspilosin (55).

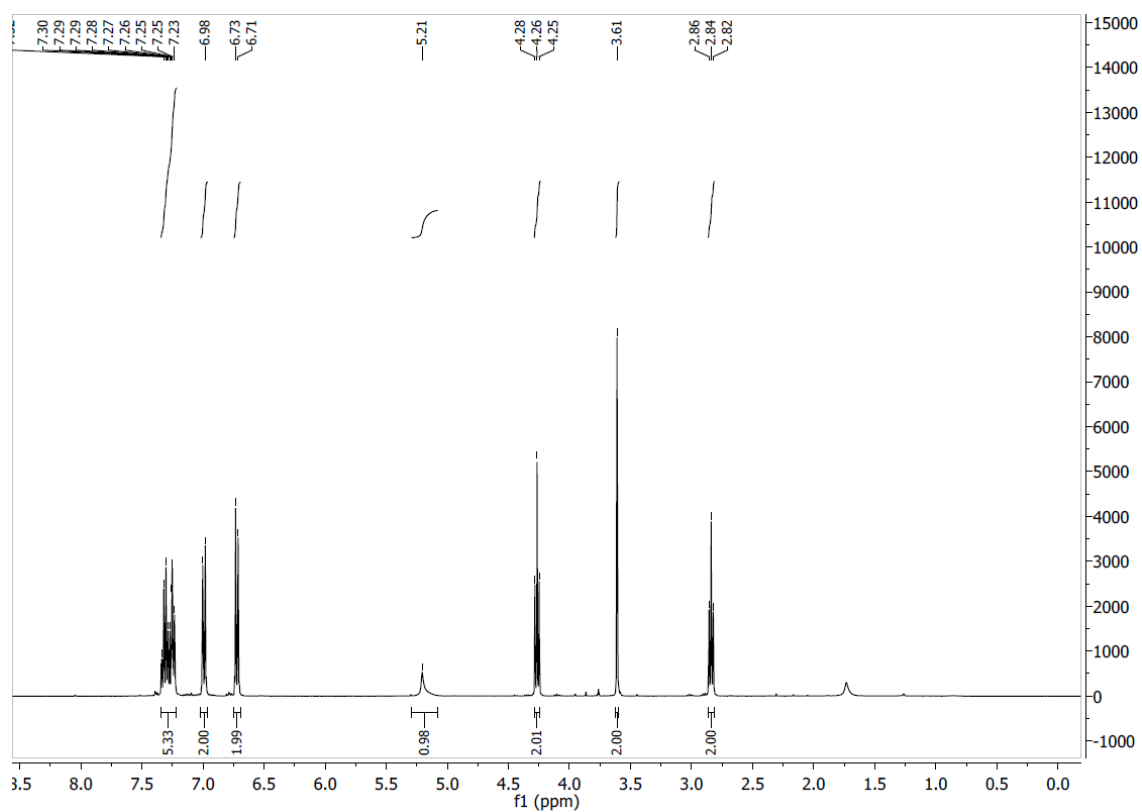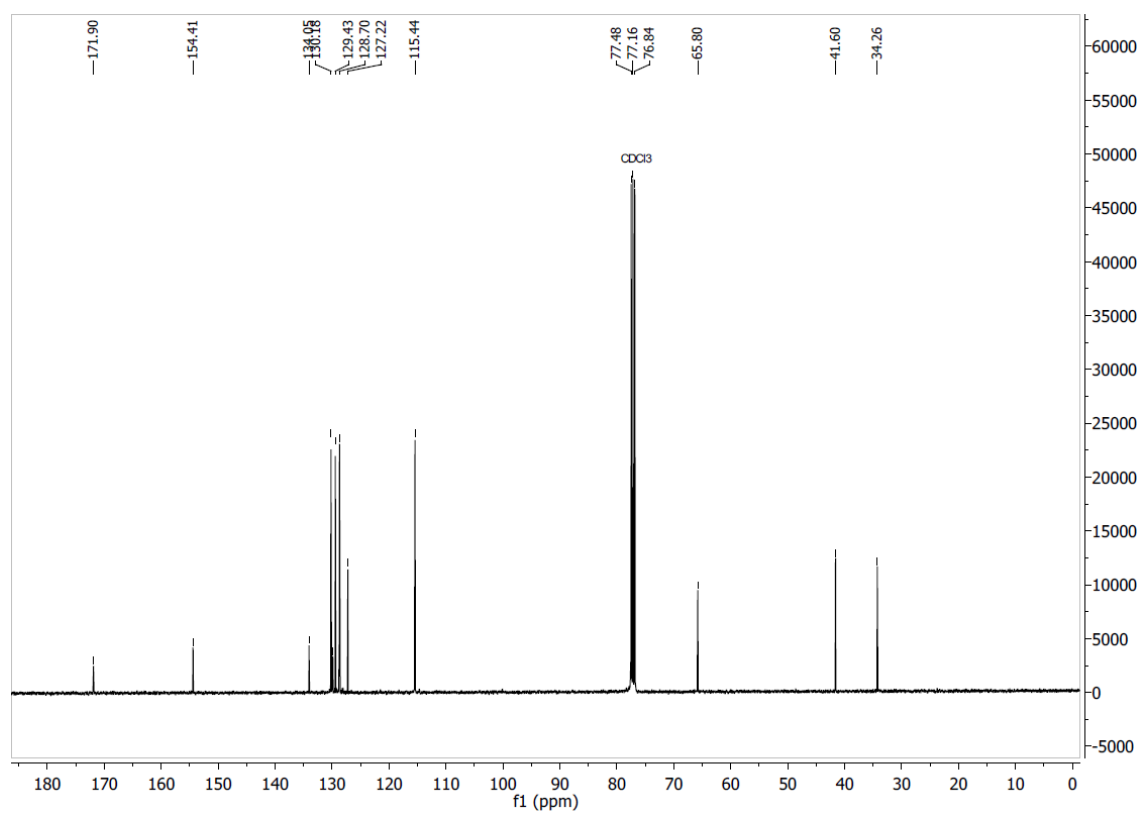

#### 40. Benzyl acetate (57).

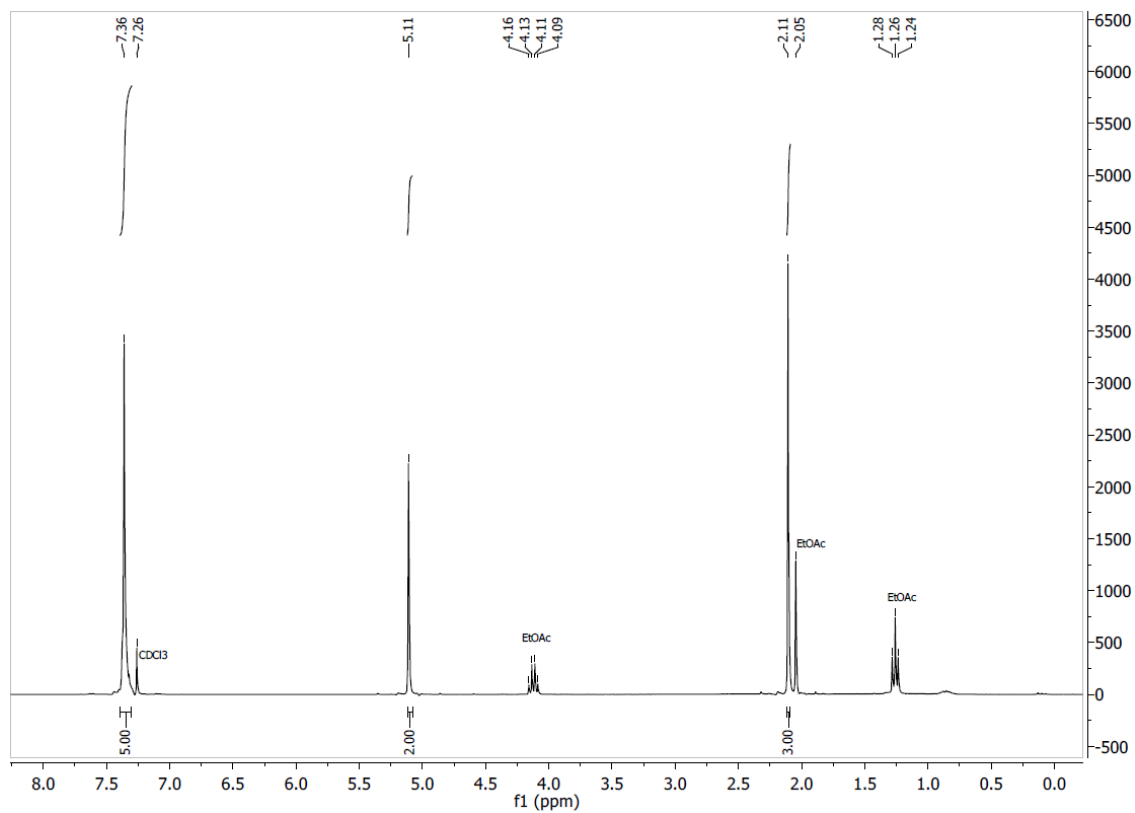

#### 41. N-Benzylacetamide (58)

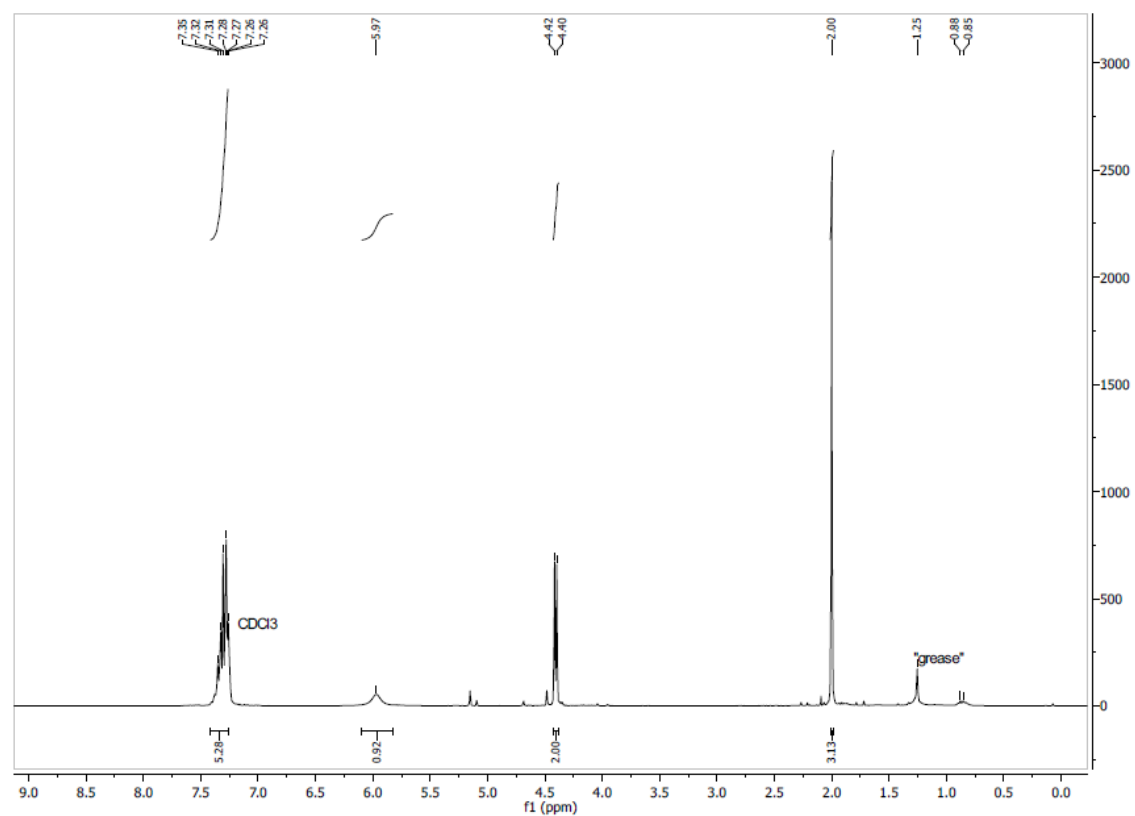

## 42. Benzyl phenylacetate (59).

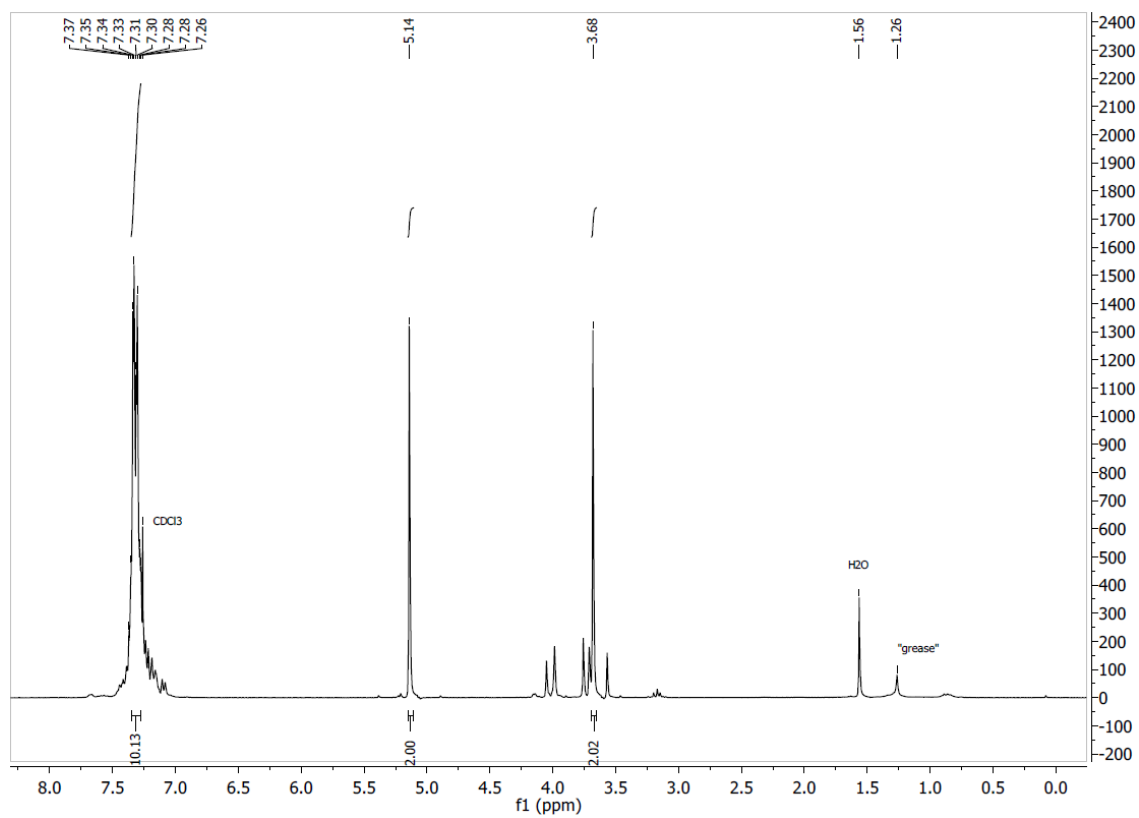

### 43. *N*-Benzyl-phenylacetamide (60).

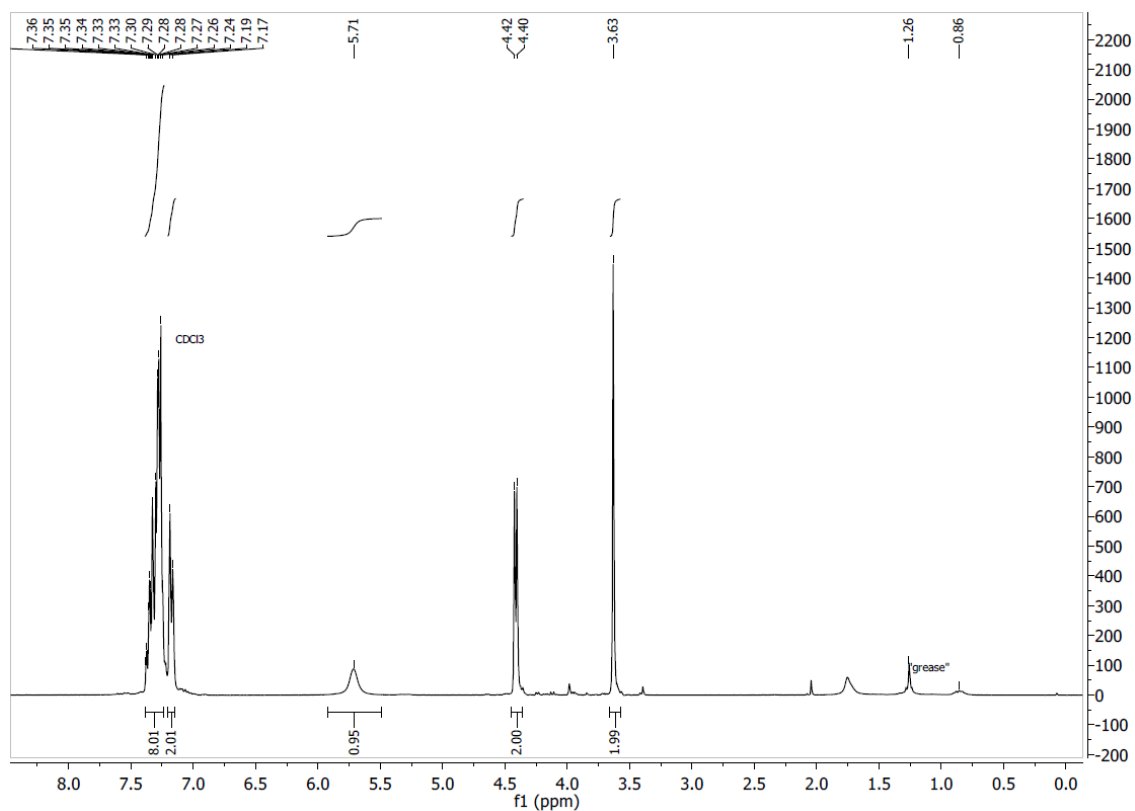

### 44. *N*-Benzylbenzamide (61).

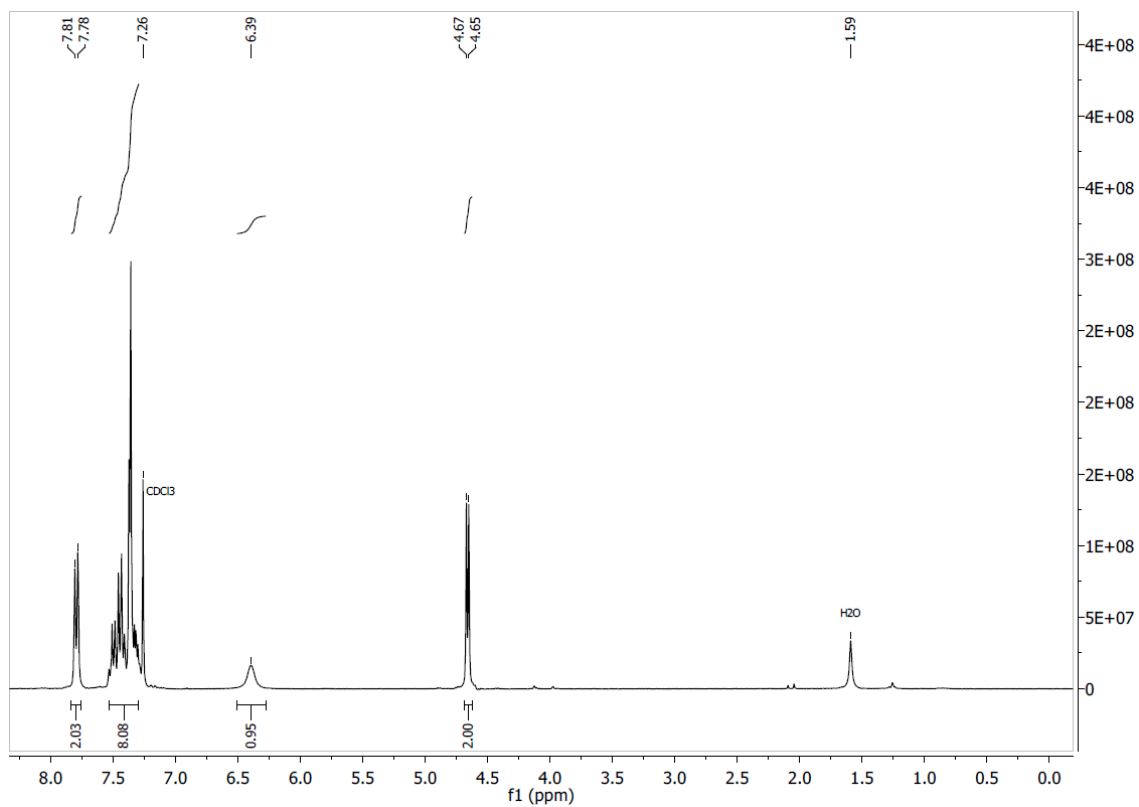

### 45. Benzyl acrylate (62).

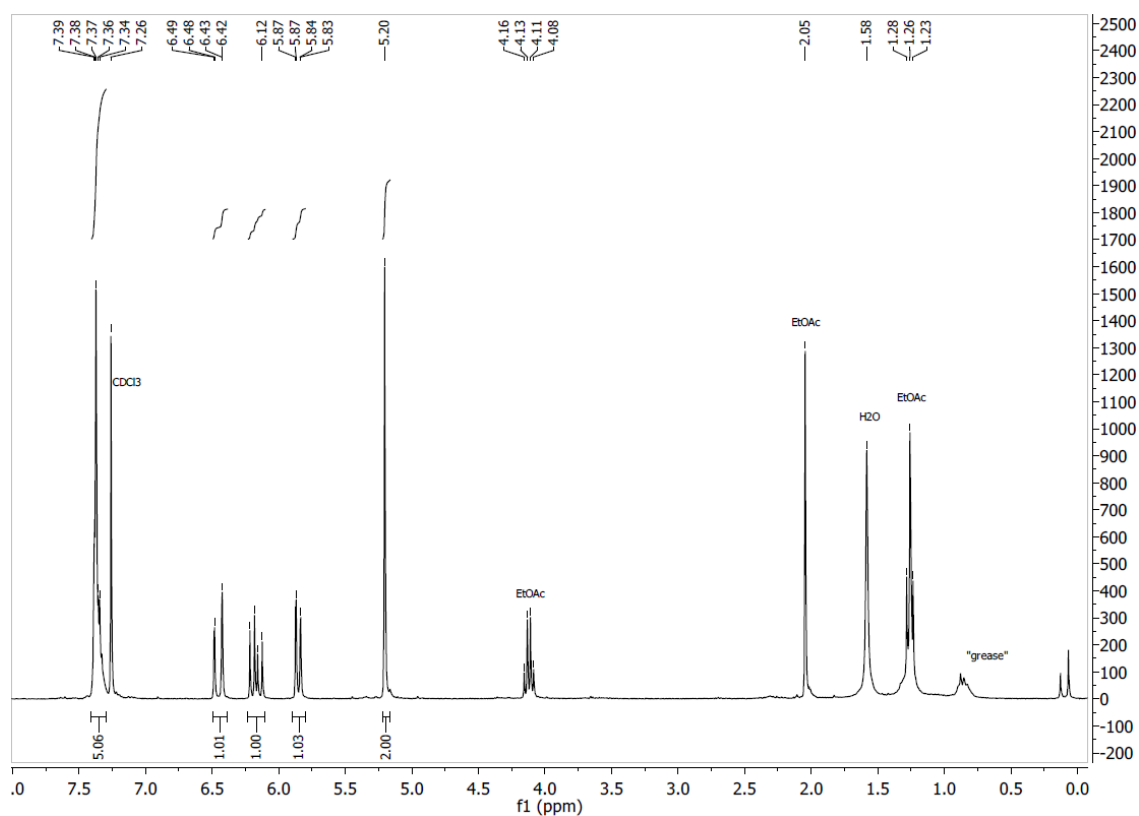

### 46. N-Benzylacrylamide (63)

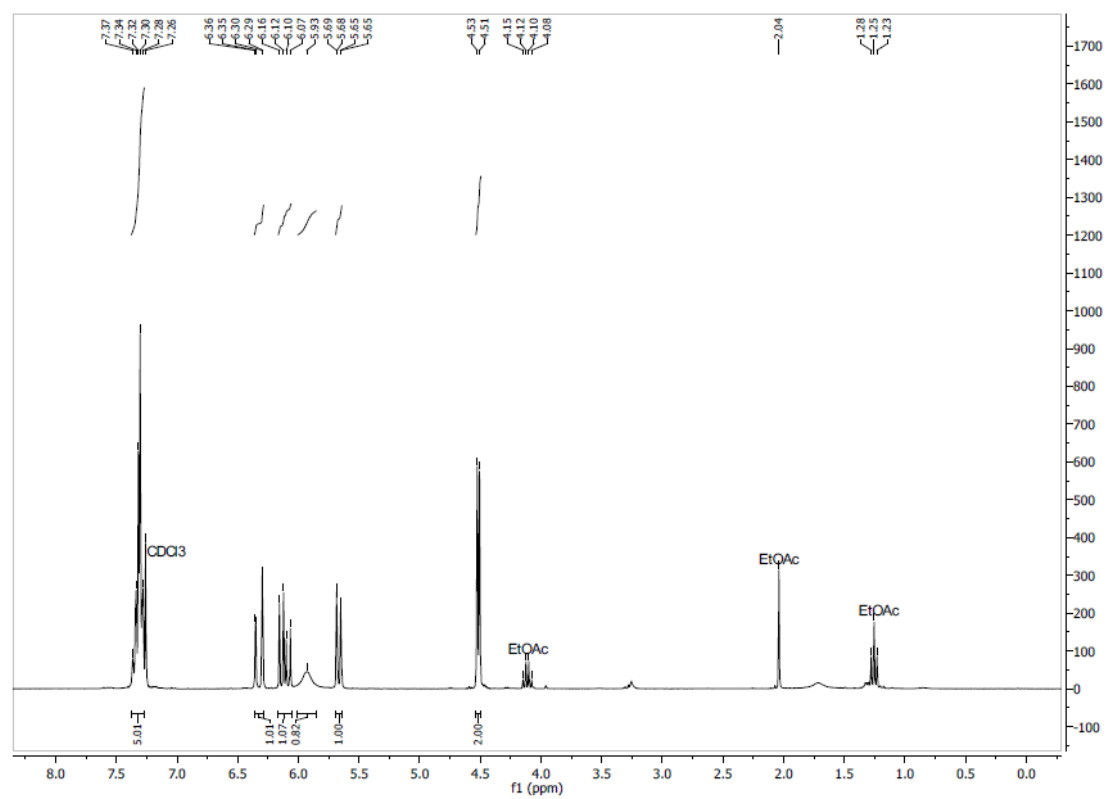

#### 47. 4-Fluorobenzyl acetate (65).

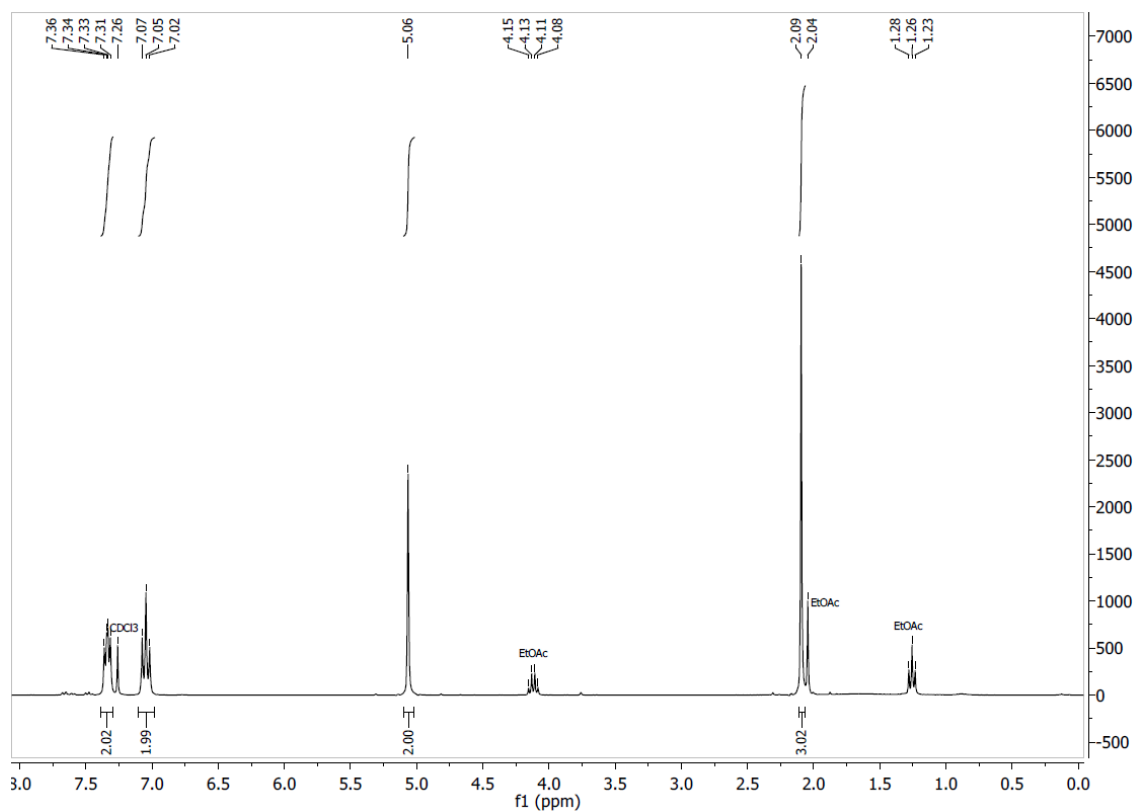

#### 48. N-4-(Fluorobenzyl)acetamide (66).

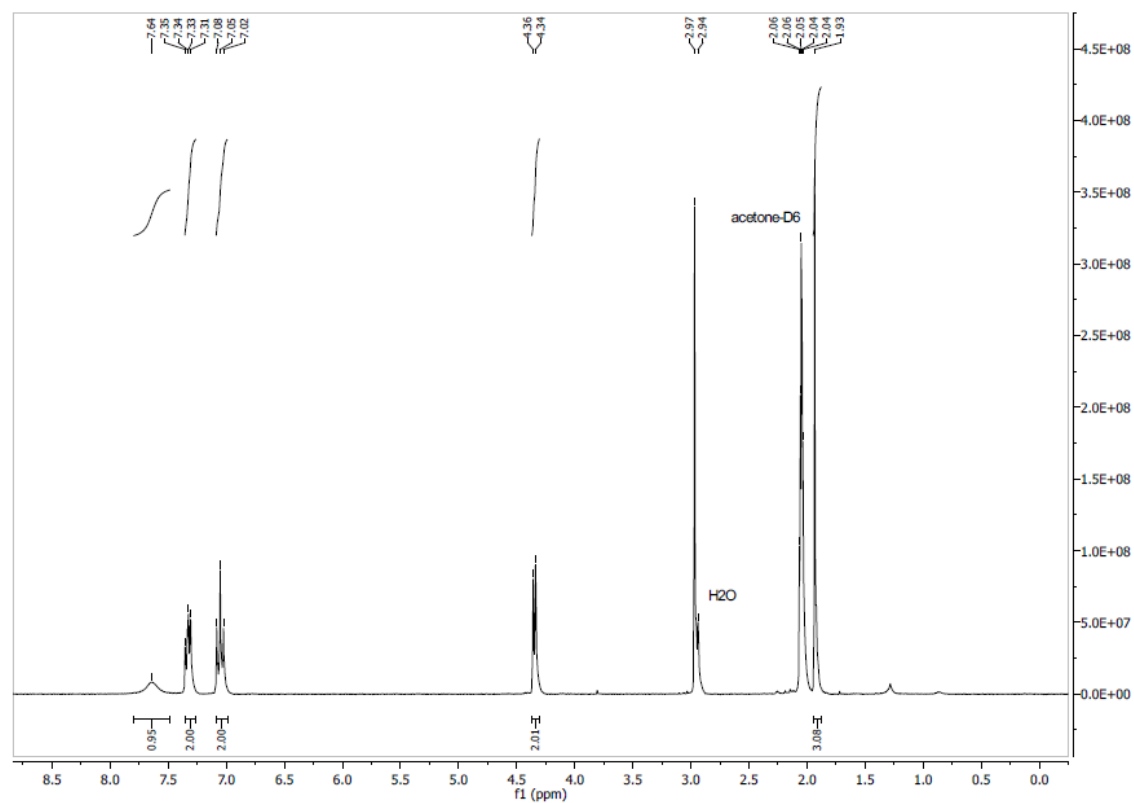



49. *N*-(4-Fluorobenzyl)phenylacetamide (67).

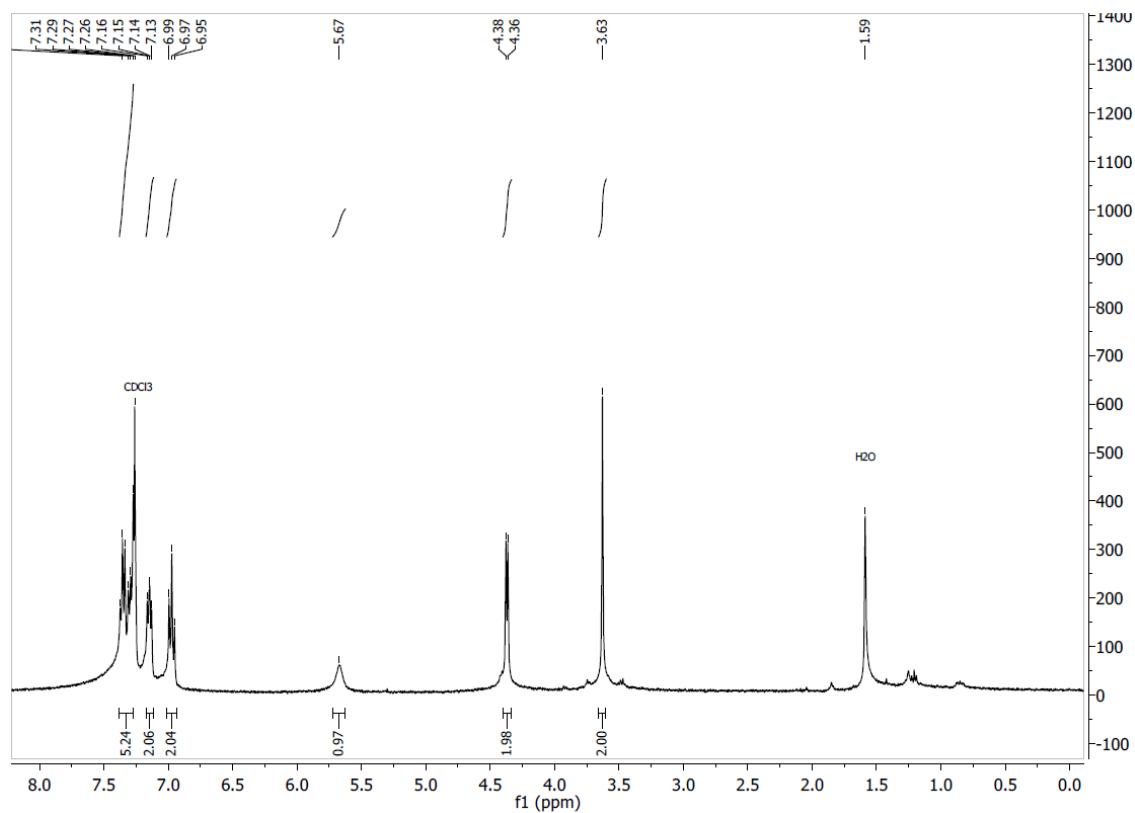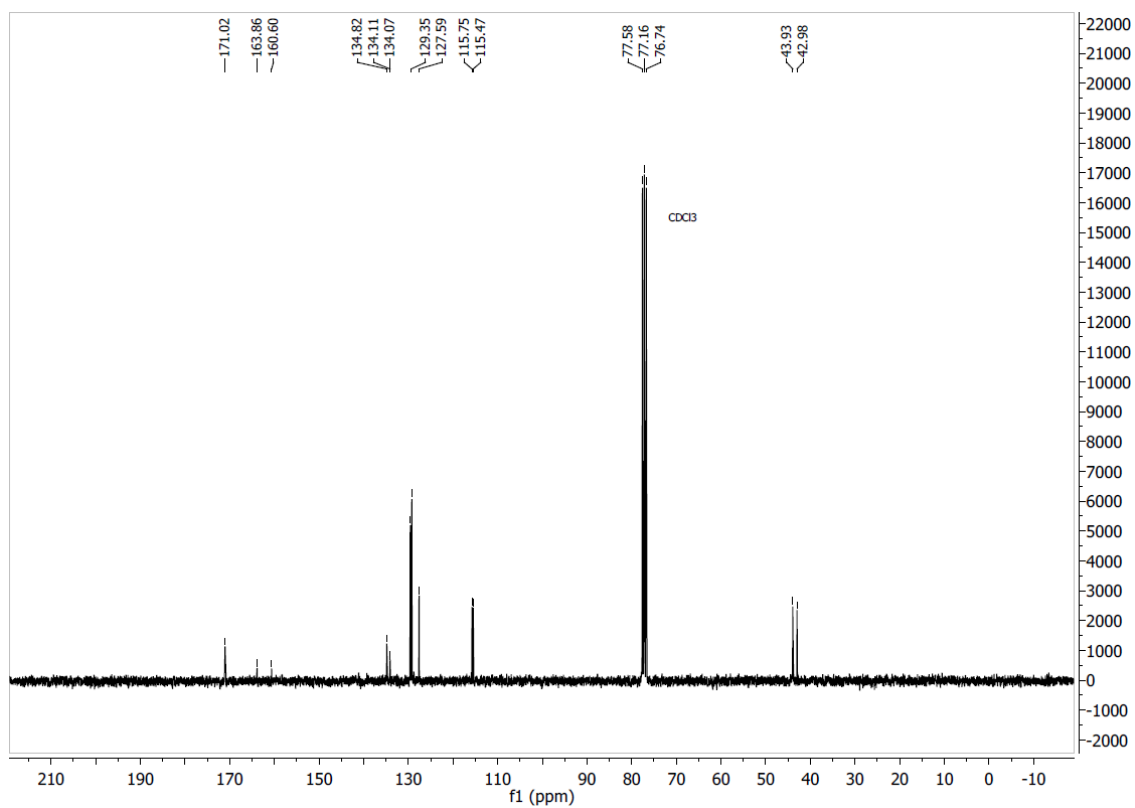

50. *N*-(4-Fluorobenzyl)benzamide (68).

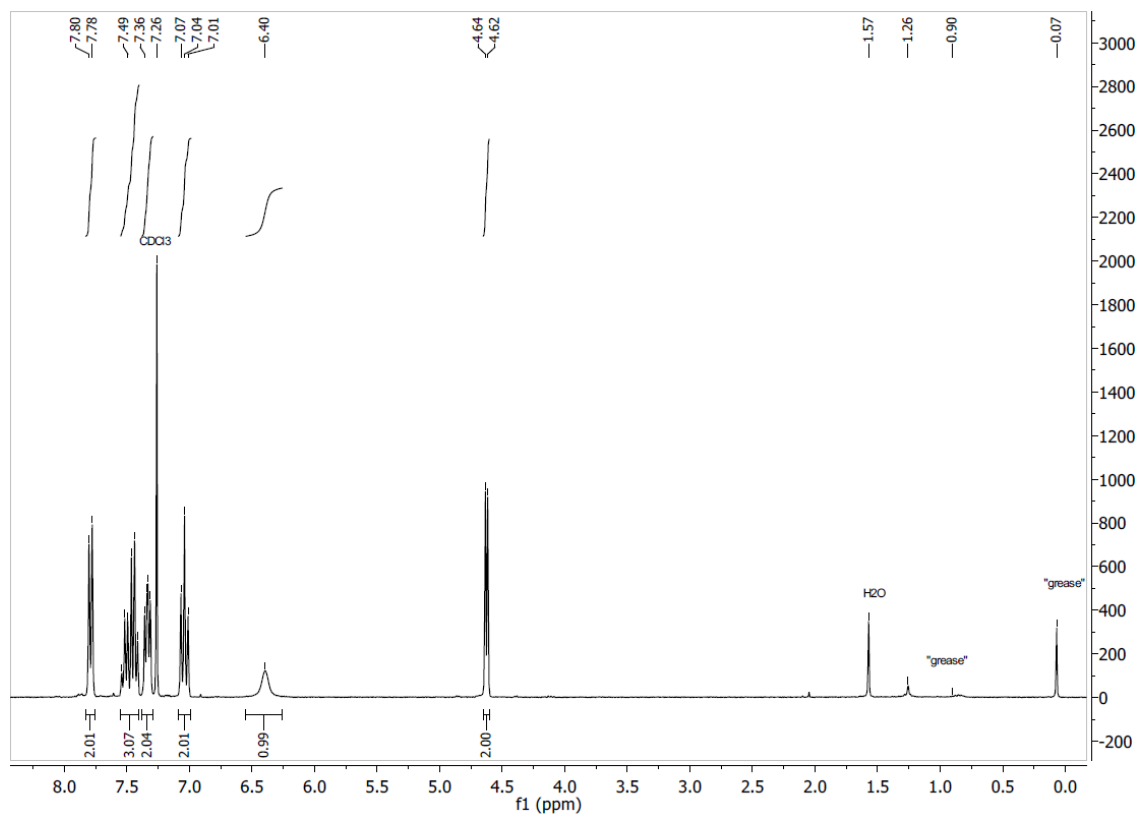

### 51. *N*-(4-Fluorobenzyl)acrylamide (69).

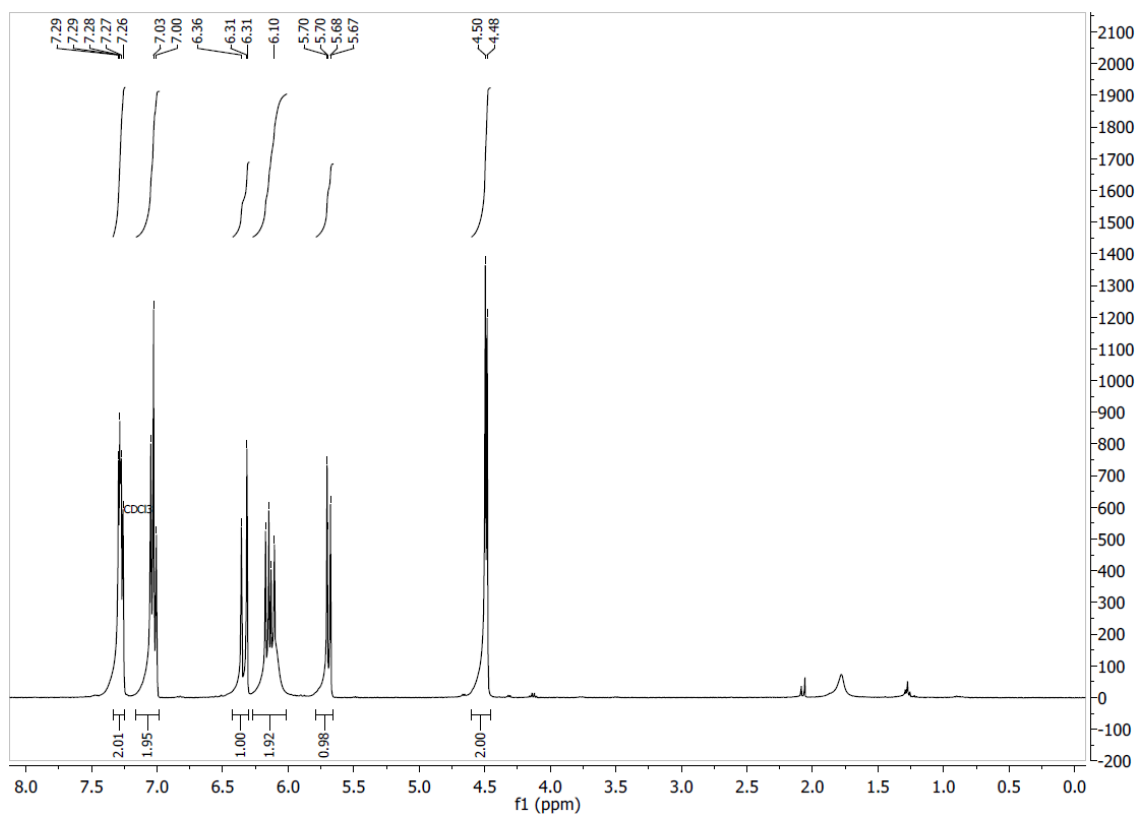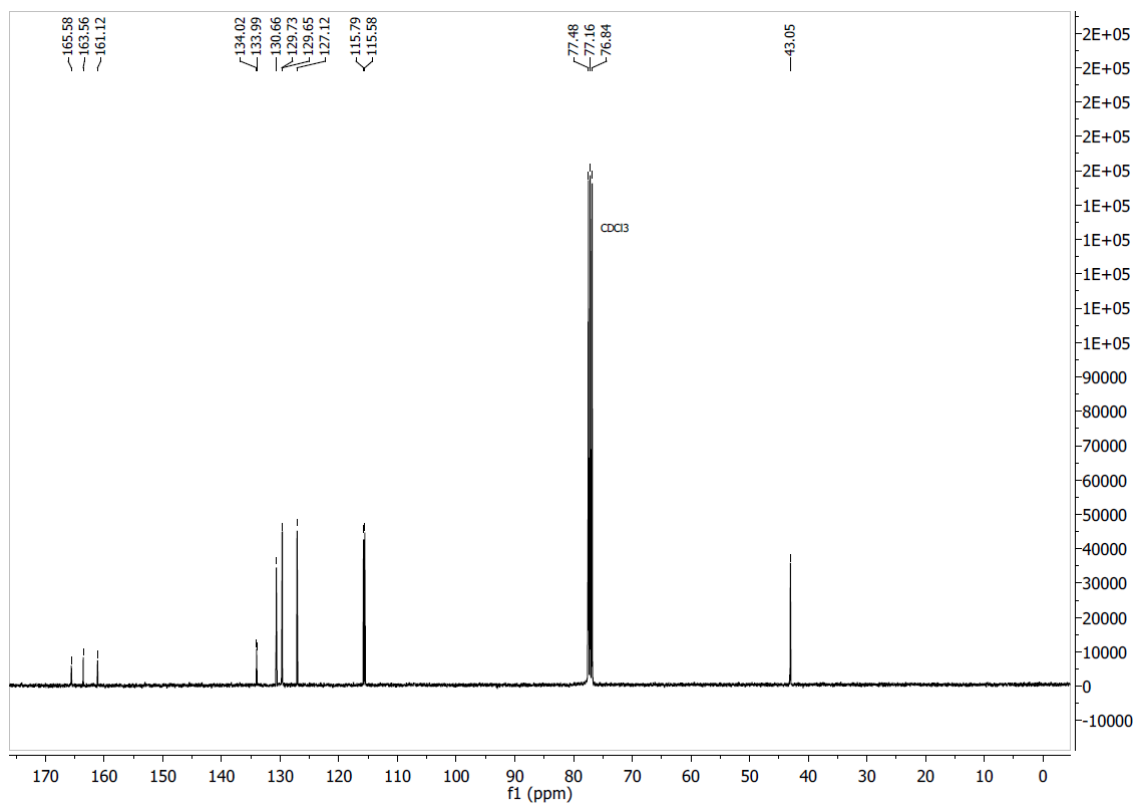

Supplement: Beilstein_J_Org_Chem-09-1572-s001.pdf [file Beilstein_J_Org_Chem-09-1572-s001.pdf]
